# Supplementary material
Source: publisher figshare collection journal article supplement (https://diabetesjournals.figshare.com/ndownloader/files/27508082)
Supplement: Supplementary file 1 [file 27508082]

## Sheet: Sheet1
footprint	observed_tc_flanking_upstream_500	expected_tc_flanking_upstream_500	fold_tc_flanking_upstream_500	pvalue_tc_flanking_upstream_500	observed_tc_flanking_downstream_500	expected_tc_flanking_downstream_500	fold_tc_flanking_downstream_500	pvalue_tc_flanking_downstream_500	significance
AFP_1	1314	2589.66	0.5076	0.0001	956	2431.25	0.3935	0.0001	None significant
AHR_1	50104	28597.1	1.752	0.0001	43251	25989.2	1.6642	0.0001	Both significant
AHR_2	21007	8954.72	2.3458	0.0001	14505	8113.67	1.7876	0.0001	Both significant
AHR__ARNT_1	17594	9698.92	1.8139	0.0001	13542	8786.42	1.5412	0.0001	Both significant
AHR__ARNT_2	50766	25567.5	1.9855	0.0001	42012	23098.3	1.8188	0.0001	Both significant
AIRE_1	4660	7806.43	0.597	0.0001	3672	7279.06	0.5045	0.0001	None significant
AIRE_2	3905	5529.71	0.7062	0.0001	2856	5164.29	0.5531	0.0001	None significant
ALX1_1	1591	2759.82	0.5766	0.0001	878	2586.03	0.3398	0.0001	None significant
ALX1_2	1647	2378.19	0.6927	0.0001	740	2221.01	0.3335	0.0001	None significant
ALX1_3	1084	1975.27	0.549	0.0001	622	1848.83	0.3368	0.0001	None significant
ALX1_4	929	1607.54	0.5782	0.0001	659	1499.35	0.4399	0.0001	None significant
ALX1_5	627	1470.05	0.4269	0.0001	324	1380.24	0.2353	0.0001	None significant
ALX1_6	861	2002.12	0.4303	0.0001	515	1874.33	0.2752	0.0001	None significant
ALX3_1	1509	2266.48	0.6659	0.0001	567	2160.99	0.2627	0.0001	None significant
ALX3_2	1090	1640.1	0.6648	0.0001	578	1521.18	0.3804	0.0001	None significant
ALX3_3	1222	1758.5	0.6951	0.0001	657	1638.06	0.4015	0.0001	None significant
ALX3_4	640	1481.42	0.4324	0.0001	376	1388.89	0.2712	0.0001	None significant
ALX4_1	3543	5504.44	0.6437	0.0001	3167	5110.4	0.6198	0.0001	None significant
ALX4_2	1732	2285.11	0.7581	0.003	999	2133.95	0.4684	0.0001	None significant
ALX4_3	767	1634.16	0.4697	0.0001	437	1524.8	0.2871	0.0001	None significant
ALX4_4	767	1557.87	0.4927	0.0001	385	1455.66	0.265	0.0001	None significant
AP1_known1	8716	11854.4	0.7353	0.0001	6374	10911.6	0.5842	0.0001	None significant
AP1_known10	2706	8152.08	0.332	0.0001	1671	7566.32	0.221	0.0001	None significant
AP1_known2	7005	11480.2	0.6102	0.0001	5308	10605.4	0.5005	0.0001	None significant
AP1_known3	8690	16487.4	0.5271	0.0001	6199	15243.6	0.4067	0.0001	None significant
AP1_known4	7421	13185.3	0.5629	0.0001	5578	12192.5	0.4575	0.0001	None significant
AP1_known5	3562	10488.2	0.3397	0.0001	2174	9755.95	0.2229	0.0001	None significant
AP1_known6	10980	20535.1	0.5347	0.0001	8507	18960.2	0.4487	0.0001	None significant
AP1_known7	9591	14795.1	0.6483	0.0001	6900	13639	0.5059	0.0001	None significant
AP1_known8	5515	12796	0.431	0.0001	3605	11864	0.3039	0.0001	None significant
AP1_known9	4485	10765	0.4167	0.0001	3313	9987.36	0.3318	0.0001	None significant
AP3_1	863	1064.08	0.8112	0.0075	575	993.737	0.579	0.0001	None significant
ARHGEF12_1	1590	980.108	1.6216	0.0001	1017	910.709	1.1166	0.2055	Only upstream significant
ARID3A_2	1670	2783.62	0.6001	0.0001	895	2621.42	0.3417	0.0001	None significant
ARID5A_1	1134	2162.26	0.5247	0.0001	621	2024.92	0.307	0.0001	None significant
ARID5B_1	2871	3784.64	0.7587	0.0001	2760	3525.67	0.7829	0.0001	None significant
ARNTL_1	6636	3897.95	1.7023	0.0001	2930	3551.58	0.825	0.0001	Only upstream significant
ARNT_1	16440	9026.54	1.8212	0.0001	9445	8183	1.1542	0.0001	Both significant
ARNT_2	16508	9073.22	1.8193	0.0001	9751	8251.4	1.1817	0.0001	Both significant
ARX_1	1404	2112.77	0.6647	0.0001	614	1972.72	0.3116	0.0001	None significant
ARX_2	683	1430.78	0.4777	0.0001	320	1345.11	0.2385	0.0001	None significant
ARX_3	683	1444.24	0.4733	0.0001	320	1354.85	0.2368	0.0001	None significant
ASCL2_2	13485	19128.7	0.705	0.0001	14919	17618.9	0.8468	0.0001	None significant
ATF2_1	2384	704.608	3.3801	0.0001	340	632.855	0.538	0.0001	Only upstream significant
ATF2_2	10015	4448.02	2.2513	0.0001	4554	4042.89	1.1264	0.0059	Only upstream significant
ATF2_3	4135	1585.21	2.6075	0.0001	1297	1439.85	0.9009	0.0826	Only upstream significant
ATF3_known1	15094	6226.67	2.4239	0.0001	7663	5647.8	1.3567	0.0001	Both significant
ATF3_known10	7702	5036.72	1.5291	0.0001	4561	4608.12	0.9898	0.4023	Only upstream significant
ATF3_known12	18215	8415.98	2.1642	0.0001	8636	7612.75	1.1344	0.0014	Both significant
ATF3_known13	11808	4827.35	2.4458	0.0001	4960	4385.56	1.131	0.0059	Only upstream significant
ATF3_known14	7892	2748.15	2.8711	0.0001	2570	2477.4	1.0374	0.261	Only upstream significant
ATF3_known15	5247	2785.09	1.8836	0.0001	1862	2549.06	0.7306	0.0001	Only upstream significant
ATF3_known16	10125	5143.81	1.9682	0.0001	3109	4665.75	0.6664	0.0001	Only upstream significant
ATF3_known2	4229	1402.74	3.0134	0.0001	1034	1264.21	0.818	0.0045	Only upstream significant
ATF3_known3	13913	6108.21	2.2775	0.0001	6904	5534.62	1.2474	0.0001	Both significant
ATF3_known4	23953	11113.8	2.1551	0.0001	17683	10053.5	1.7588	0.0001	Both significant
ATF3_known5	16785	13363.5	1.256	0.0001	14922	12224.1	1.2207	0.0001	Both significant
ATF3_known6	12125	5204.2	2.3296	0.0001	5045	4719.45	1.069	0.0693	Only upstream significant
ATF3_known7	12118	5165.4	2.3457	0.0001	5363	4685.55	1.1446	0.0001	Both significant
ATF3_known8	7038	2724.92	2.5822	0.0001	1932	2484.44	0.7777	0.0013	Only upstream significant
ATF3_known9	16908	12457.9	1.3572	0.0001	11855	11343.4	1.0451	0.0995	Only upstream significant
ATF4_1	15090	10423.8	1.4476	0.0001	10626	9487.71	1.12	0.0014	Both significant
ATF4_2	4153	4385.72	0.9469	0.1666	1698	4089.41	0.4154	0.0001	None significant
ATF4_3	3190	4622.44	0.6902	0.0001	1609	4294.16	0.3748	0.0001	None significant
ATF6_1	4473	2022.81	2.2107	0.0001	2116	1829.78	1.1563	0.0134	Only upstream significant
ATF7_1	6563	3443.18	1.9058	0.0001	1808	3154.52	0.5733	0.0001	Only upstream significant
BACH1_1	7366	19115.5	0.3854	0.0001	5553	17783.3	0.3123	0.0001	None significant
BACH2_1	8244	13821.9	0.5965	0.0001	6288	12759.4	0.4929	0.0001	None significant
BARHL1_1	2284	3685.16	0.6199	0.0001	1036	3448.42	0.3006	0.0001	None significant
BARHL1_2	1525	1145.07	1.3315	0.0001	1189	1058.32	1.1234	0.0975	Only upstream significant
BARHL1_3	2069	2839.42	0.7288	0.0001	1302	2634.9	0.4943	0.0001	None significant
BARHL1_4	1493	2334.08	0.6398	0.0001	775	2181.2	0.3556	0.0001	None significant
BARHL2_1	1892	3653.17	0.518	0.0001	916	3422.8	0.2678	0.0001	None significant
BARHL2_2	1233	958.739	1.2858	0.0001	845	893.731	0.9455	0.3189	Only upstream significant
BARHL2_3	1564	2532.2	0.6178	0.0001	953	2365.78	0.4031	0.0001	None significant
BARHL2_4	1591	2427.48	0.6556	0.0001	772	2267.25	0.3408	0.0001	None significant
BARHL2_5	1221	1061.96	1.1496	0.0641	858	982.001	0.8739	0.0926	None significant
BARHL2_6	1693	2484.62	0.6815	0.0001	913	2313.68	0.3949	0.0001	None significant
BARHL2_7	1429	2337.82	0.6114	0.0001	743	2188.2	0.3398	0.0001	None significant
BARX1_1	1933	3126.72	0.6183	0.0001	1194	2943.39	0.4059	0.0001	None significant
BARX1_2	1568	2907.07	0.5395	0.0001	801	2721.06	0.2946	0.0001	None significant
BARX1_3	1343	1733.32	0.7749	0.0001	737	1610.32	0.458	0.0001	None significant
BARX2_1	1207	2467.14	0.4894	0.0001	684	2318.11	0.2954	0.0001	None significant
BATF_known1	5934	4108.88	1.4441	0.0001	2204	3764.98	0.5855	0.0001	Only upstream significant
BBX_1	1391	3349.32	0.4155	0.0001	790	3133.63	0.2523	0.0001	None significant
BCL6B_1	5118	5527.82	0.9259	0.0765	4145	5140.6	0.8064	0.0001	None significant
BHLHA15_1	503	1557.28	0.3234	0.0001	420	1452.38	0.2897	0.0001	None significant
BHLHE22_1	582	1676.15	0.3476	0.0001	455	1578.58	0.2887	0.0001	None significant
BHLHE23_1	573	1445.52	0.3968	0.0001	540	1352.06	0.3998	0.0001	None significant
BHLHE40_known1	14202	8853.35	1.6041	0.0001	7752	8077.34	0.9597	0.1568	Only upstream significant
BHLHE40_known2	19314	12162.7	1.5879	0.0001	11049	11107.6	0.9947	0.4597	Only upstream significant
BHLHE40_known3	8977	4631.81	1.9379	0.0001	4710	4186.01	1.1251	0.0029	Both significant
BHLHE40_known4	8086	3944.63	2.0496	0.0001	3641	3577.82	1.0177	0.3882	Only upstream significant
BHLHE41_1	11091	5440.64	2.0384	0.0001	5833	4930.67	1.183	0.0001	Both significant
BHLHE41_2	6593	3773.04	1.7472	0.0001	3072	3435.28	0.8943	0.0287	Only upstream significant
BPTF_1	7471	8075.76	0.9251	0.0309	6612	7534.21	0.8776	0.0001	None significant
BRCA1_known1	3087	3151.36	0.9796	0.3592	2388	2921.63	0.8174	0.0001	None significant
BRCA1_known2	5982	5084.45	1.1765	0.0001	5834	4643.59	1.2563	0.0001	Both significant
BSX_1	3317	3704.36	0.8955	0.0555	1741	3454.59	0.5041	0.0001	None significant
BSX_2	1611	1943.65	0.8289	0.003	899	1807.36	0.4977	0.0001	None significant
CACD_1	86344	58788.4	1.4687	0.0001	75360	53276.5	1.4145	0.0001	Both significant
CBX5_1	2116	4299.53	0.4923	0.0001	1716	4046.93	0.4242	0.0001	None significant
CCDC6_1	3979	4239.78	0.9385	0.1365	3266	3930.78	0.8309	0.003	None significant
CDC5L_1	902	1753.09	0.5148	0.0001	679	1643.8	0.4134	0.0001	None significant
CDX1_1	1887	3580.45	0.5272	0.0001	1211	3352.82	0.3614	0.0001	None significant
CDX1_2	1297	2322.78	0.5586	0.0001	885	2176.99	0.4068	0.0001	None significant
CDX2_1	1281	2962.98	0.4325	0.0001	808	2773.51	0.2916	0.0001	None significant
CDX2_2	2203	3902.78	0.5646	0.0001	1343	3642.79	0.3688	0.0001	None significant
CDX2_3	1302	2325.2	0.5601	0.0001	882	2168.57	0.407	0.0001	None significant
CDX_1	1817	4140.33	0.439	0.0001	1476	3888.04	0.3798	0.0001	None significant
CEBPA_1	3603	4563.49	0.7896	0.0001	2011	4244.62	0.4739	0.0001	None significant
CEBPA_2	1742	1634.07	1.066	0.1693	853	1519.83	0.5615	0.0001	None significant
CEBPB_known1	5998	7590.74	0.7902	0.0001	4500	7060.12	0.6374	0.0001	None significant
CEBPB_known10	1330	1198.51	1.1096	0.1064	770	1109.45	0.6943	0.0001	None significant
CEBPB_known2	4036	4287.23	0.9414	0.1471	2522	3983.98	0.6331	0.0001	None significant
CEBPB_known3	5290	7932.29	0.6669	0.0001	4550	7363.95	0.6179	0.0001	None significant
CEBPB_known4	2681	2903.61	0.9234	0.1154	1522	2717.48	0.5602	0.0001	None significant
CEBPB_known5	6834	7613.97	0.8976	0.0135	5181	7052.91	0.7346	0.0001	None significant
CEBPB_known6	4971	6881.72	0.7224	0.0001	3833	6376.52	0.6012	0.0001	None significant
CEBPB_known7	3456	5307.61	0.6512	0.0001	2535	4936.81	0.5136	0.0001	None significant
CEBPB_known8	1421	1202.44	1.1816	0.0284	751	1125.16	0.6678	0.0001	None significant
CEBPB_known9	1340	1220.16	1.0981	0.1185	750	1128.59	0.6648	0.0001	None significant
CEBPD_1	3774	4191.37	0.9004	0.0225	2412	3893.51	0.6196	0.0001	None significant
CEBPD_2	1320	1171.88	1.1263	0.0945	750	1089	0.689	0.0001	None significant
CEBPE_1	1491	1263.27	1.1801	0.0164	831	1166.93	0.7124	0.0001	None significant
CEBPG_1	2859	4818.82	0.5934	0.0001	1750	4517.34	0.3875	0.0001	None significant
CEBPG_2	1550	1210.78	1.2799	0.0001	721	1115.33	0.6468	0.0001	Only upstream significant
CEBPG_3	1430	1277.59	1.1192	0.0908	691	1189.76	0.5811	0.0001	None significant
CENPB_1	18519	8138.91	2.2752	0.0001	15578	7379.98	2.1107	0.0001	Both significant
CLOCK_1	3587	3506.95	1.0228	0.3289	2527	3195.7	0.7908	0.0001	None significant
CLOCK__ARNTL_1	6013	3467.8	1.7337	0.0001	2723	3157.01	0.8626	0.0015	Only upstream significant
COMP1_1	14374	14220.5	1.0108	0.3822	11997	13105.4	0.9154	0.0255	None significant
CPEB1_1	2138	3206.84	0.6668	0.0001	1208	3012.91	0.4011	0.0001	None significant
CPHX_1	1924	4114.13	0.4678	0.0001	1382	3855.11	0.3587	0.0001	None significant
CREB3L1_1	14207	9793.71	1.4506	0.0001	10809	8954.62	1.2071	0.0001	Both significant
CREB3L1_2	8677	5494	1.5793	0.0001	5424	5013.7	1.0818	0.0524	Only upstream significant
CREB3L1_3	9262	6851.64	1.3517	0.0001	6766	6257.9	1.0812	0.0257	Only upstream significant
CREB3L1_4	17910	11930.9	1.5011	0.0001	14129	10879.4	1.2987	0.0001	Both significant
CREB3L2_1	13185	9767.03	1.3499	0.0001	9914	8923.75	1.111	0.0029	Both significant
CREB3L2_2	12515	7447.63	1.6803	0.0001	8544	6801.93	1.2561	0.0001	Both significant
CREB3_1	10480	5864.48	1.7869	0.0001	3952	5351.3	0.7386	0.0001	Only upstream significant
CREB3_2	12775	6686.97	1.9103	0.0001	6929	6066.9	1.1421	0.0001	Both significant
CREB5_1	5692	3334.57	1.7068	0.0001	1349	3066.37	0.4401	0.0001	Only upstream significant
CRX_1	4612	5153.51	0.8949	0.012	3736	4763.51	0.7843	0.0001	None significant
CRX_2	5244	4303.21	1.2186	0.0001	4461	4002.01	1.1147	0.0314	Only upstream significant
CTCF_known2	50991	34651.5	1.4715	0.0001	37218	31533.8	1.1803	0.0001	Both significant
CUX1_1	1322	1336.14	0.9894	0.4647	409	1247.11	0.3285	0.0001	None significant
CUX1_10	427	528.199	0.8088	0.0735	220	489.469	0.4506	0.0001	None significant
CUX1_2	551	756.346	0.7289	0.0181	348	707.965	0.4923	0.0001	None significant
CUX1_3	1282	835.47	1.5338	0.0001	1188	757.724	1.5671	0.0001	Both significant
CUX1_4	2383	3658.33	0.6515	0.0001	2208	3395.87	0.6503	0.0001	None significant
CUX1_5	1546	1558.47	0.992	0.4562	1690	1432.6	1.1795	0.0134	None significant
CUX1_6	3035	3931.37	0.7721	0.0001	2591	3622.61	0.7153	0.0001	None significant
CUX1_7	912	2526.42	0.3612	0.0001	799	2366.58	0.3379	0.0001	None significant
CUX1_8	413	927.991	0.4456	0.0001	352	852.838	0.4134	0.0001	None significant
CUX1_9	548	1003.55	0.5465	0.0001	530	930.975	0.5698	0.0001	None significant
CUX2_1	512	834.868	0.6137	0.0001	268	783.743	0.3428	0.0001	None significant
CUX2_2	407	406.634	1.0009	0.4813	180	375.469	0.4808	0.0001	None significant
DBP_1	1767	2993.68	0.5904	0.0001	1570	2793.64	0.5621	0.0001	None significant
DBP_2	2042	1383.63	1.4755	0.0001	686	1283.59	0.5348	0.0001	Only upstream significant
DBP_3	1111	1185.69	0.9371	0.2767	518	1108.74	0.4677	0.0001	None significant
DBP_4	1144	1175.75	0.973	0.3957	626	1103.98	0.5674	0.0001	None significant
DBX1_1	1474	3607	0.4088	0.0001	807	3398.2	0.2377	0.0001	None significant
DBX2_1	1053	2809.59	0.375	0.0001	510	2632.51	0.194	0.0001	None significant
DDIT3__CEBPA_1	5832	6174.82	0.9445	0.0929	5347	5698.64	0.9383	0.0897	None significant
DDIT3__CEBPA_2	4298	4613.08	0.9317	0.0615	3207	4259	0.7531	0.0001	None significant
DLX1_1	1311	2451.04	0.5351	0.0001	769	2296.81	0.3351	0.0001	None significant
DLX1_2	939	1471.94	0.6382	0.0001	566	1366.67	0.4146	0.0001	None significant
DLX1_3	1291	1480.46	0.8721	0.021	566	1386.76	0.4086	0.0001	None significant
DLX2_1	1739	3020.65	0.5758	0.0001	1234	2830.97	0.4361	0.0001	None significant
DLX2_2	1291	1482.1	0.8712	0.0225	566	1380.12	0.4105	0.0001	None significant
DLX2_3	801	1668.72	0.4803	0.0001	535	1558.33	0.3437	0.0001	None significant
DLX3_1	1373	2720.36	0.5049	0.0001	1003	2546.87	0.3941	0.0001	None significant
DLX3_2	1291	1486.13	0.8688	0.027	566	1382.29	0.4099	0.0001	None significant
DLX4_1	1534	2845.03	0.5393	0.0001	1193	2666.35	0.4476	0.0001	None significant
DLX4_2	1161	1417.29	0.8193	0.003	513	1315.31	0.3905	0.0001	None significant
DLX5_1	3082	3074.57	1.0024	0.4827	1977	2832.14	0.6982	0.0001	None significant
DLX5_2	708	1250.84	0.5664	0.0001	416	1167.14	0.357	0.0001	None significant
DLX6_1	885	1481.11	0.5978	0.0001	592	1384.97	0.4279	0.0001	None significant
DMBX1_1	2631	3354.37	0.7844	0.0015	2265	3100.98	0.7305	0.0001	None significant
DMBX1_2	1939	1881.64	1.0305	0.316	1455	1761.36	0.8262	0.0074	None significant
DMRT1_1	2045	4123.58	0.4961	0.0001	1538	3887.26	0.3958	0.0001	None significant
DMRT2_1	1543	3828.88	0.4031	0.0001	1160	3588.45	0.3234	0.0001	None significant
DMRT3_1	1165	2576.55	0.4524	0.0001	818	2426.75	0.3373	0.0001	None significant
DMRTA1_1	1225	2664.4	0.46	0.0001	825	2503.76	0.3298	0.0001	None significant
DMRTA2_1	2738	4845.73	0.5651	0.0001	1878	4531.79	0.4145	0.0001	None significant
DMRTC2_1	2983	5381.02	0.5544	0.0001	2244	5030.95	0.4461	0.0001	None significant
DOBOX4_1	2886	4066.32	0.7098	0.0001	2728	3767.46	0.7242	0.0001	None significant
DOBOX5_1	4056	4600.45	0.8817	0.0195	3087	4277.61	0.7217	0.0001	None significant
DPRX_1	2281	2234.93	1.0206	0.3941	1887	2067.56	0.9127	0.0954	None significant
DPRX_2	2160	2134.53	1.0119	0.4358	1942	1982.04	0.9798	0.3972	None significant
DRGX_1	703	1649.28	0.4266	0.0001	506	1561.65	0.3244	0.0001	None significant
DUX4_1	8605	5503.48	1.5635	0.0001	3147	5080.92	0.6195	0.0001	Only upstream significant
DUXA_1	1928	3069.89	0.6282	0.0001	939	2882.78	0.326	0.0001	None significant
E2F2_1	71250	29187.2	2.4411	0.0001	51410	26366.4	1.9498	0.0001	Both significant
E2F2_2	4462	4130.36	1.0803	0.1049	3213	3847.14	0.8352	0.0075	None significant
E2F2_3	4191	2894.19	1.4479	0.0001	3434	2677.43	1.2825	0.0001	Both significant
E2F2_4	2768	1980.13	1.3977	0.0001	1751	1833	0.9553	0.3147	Only upstream significant
E2F7_1	6822	4887.3	1.3958	0.0001	4971	4517.4	1.1004	0.0389	Only upstream significant
E2F8_1	10712	6864.49	1.5604	0.0001	8695	6296.09	1.381	0.0001	Both significant
E2F_known1	7151	3355.63	2.1307	0.0001	4934	3075.42	1.6041	0.0001	Both significant
E2F_known10	10373	4127.25	2.5129	0.0001	8681	3733.56	2.3248	0.0001	Both significant
E2F_known11	8991	3499.7	2.5686	0.0001	7181	3164.13	2.2691	0.0001	Both significant
E2F_known12	5283	1901.7	2.7771	0.0001	3985	1706.51	2.3344	0.0001	Both significant
E2F_known13	6908	2579.3	2.6776	0.0001	5262	2335.56	2.2525	0.0001	Both significant
E2F_known14	4866	1776.32	2.7384	0.0001	3769	1599.3	2.3558	0.0001	Both significant
E2F_known15	32197	13115	2.4549	0.0001	24211	11834.7	2.0457	0.0001	Both significant
E2F_known16	18855	7386.53	2.5524	0.0001	15740	6674.46	2.358	0.0001	Both significant
E2F_known17	28121	11443.7	2.4572	0.0001	24328	10342.1	2.3522	0.0001	Both significant
E2F_known18	37301	15518.9	2.4035	0.0001	31318	14050.3	2.2289	0.0001	Both significant
E2F_known2	6302	2473.57	2.5471	0.0001	5048	2241.68	2.2513	0.0001	Both significant
E2F_known20	17552	6867.23	2.5557	0.0001	14459	6205	2.33	0.0001	Both significant
E2F_known21	21785	8542.92	2.5499	0.0001	18363	7736.84	2.3733	0.0001	Both significant
E2F_known22	6302	2485.67	2.5347	0.0001	5048	2250.16	2.2428	0.0001	Both significant
E2F_known23	62892	25629.9	2.4538	0.0001	44342	23110.6	1.9187	0.0001	Both significant
E2F_known24	5370	3840.33	1.3982	0.0001	3772	3552.83	1.0617	0.1877	Only upstream significant
E2F_known25	3941	2284.06	1.7251	0.0001	2584	2109.03	1.2251	0.0059	Only upstream significant
E2F_known26	3356	2427.08	1.3826	0.0001	2462	2262.51	1.0881	0.1514	Only upstream significant
E2F_known27	12230	5767.76	2.1202	0.0001	11328	5235.31	2.1635	0.0001	Both significant
E2F_known28	8958	4285.26	2.0902	0.0001	8109	3870.73	2.0947	0.0001	Both significant
E2F_known29	5970	4336.86	1.3765	0.0001	5129	3988.09	1.286	0.0001	Both significant
E2F_known3	8176	2995.4	2.7289	0.0001	6441	2716.2	2.3708	0.0001	Both significant
E2F_known30	3255	2460.86	1.3226	0.0001	2507	2262.34	1.1081	0.0644	Only upstream significant
E2F_known4	8022	3596.06	2.2304	0.0001	7136	3256.77	2.1908	0.0001	Both significant
E2F_known5	10567	4212.96	2.5079	0.0001	9105	3824.74	2.3802	0.0001	Both significant
E2F_known6	17742	7401.15	2.397	0.0001	14809	6696.32	2.2113	0.0001	Both significant
E2F_known7	6859	2696.79	2.5428	0.0001	5609	2450.93	2.288	0.0001	Both significant
E2F_known8	11273	4412.04	2.5547	0.0001	9894	4001.71	2.4721	0.0001	Both significant
E2F_known9	21358	8044.94	2.6546	0.0001	16680	7270.05	2.2942	0.0001	Both significant
E4F1_1	6260	2883.4	2.1706	0.0001	2198	2634.26	0.8345	0.003	Only upstream significant
EBF1_known1	65192	51747.6	1.2598	0.0001	70527	47070.5	1.4983	0.0001	Both significant
EBF1_known2	19839	19859.9	0.9989	0.5147	21618	18167.8	1.1899	0.0001	Only downstream significant
EBF1_known3	24766	22681	1.0919	0.0001	26701	20668.4	1.2919	0.0001	Both significant
EBF1_known4	20309	18802.1	1.0801	0.0029	22844	17145.1	1.3324	0.0001	Both significant
EGR1_known1	57151	26590.4	2.1493	0.0001	40144	24035.2	1.6702	0.0001	Both significant
EGR1_known10	68020	30078.5	2.2614	0.0001	46931	27113.6	1.7309	0.0001	Both significant
EGR1_known11	131373	60368.5	2.1762	0.0001	94679	54337.2	1.7424	0.0001	Both significant
EGR1_known2	40730	20180.8	2.0182	0.0001	27892	18254.6	1.5279	0.0001	Both significant
EGR1_known5	71047	33999.5	2.0896	0.0001	53253	30644.2	1.7378	0.0001	Both significant
EGR1_known8	125201	57560.9	2.1751	0.0001	93385	51814.7	1.8023	0.0001	Both significant
EGR1_known9	85606	37300.5	2.295	0.0001	59676	33613.7	1.7753	0.0001	Both significant
EGR3_1	47939	23588.6	2.0322	0.0001	34873	21334.1	1.6346	0.0001	Both significant
EGR3_2	142070	65103.6	2.1822	0.0001	105987	58623.4	1.8079	0.0001	Both significant
EGR3_3	97883	43731.9	2.2382	0.0001	70307	39342.2	1.787	0.0001	Both significant
EGR4_1	65399	32160	2.0335	0.0001	48477	29038.2	1.6694	0.0001	Both significant
EHF_1	30260	14072.3	2.1502	0.0001	14523	12783	1.1361	0.0001	Both significant
EHF_2	19617	9266.98	2.1168	0.0001	8601	8436.51	1.0195	0.2934	Only upstream significant
ELF1_known1	11423	13124	0.8704	0.0001	10646	12138.6	0.877	0.0001	None significant
ELF1_known2	22067	9455.73	2.3336	0.0001	9740	8602.31	1.1322	0.0001	Both significant
ELF1_known3	14793	6784.83	2.1801	0.0001	7911	6180.64	1.2799	0.0001	Both significant
ELF2_1	70880	54242.2	1.3067	0.0001	62669	49380.1	1.2691	0.0001	Both significant
ELF3_1	11340	8870.77	1.2783	0.0001	4814	8193.75	0.5876	0.0001	Only upstream significant
ELF3_2	16188	8541.93	1.895	0.0001	6808	7825.87	0.87	0.003	Only upstream significant
ELF3_3	17774	9264.48	1.9184	0.0001	7781	8482.98	0.9173	0.012	Only upstream significant
ELF4_1	21831	9929.43	2.1985	0.0001	10522	9039.92	1.1639	0.0001	Both significant
ELF5_1	6011	6636.87	0.9057	0.0045	3954	6161.19	0.6418	0.0001	None significant
ELF5_2	20655	10922.9	1.8909	0.0001	9199	9939.14	0.9255	0.009	Only upstream significant
ELF5_3	21991	11435.8	1.9229	0.0001	10222	10410.7	0.9819	0.2866	Only upstream significant
ELF5_4	22253	11219.6	1.9833	0.0001	10334	10217.2	1.0114	0.3488	Only upstream significant
ELK3_1	19655	6513.5	3.0173	0.0001	6941	5876.12	1.1812	0.0001	Both significant
ELK3_2	18125	5918.73	3.062	0.0001	6161	5344.1	1.1528	0.0001	Both significant
ELK4_1	14611	4654.56	3.1386	0.0001	5619	4169.33	1.3476	0.0001	Both significant
ELK4_2	19148	6802.14	2.8147	0.0001	6697	6129.84	1.0925	0.0074	Only upstream significant
EMX1_1	1169	1690.23	0.6918	0.0001	719	1564.13	0.46	0.0001	None significant
EMX1_2	623	1858.1	0.3356	0.0001	417	1737.19	0.2405	0.0001	None significant
EMX2_1	2043	3085	0.6623	0.0001	1273	2869.61	0.4438	0.0001	None significant
EMX2_2	722	1321.49	0.5467	0.0001	449	1237.37	0.3634	0.0001	None significant
EMX2_3	782	2024.98	0.3865	0.0001	415	1892.16	0.2197	0.0001	None significant
EN1_1	1383	1242.2	1.1133	0.0568	1143	1147.72	0.9959	0.4787	None significant
EN1_2	7669	7639.7	1.0038	0.4668	7700	7017.88	1.0972	0.0014	Only downstream significant
EN1_3	1755	2722.31	0.6448	0.0001	952	2562.41	0.3718	0.0001	None significant
EN1_4	2363	2025.86	1.1663	0.0089	824	1877.94	0.4391	0.0001	None significant
EN1_5	1180	2158.96	0.5468	0.0001	412	2025.98	0.2038	0.0001	None significant
EN1_6	1057	1265.2	0.8356	0.015	386	1189.75	0.325	0.0001	None significant
EN1_7	1430	2468.11	0.5796	0.0001	651	2299.07	0.2835	0.0001	None significant
EN2_1	1610	2569.26	0.6268	0.0001	748	2414.79	0.31	0.0001	None significant
EN2_2	1309	1818.29	0.7201	0.0001	615	1681	0.3662	0.0001	None significant
EN2_3	4411	2743.77	1.6074	0.0001	1451	2513.8	0.5774	0.0001	Only upstream significant
EN2_4	935	1591.01	0.5879	0.0001	598	1484.58	0.4032	0.0001	None significant
EOMES_1	7449	9097.74	0.8188	0.0001	7046	8422.9	0.8365	0.0001	None significant
EOMES_2	4520	6186.15	0.7307	0.0001	4308	5727.16	0.7522	0.0001	None significant
EOMES_3	10291	8456.31	1.2169	0.0001	9230	7797.97	1.1836	0.0001	Both significant
EP300_known1	43350	29944	1.4477	0.0001	38311	27220.7	1.4074	0.0001	Both significant
ERF_1	15586	6366.72	2.4478	0.0001	5955	5794.63	1.0277	0.2534	Only upstream significant
ERG_1	17265	6540.49	2.6395	0.0001	6188	5916.83	1.0458	0.1298	Only upstream significant
ERG_2	10971	5775.66	1.8994	0.0001	8392	5262.4	1.5946	0.0001	Both significant
ERG_3	18045	6806.01	2.6511	0.0001	6438	6142.78	1.0481	0.1183	Only upstream significant
ERG_4	11397	5849.68	1.9482	0.0001	8661	5322.54	1.6271	0.0001	Both significant
ESR2_1	28759	32426	0.8869	0.0001	32521	29530	1.1013	0.0001	Only downstream significant
ESRRA_known1	21854	19858.4	1.1005	0.0014	22959	18124.2	1.2667	0.0001	Both significant
ESRRA_known10	8215	10508.7	0.7818	0.0001	8067	9716.4	0.8303	0.0001	None significant
ESRRA_known11	4133	5995.23	0.6894	0.0001	4057	5546.57	0.7315	0.0001	None significant
ESRRA_known2	7069	10825.4	0.653	0.0001	7341	9948.79	0.7379	0.0001	None significant
ESRRA_known3	13050	14033.8	0.9299	0.003	14250	12824.9	1.1111	0.0001	Only downstream significant
ESRRA_known4	93478	79144.4	1.1811	0.0001	106008	71811.7	1.4762	0.0001	Both significant
ESRRA_known5	11006	12365.1	0.8901	0.0001	11007	11378.6	0.9673	0.2055	None significant
ESRRA_known6	14039	13514.7	1.0388	0.1169	16974	12349.8	1.3744	0.0001	Only downstream significant
ESRRA_known7	5945	7481.11	0.7947	0.0001	5743	6879.42	0.8348	0.0001	None significant
ESRRA_known8	10405	11765.6	0.8844	0.0001	9893	10832.7	0.9133	0.012	None significant
ESRRA_known9	20321	18327.2	1.1088	0.0001	19408	16779	1.1567	0.0001	Both significant
ESRRB_1	11814	13927.4	0.8483	0.0001	12853	12762.6	1.0071	0.407	None significant
ESRRB_2	3893	6142.01	0.6339	0.0001	3892	5676.73	0.6857	0.0001	None significant
ESRRG_1	16226	14965.1	1.0843	0.0029	15781	13717.1	1.1504	0.0001	Both significant
ESRRG_2	10159	13027	0.7799	0.0001	10035	11983.8	0.8374	0.0001	None significant
ESRRG_3	4672	6066.53	0.7702	0.0001	4480	5590.5	0.8014	0.0001	None significant
ESX1_1	1055	2088.2	0.5055	0.0001	419	1970.63	0.213	0.0001	None significant
ESX1_2	1800	1978.26	0.9099	0.0916	765	1838.92	0.4163	0.0001	None significant
ESX1_3	1467	1857.23	0.79	0.003	635	1730.13	0.3674	0.0001	None significant
ETS_1	32087	24597.2	1.3045	0.0001	23733	22504.7	1.0546	0.0059	Only upstream significant
ETS_2	19751	14751.4	1.3389	0.0001	13836	13475.9	1.0267	0.1289	Only upstream significant
ETS_known1	27309	19121.8	1.4281	0.0001	19798	17542.7	1.1286	0.0001	Both significant
ETS_known10	30785	11681	2.6353	0.0001	11022	10576.5	1.0421	0.1466	Only upstream significant
ETS_known11	20065	6612.45	3.0341	0.0001	7109	5978.15	1.1891	0.0001	Both significant
ETS_known12	18546	6109.39	3.0353	0.0001	6391	5508.11	1.1603	0.0001	Both significant
ETS_known13	26527	12351.8	2.1475	0.0001	20718	11201.6	1.8495	0.0001	Both significant
ETS_known14	18357	7137.18	2.5718	0.0001	6798	6452.74	1.0535	0.0946	Only upstream significant
ETS_known15	20495	11287.3	1.8157	0.0001	15370	10282.8	1.4947	0.0001	Both significant
ETS_known16	16516	6160.95	2.6805	0.0001	6091	5585.38	1.0905	0.0104	Only upstream significant
ETS_known17	25887	16278.5	1.5902	0.0001	22385	14829.3	1.5095	0.0001	Both significant
ETS_known18	19599	7125.75	2.7502	0.0001	7913	6430.19	1.2306	0.0001	Both significant
ETS_known2	40838	16979.8	2.405	0.0001	23198	15401.3	1.5062	0.0001	Both significant
ETS_known3	19519	10570.2	1.8465	0.0001	10335	9610.88	1.0753	0.0149	Only upstream significant
ETS_known4	34684	32808.7	1.0572	0.0001	32391	30006	1.0795	0.0014	Both significant
ETS_known5	15214	17517.2	0.8685	0.0001	12956	16116	0.8039	0.0001	None significant
ETS_known6	56130	28305.4	1.983	0.0001	42076	25657.1	1.6399	0.0001	Both significant
ETS_known7	22511	8079.2	2.7861	0.0001	11896	7286.52	1.6325	0.0001	Both significant
ETS_known9	37964	16464.1	2.3058	0.0001	21920	14916.9	1.4694	0.0001	Both significant
ETV1_1	18518	5909.26	3.1334	0.0001	6430	5329.07	1.2066	0.0001	Both significant
ETV2_1	11994	5737.02	2.0904	0.0001	4385	5243.22	0.8363	0.0001	Only upstream significant
ETV3_1	16376	5856.11	2.7961	0.0001	5938	5292.13	1.122	0.0001	Both significant
ETV4_2	18891	6041.7	3.1264	0.0001	6526	5417.9	1.2045	0.0001	Both significant
ETV5_1	19739	6343.75	3.1112	0.0001	7776	5694.68	1.3654	0.0001	Both significant
ETV6_1	47554	24293.8	1.9574	0.0001	34863	22124.1	1.5758	0.0001	Both significant
ETV6_2	22505	10160.9	2.2147	0.0001	11338	9241.16	1.2269	0.0001	Both significant
ETV7_1	11713	10664	1.0984	0.0001	7516	9813.01	0.7659	0.0001	Only upstream significant
EVX1_1	1507	3192.59	0.4722	0.0001	1202	2953.86	0.4071	0.0001	None significant
EVX1_2	1027	1937.51	0.5303	0.0001	774	1801.31	0.43	0.0001	None significant
EVX2_1	3088	3239.44	0.9533	0.2576	1492	3003.58	0.4969	0.0001	None significant
EVX2_2	1159	2131.68	0.5439	0.0001	813	1983.4	0.4102	0.0001	None significant
FEV_1	9137	6185.64	1.4771	0.0001	4592	5668	0.8102	0.0001	Only upstream significant
FEV_2	17327	5536.76	3.1291	0.0001	5762	4981.63	1.1566	0.0001	Both significant
FIGLA_1	10737	15324.7	0.7007	0.0001	11090	14059.8	0.7888	0.0001	None significant
FLI1_1	18684	6648.56	2.81	0.0001	6772	5995.19	1.1296	0.0014	Both significant
FLI1_2	11645	5818.58	2.0012	0.0001	8904	5288.52	1.6835	0.0001	Both significant
FLI1_3	17395	6220.97	2.7959	0.0001	5989	5622.33	1.0652	0.0494	Only upstream significant
FLI1_4	12669	6257.21	2.0245	0.0001	9553	5704.42	1.6745	0.0001	Both significant
FOXA_known1	3633	7936.86	0.4578	0.0001	2564	7456.48	0.3439	0.0001	None significant
FOXA_known2	3434	8750.81	0.3925	0.0001	2366	8188.52	0.289	0.0001	None significant
FOXA_known3	4272	11016.4	0.3878	0.0001	3052	10294.9	0.2965	0.0001	None significant
FOXA_known4	7930	15650.3	0.5067	0.0001	5550	14666.1	0.3785	0.0001	None significant
FOXA_known5	3897	10146.8	0.3841	0.0001	2942	9522.88	0.309	0.0001	None significant
FOXA_known6	3051	8735.97	0.3493	0.0001	2109	8147.23	0.259	0.0001	None significant
FOXA_known7	4187	8714.76	0.4805	0.0001	2615	8165.54	0.3203	0.0001	None significant
FOXB1_1	5963	7532.75	0.7916	0.0001	4643	6999.55	0.6634	0.0001	None significant
FOXB1_2	1693	4926.94	0.3438	0.0001	882	4641.77	0.1902	0.0001	None significant
FOXB1_3	1690	4665.29	0.3624	0.0001	841	4377.41	0.1923	0.0001	None significant
FOXB1_4	1799	4012.02	0.4485	0.0001	1083	3755.56	0.2886	0.0001	None significant
FOXC1_1	3454	6671.91	0.5178	0.0001	2398	6223.4	0.3854	0.0001	None significant
FOXC1_2	2592	2838.27	0.9133	0.0345	3019	2631.04	1.1474	0.0059	None significant
FOXC1_3	4729	8634.16	0.5478	0.0001	3094	8101.95	0.382	0.0001	None significant
FOXC1_4	1056	3310.86	0.3192	0.0001	687	3104.4	0.2215	0.0001	None significant
FOXC1_5	1813	4936.7	0.3674	0.0001	972	4628.38	0.2102	0.0001	None significant
FOXC1_6	3383	6334.06	0.5342	0.0001	2255	5938.43	0.3798	0.0001	None significant
FOXC2_1	886	3167.76	0.2799	0.0001	663	2962.1	0.2241	0.0001	None significant
FOXC2_2	3414	6534.18	0.5226	0.0001	2290	6113.39	0.3747	0.0001	None significant
FOXC2_3	3193	7102.25	0.4497	0.0001	1870	6690.83	0.2796	0.0001	None significant
FOXD1_1	3562	9161.33	0.3889	0.0001	2669	8569.43	0.3115	0.0001	None significant
FOXD1_2	1818	3446.21	0.5277	0.0001	1352	3219.94	0.4201	0.0001	None significant
FOXD2_1	1833	4644.06	0.3948	0.0001	1017	4355.21	0.2337	0.0001	None significant
FOXD2_2	1565	3008.26	0.5204	0.0001	1172	2803.84	0.4182	0.0001	None significant
FOXD3_1	3112	6084.73	0.5115	0.0001	2166	5730.88	0.3781	0.0001	None significant
FOXD3_2	3028	5754.71	0.5263	0.0001	2107	5387.65	0.3912	0.0001	None significant
FOXD3_3	1903	4606.49	0.4132	0.0001	1105	4313.04	0.2564	0.0001	None significant
FOXD3_4	1565	3003.63	0.5212	0.0001	1172	2812.19	0.417	0.0001	None significant
FOXF1_1	2832	5493.7	0.5156	0.0001	2034	5145.38	0.3954	0.0001	None significant
FOXF2_1	3621	6364.47	0.569	0.0001	2459	5915.62	0.4158	0.0001	None significant
FOXF2_2	2746	5150.29	0.5333	0.0001	2149	4813.78	0.4465	0.0001	None significant
FOXG1_1	3314	6222.01	0.5327	0.0001	1728	5868.82	0.2946	0.0001	None significant
FOXG1_2	3966	5165.37	0.7679	0.0001	4014	4756.85	0.8439	0.0001	None significant
FOXG1_3	2635	6069.04	0.4343	0.0001	1782	5706.52	0.3124	0.0001	None significant
FOXG1_4	8061	8781.01	0.918	0.0105	9284	8071.09	1.1503	0.0001	Only downstream significant
FOXG1_5	1565	3004.69	0.521	0.0001	1172	2801.7	0.4185	0.0001	None significant
FOXI1_1	3803	7696.3	0.4942	0.0001	2487	7198.94	0.3456	0.0001	None significant
FOXI1_2	3346	6169.53	0.5424	0.0001	2359	5782.71	0.408	0.0001	None significant
FOXI1_3	1565	3013.84	0.5194	0.0001	1172	2788.85	0.4205	0.0001	None significant
FOXI1_4	2227	4359.77	0.5109	0.0001	1697	4074.19	0.4167	0.0001	None significant
FOXJ1_1	3079	6485.05	0.4749	0.0001	2038	6071.23	0.3358	0.0001	None significant
FOXJ1_2	3935	7379.93	0.5333	0.0001	2565	6921.04	0.3707	0.0001	None significant
FOXJ2_1	5334	11375.9	0.4689	0.0001	3361	10706.5	0.314	0.0001	None significant
FOXJ2_2	1483	3177.79	0.4668	0.0001	1133	2988.31	0.3794	0.0001	None significant
FOXJ2_3	3686	6521	0.5653	0.0001	2359	6156.18	0.3833	0.0001	None significant
FOXJ2_4	1583	2777.24	0.5701	0.0001	1077	2590.5	0.416	0.0001	None significant
FOXJ2_5	3222	5495.73	0.5863	0.0001	2229	5152.84	0.4327	0.0001	None significant
FOXJ3_1	4982	8310.1	0.5996	0.0001	3499	7769.58	0.4504	0.0001	None significant
FOXJ3_2	1160	2016.87	0.5754	0.0001	761	1877.39	0.4057	0.0001	None significant
FOXJ3_3	2735	5513.4	0.4962	0.0001	1794	5158.77	0.3479	0.0001	None significant
FOXJ3_4	3182	5800.05	0.5487	0.0001	2128	5451.34	0.3905	0.0001	None significant
FOXJ3_5	2545	3595.55	0.7079	0.0001	2295	3326.04	0.6901	0.0001	None significant
FOXJ3_6	3566	6851.45	0.5205	0.0001	2531	6422.76	0.3942	0.0001	None significant
FOXJ3_7	1424	2806.57	0.5076	0.0001	995	2638.29	0.3774	0.0001	None significant
FOXJ3_8	4806	7548.4	0.6367	0.0001	3284	7076.14	0.4642	0.0001	None significant
FOXK1_1	4147	7871.27	0.5269	0.0001	2778	7371.44	0.3769	0.0001	None significant
FOXK1_2	3077	3294.55	0.934	0.1134	3128	3040.07	1.0289	0.3028	None significant
FOXK1_3	4218	4592.46	0.9185	0.0405	4294	4217.88	1.018	0.3709	None significant
FOXK1_4	1565	3006.35	0.5207	0.0001	1172	2811.21	0.4171	0.0001	None significant
FOXL1_1	2788	5193.39	0.5369	0.0001	1517	4902.47	0.3096	0.0001	None significant
FOXL1_2	455	999.504	0.4558	0.0001	181	942.384	0.1929	0.0001	None significant
FOXL1_3	3709	7380.26	0.5026	0.0001	2252	6902.54	0.3264	0.0001	None significant
FOXL1_4	1565	3012.43	0.5197	0.0001	1172	2801.06	0.4186	0.0001	None significant
FOXL1_5	3408	6696.87	0.509	0.0001	2111	6292.11	0.3356	0.0001	None significant
FOXM1_1	2251	3196.51	0.7043	0.0001	1827	2959.15	0.6175	0.0001	None significant
FOXN1_1	8021	3729.8	2.1502	0.0001	7189	3388.62	2.1212	0.0001	Both significant
FOXO1_1	2555	3968.31	0.6439	0.0001	1927	3717.1	0.5185	0.0001	None significant
FOXO1_2	3344	5692.61	0.5875	0.0001	2548	5328.59	0.4783	0.0001	None significant
FOXO1_3	1281	2506.91	0.5112	0.0001	970	2334.84	0.4157	0.0001	None significant
FOXO1_4	1323	2727.77	0.4852	0.0001	886	2552.47	0.3474	0.0001	None significant
FOXO1_5	22967	20169.6	1.1387	0.0001	24583	18455.8	1.332	0.0001	Both significant
FOXO3_1	3692	5929.08	0.6228	0.0001	2386	5544.23	0.4305	0.0001	None significant
FOXO3_2	2689	5414.68	0.4967	0.0001	1708	5078.31	0.3365	0.0001	None significant
FOXO3_3	2724	4948.67	0.5505	0.0001	2257	4616.71	0.489	0.0001	None significant
FOXO3_4	1028	2237.83	0.4596	0.0001	752	2105.8	0.3574	0.0001	None significant
FOXO3_5	1818	3449.44	0.5272	0.0001	1352	3216.48	0.4205	0.0001	None significant
FOXO3_6	22319	19184	1.1634	0.0001	22403	17562.6	1.2756	0.0001	Both significant
FOXO4_1	3350	4868.52	0.6882	0.0001	2699	4551.95	0.593	0.0001	None significant
FOXO4_2	3892	6053.76	0.643	0.0001	2636	5649.15	0.4667	0.0001	None significant
FOXO4_3	1338	2575.38	0.5197	0.0001	991	2380.19	0.4166	0.0001	None significant
FOXO4_4	1565	3008.27	0.5204	0.0001	1172	2800.31	0.4187	0.0001	None significant
FOXO4_5	18431	16325.5	1.129	0.0001	19914	14909.1	1.3357	0.0001	Both significant
FOXO6_1	1426	2884.16	0.4946	0.0001	933	2693.09	0.3467	0.0001	None significant
FOXO6_2	1565	3007.94	0.5204	0.0001	1172	2797.71	0.4191	0.0001	None significant
FOXO6_3	25094	21261.4	1.1803	0.0001	27484	19379.8	1.4182	0.0001	Both significant
FOXP3_1	5193	8694.78	0.5973	0.0001	4369	8072.81	0.5413	0.0001	None significant
FOXQ1_1	1829	4071.04	0.4494	0.0001	1186	3812.86	0.3112	0.0001	None significant
FOXQ1_2	1335	2964.41	0.4505	0.0001	851	2789.45	0.3053	0.0001	None significant
FOX_1	3245	7270.87	0.4464	0.0001	2297	6817.77	0.337	0.0001	None significant
GATA_known1	12675	9163.58	1.3832	0.0001	14476	8311.64	1.7416	0.0001	Both significant
GATA_known10	5762	8186.87	0.7038	0.0001	5363	7620.56	0.7038	0.0001	None significant
GATA_known11	993	1893.02	0.5248	0.0001	749	1770.75	0.4233	0.0001	None significant
GATA_known14	6600	8361.86	0.7893	0.0001	5392	7760.3	0.6949	0.0001	None significant
GATA_known15	2665	4317.13	0.6174	0.0001	1884	4012.28	0.4697	0.0001	None significant
GATA_known16	3884	6751.76	0.5753	0.0001	2866	6335.14	0.4525	0.0001	None significant
GATA_known17	2367	4597.24	0.515	0.0001	1606	4282.93	0.3751	0.0001	None significant
GATA_known18	2486	4114.58	0.6043	0.0001	1586	3827.14	0.4146	0.0001	None significant
GATA_known2	10333	7636.06	1.3531	0.0001	12453	6941.49	1.7939	0.0001	Both significant
GATA_known20	1260	1984.99	0.6349	0.0001	979	1845.74	0.5307	0.0001	None significant
GATA_known21	1187	1893.7	0.627	0.0001	899	1762.57	0.5103	0.0001	None significant
GATA_known22	1054	1810.58	0.5824	0.0001	810	1687.6	0.4803	0.0001	None significant
GATA_known3	5181	4958.79	1.0448	0.1412	4669	4533.33	1.0299	0.2612	None significant
GATA_known4	3122	3898.17	0.8009	0.0001	2868	3596.09	0.7976	0.0001	None significant
GATA_known5	6941	5571.44	1.2458	0.0001	5451	5143.6	1.0598	0.128	Only upstream significant
GATA_known6	3450	4982.58	0.6925	0.0001	2718	4615.76	0.5889	0.0001	None significant
GATA_known7	2059	3202.07	0.6431	0.0001	1648	2970.5	0.5549	0.0001	None significant
GATA_known8	1515	2487.58	0.6092	0.0001	1056	2317.45	0.4559	0.0001	None significant
GATA_known9	1525	1841.18	0.8284	0.0045	1095	1714.32	0.6389	0.0001	None significant
GBX1_1	2025	2476.54	0.8177	0.0105	889	2308.49	0.3854	0.0001	None significant
GBX1_2	1328	1707.65	0.7778	0.0015	574	1600.64	0.359	0.0001	None significant
GBX1_3	1552	1938.73	0.8006	0.003	689	1803.12	0.3825	0.0001	None significant
GBX2_1	3047	2926.16	1.0413	0.2876	1165	2713.52	0.4295	0.0001	None significant
GBX2_2	1512	2045.98	0.7391	0.0001	716	1906.35	0.3759	0.0001	None significant
GBX2_3	1235	1676.94	0.7366	0.0001	544	1564.96	0.348	0.0001	None significant
GBX2_4	1731	2027.47	0.8538	0.0117	845	1891.97	0.4469	0.0001	None significant
GBX2_5	1433	2022.49	0.7087	0.0001	746	1873.31	0.3985	0.0001	None significant
GCM1_1	25955	16989.8	1.5276	0.0001	29611	15365	1.9271	0.0001	Both significant
GCM1_2	7671	6919.54	1.1086	0.0001	9337	6302.24	1.4815	0.0001	Both significant
GCM1_3	24975	20240.1	1.2339	0.0001	26604	18422.8	1.4441	0.0001	Both significant
GCM1_4	12028	10154.9	1.1844	0.0001	14726	9278.68	1.587	0.0001	Both significant
GCM2_1	12264	8484.8	1.4454	0.0001	14113	7700.04	1.8327	0.0001	Both significant
GCM_1	11692	11515.5	1.0153	0.3361	10928	10540.1	1.0368	0.138	None significant
GFI1B_1	4063	4935.36	0.8233	0.0001	2341	4590.16	0.5101	0.0001	None significant
GFI1_1	15197	14983.3	1.0143	0.3511	9869	13863.2	0.7119	0.0001	None significant
GFI1_2	8574	8152.77	1.0517	0.0942	7035	7518.53	0.9357	0.0524	None significant
GFI1_3	6629	5840.82	1.1349	0.0014	3188	5410.42	0.5893	0.0001	Only upstream significant
GLI2_1	50136	36118	1.3881	0.0001	51335	32721.9	1.5688	0.0001	Both significant
GLI2_2	20691	14368.5	1.44	0.0001	21208	13030.8	1.6275	0.0001	Both significant
GLIS1_1	32759	19739.5	1.6595	0.0001	34127	17849.3	1.9119	0.0001	Both significant
GLIS2_1	44199	30804.4	1.4348	0.0001	49207	27799.7	1.77	0.0001	Both significant
GLIS2_2	76948	46056.1	1.6707	0.0001	78385	41615.4	1.8835	0.0001	Both significant
GLIS3_1	26404	19179.2	1.3767	0.0001	28727	17374.2	1.6534	0.0001	Both significant
GLI_1	31512	25420.2	1.2396	0.0001	32080	23080.9	1.3899	0.0001	Both significant
GMEB1_1	24460	10515.9	2.3259	0.0001	18167	9467.98	1.9187	0.0001	Both significant
GMEB2_1	1754	825.398	2.1237	0.0001	866	749.906	1.1546	0.054	Only upstream significant
GMEB2_2	5340	2372.99	2.2498	0.0001	2777	2179.97	1.2737	0.0001	Both significant
GMEB2_3	6301	2363.97	2.6647	0.0001	3601	2133.09	1.6878	0.0001	Both significant
GMEB2_4	674	267.463	2.5143	0.0001	172	248.834	0.6925	0.0435	Only upstream significant
GRHL1_1	6600	5115.53	1.2901	0.0001	5860	4674.58	1.2535	0.0001	Both significant
GRHL1_2	1884	1700.32	1.108	0.0795	1624	1587.48	1.023	0.387	None significant
GRHL1_3	1781	2013.17	0.8847	0.0715	1411	1867.09	0.7559	0.0015	None significant
GSC2_1	2217	2182.8	1.0157	0.4214	1660	2024.53	0.82	0.003	None significant
GSC_1	3320	3484.67	0.9528	0.2531	2687	3225.76	0.833	0.0105	None significant
GSC_2	2221	2253.65	0.9855	0.4188	1704	2092.19	0.8145	0.003	None significant
GSX1_1	1485	2436.11	0.6097	0.0001	989	2271.76	0.4356	0.0001	None significant
GSX2_1	1532	2701.92	0.5672	0.0001	970	2522.86	0.3847	0.0001	None significant
GSX2_2	1562	2402.3	0.6504	0.0001	786	2229.39	0.3529	0.0001	None significant
GTF2A_1	6760	5594.37	1.2083	0.0001	5221	5181.89	1.0075	0.4246	Only upstream significant
GTF2I_1	30545	22878.6	1.3351	0.0001	29396	20767.4	1.4155	0.0001	Both significant
GZF1_1	2061	1608.85	1.2809	0.0001	1513	1482.04	1.0209	0.3929	Only upstream significant
HAND1_1	12744	15415.8	0.8267	0.0001	13703	14186.5	0.9659	0.1515	None significant
HAND1_2	6452	8163.58	0.7904	0.0001	6472	7529.14	0.8596	0.0001	None significant
HBP1_1	4679	6922.09	0.676	0.0001	2841	6463.06	0.4397	0.0001	None significant
HDX_1	4687	6567.93	0.7137	0.0001	3945	6122.33	0.6444	0.0001	None significant
HERPUD1_1	18525	16910.5	1.0955	0.0014	17029	15482.3	1.0999	0.0044	Both significant
HES1_1	43589	27918.5	1.5613	0.0001	39737	25336.1	1.5684	0.0001	Both significant
HES5_1	13083	8858.37	1.4769	0.0001	11390	8051.66	1.4146	0.0001	Both significant
HES7_1	14422	9494.62	1.5189	0.0001	12131	8604.69	1.4098	0.0001	Both significant
HESX1_1	1288	1842.52	0.6992	0.0001	559	1716.55	0.326	0.0001	None significant
HESX1_2	1039	2446.3	0.425	0.0001	493	2293.58	0.2153	0.0001	None significant
HEY1_known1	15761	7596.6	2.0746	0.0001	9156	6882.24	1.3303	0.0001	Both significant
HEY2_1	26509	13257.5	1.9995	0.0001	18878	11981.4	1.5756	0.0001	Both significant
HEY2_2	13182	7978.54	1.6521	0.0001	8773	7252.31	1.2097	0.0001	Both significant
HIC1_3	19200	21107	0.9097	0.0015	18143	19336.5	0.9383	0.0045	None significant
HIC1_4	51113	45902.8	1.1135	0.0001	48511	41953.7	1.1563	0.0001	Both significant
HIC1_5	8681	11261.4	0.7709	0.0001	8399	10336.8	0.8126	0.0001	None significant
HIC2_1	17541	15019.3	1.1679	0.0001	16818	13672.7	1.23	0.0001	Both significant
HIF1A_1	21548	10632.5	2.0265	0.0001	16575	9583.8	1.7294	0.0001	Both significant
HIF1A_2	31551	15208.8	2.0745	0.0001	23657	13758.5	1.7194	0.0001	Both significant
HIF1A__ARNT_1	10701	5104.73	2.0961	0.0001	6861	4623.01	1.484	0.0001	Both significant
HINFP_1	6289	2556.94	2.459	0.0001	4814	2313.36	2.0805	0.0001	Both significant
HINFP_2	62872	28748.8	2.1869	0.0001	58060	25939.2	2.2383	0.0001	Both significant
HINFP_3	140496	70604.8	1.9899	0.0001	134976	63851.7	2.1139	0.0001	Both significant
HINFP_4	145575	70518	2.0644	0.0001	136301	63686.4	2.1402	0.0001	Both significant
HLF_1	1441	1432.28	1.0061	0.4626	858	1334.8	0.6431	0.0001	None significant
HLF_2	3240	1996.49	1.6225	0.0001	1083	1852.93	0.5847	0.0001	Only upstream significant
HLF_3	1711	1662.83	1.029	0.376	676	1545.11	0.4379	0.0001	None significant
HLF_4	788	845.945	0.9316	0.2804	432	787.615	0.5491	0.0001	None significant
HLTF_1	2943	3204.65	0.9184	0.0675	2441	2960.25	0.8247	0.0001	None significant
HLX_1	948	2241.43	0.4232	0.0001	463	2111.91	0.2196	0.0001	None significant
HMBOX1_1	2353	3316.21	0.7096	0.0001	1806	3093.81	0.5839	0.0001	None significant
HMBOX1_2	1215	1653.56	0.7349	0.0015	756	1533.91	0.4932	0.0001	None significant
HMGA1_1	2109	2500.19	0.8436	0.0001	1422	2343.75	0.6069	0.0001	None significant
HMX1_1	2571	4145.94	0.6202	0.0001	1931	3846.35	0.5022	0.0001	None significant
HMX1_2	1377	2415.43	0.5703	0.0001	851	2253.18	0.378	0.0001	None significant
HMX2_1	2449	3880.28	0.6312	0.0001	1394	3646.18	0.3825	0.0001	None significant
HMX2_2	1786	2774.81	0.6438	0.0001	1165	2585.82	0.4507	0.0001	None significant
HMX3_1	6150	5810.48	1.0584	0.0734	5274	5330.18	0.9895	0.4233	None significant
HMX3_2	2239	3874.57	0.578	0.0001	1333	3628.68	0.3675	0.0001	None significant
HMX3_3	2146	3048.61	0.704	0.0001	1573	2844.07	0.5532	0.0001	None significant
HNF1A_1	1847	3789.59	0.4875	0.0001	1227	3547.25	0.3461	0.0001	None significant
HNF1A_2	2258	2357.58	0.9578	0.2999	1398	2196.51	0.6366	0.0001	None significant
HNF1A_3	2496	2506.57	0.9958	0.4948	1657	2324.42	0.713	0.0001	None significant
HNF1A_4	1380	3274.9	0.4216	0.0001	682	3076.29	0.2219	0.0001	None significant
HNF1B_1	1316	2920.3	0.4508	0.0001	816	2745.7	0.2974	0.0001	None significant
HNF1B_2	2248	2995.89	0.7504	0.0001	1957	2783.36	0.7032	0.0015	None significant
HNF1B_3	1139	2651.99	0.4297	0.0001	450	2478.81	0.1819	0.0001	None significant
HNF1B_4	1429	3229.66	0.4426	0.0001	568	3029.61	0.1878	0.0001	None significant
HNF1_1	1947	4128.18	0.4718	0.0001	944	3856.64	0.245	0.0001	None significant
HNF1_2	2843	5341.37	0.5323	0.0001	1642	4969.86	0.3305	0.0001	None significant
HNF1_3	2523	5216.38	0.4838	0.0001	1595	4844.1	0.3294	0.0001	None significant
HNF1_4	3257	6239.96	0.522	0.0001	1829	5845.28	0.313	0.0001	None significant
HNF4_known1	39551	31296.7	1.2637	0.0001	39836	28482.6	1.3986	0.0001	Both significant
HNF4_known13	12931	14419.9	0.8968	0.0001	13009	13207	0.985	0.319	None significant
HNF4_known14	22524	20775.1	1.0842	0.0001	22601	18991.6	1.19	0.0001	Both significant
HNF4_known15	25535	21918.4	1.165	0.0001	31596	19887.2	1.5887	0.0001	Both significant
HNF4_known16	6499	7586.22	0.8567	0.0001	5948	7027.66	0.8464	0.0001	None significant
HNF4_known17	18168	14893.5	1.2198	0.0001	16928	13617.6	1.2431	0.0001	Both significant
HNF4_known18	9144	9674.55	0.9452	0.0734	8466	8925.48	0.9485	0.1022	None significant
HNF4_known19	11568	10593.1	1.092	0.0074	10065	9709.85	1.0366	0.1586	None significant
HNF4_known2	12931	14425.9	0.8964	0.0001	13009	13231.2	0.9832	0.3014	None significant
HNF4_known20	11703	11882	0.9849	0.3251	11360	10937.5	1.0386	0.1467	None significant
HNF4_known21	8113	8338.42	0.973	0.2762	6939	7711.27	0.8999	0.012	None significant
HNF4_known22	12335	12335.8	0.9999	0.5084	11786	11324	1.0408	0.1171	None significant
HNF4_known23	16523	15634	1.0569	0.0269	16488	14324.1	1.1511	0.0001	Only downstream significant
HNF4_known24	16394	16007.2	1.0242	0.2154	18099	14612.6	1.2386	0.0001	Only downstream significant
HNF4_known25	7275	8380.6	0.8681	0.0001	7734	7677.39	1.0074	0.412	None significant
HNF4_known26	12620	13904.7	0.9076	0.0001	12507	12731	0.9824	0.299	None significant
HNF4_known3	18684	16654.9	1.1218	0.0001	15946	15314.8	1.0412	0.0838	Only upstream significant
HNF4_known4	6801	7395.91	0.9196	0.0225	6663	6808.89	0.9786	0.3265	None significant
HNF4_known5	19594	22652.1	0.865	0.0001	22090	20726.6	1.0658	0.0044	Only downstream significant
HNF4_known6	14591	17519.4	0.8329	0.0001	15791	16054.8	0.9836	0.2796	None significant
HNF4_known7	15248	17950.3	0.8495	0.0001	17226	16415.3	1.0494	0.0405	None significant
HNF4_known8	5746	7655.39	0.7506	0.0001	6657	7031.71	0.9467	0.0645	None significant
HNF4_known9	21786	22050.6	0.988	0.3126	21673	20186.6	1.0736	0.0001	Only downstream significant
HOMEZ_1	1003	1076.4	0.9319	0.2922	980	997.495	0.9825	0.4517	None significant
HOMEZ_2	826	681.982	1.2109	0.0462	566	631.409	0.8966	0.2081	None significant
HOXA10_1	1818	3719.38	0.4889	0.0001	1122	3524.1	0.3186	0.0001	None significant
HOXA10_2	983	1531.04	0.6423	0.0001	795	1443.57	0.551	0.0001	None significant
HOXA10_3	1396	2918.39	0.4785	0.0001	904	2735.35	0.3307	0.0001	None significant
HOXA11_1	1410	2078.73	0.6785	0.0001	983	1956.83	0.5026	0.0001	None significant
HOXA11_2	947	1246.35	0.76	0.006	747	1150.87	0.6494	0.0015	None significant
HOXA11_3	1753	3074.06	0.5704	0.0001	1297	2859.27	0.4538	0.0001	None significant
HOXA13_1	1737	2265.71	0.7668	0.0001	1108	2112.81	0.5246	0.0001	None significant
HOXA13_2	1902	2631.96	0.7228	0.0001	909	2469.95	0.3683	0.0001	None significant
HOXA13_3	1263	1764.65	0.7159	0.0001	1052	1652.34	0.6369	0.0001	None significant
HOXA13_4	1945	2675.37	0.7271	0.0001	889	2494.96	0.3566	0.0001	None significant
HOXA13_5	1225	1778.25	0.6891	0.0001	985	1648.98	0.5976	0.0001	None significant
HOXA1_1	1599	2839.11	0.5634	0.0001	1009	2664.8	0.3789	0.0001	None significant
HOXA1_2	978	1568.1	0.6239	0.0001	574	1464.96	0.3922	0.0001	None significant
HOXA2_1	1679	3269.22	0.5137	0.0001	1242	3076.78	0.4039	0.0001	None significant
HOXA2_2	1423	2341.88	0.6078	0.0001	1208	2175.4	0.5555	0.0001	None significant
HOXA2_3	871	1977.81	0.4407	0.0001	773	1851.68	0.4178	0.0001	None significant
HOXA3_1	1861	1903.01	0.9779	0.3746	1500	1754.57	0.855	0.0195	None significant
HOXA3_2	1286	2379.66	0.5406	0.0001	879	2217.02	0.3968	0.0001	None significant
HOXA3_3	1344	2377.18	0.5656	0.0001	693	2208.5	0.3141	0.0001	None significant
HOXA4_1	560	1127.46	0.4971	0.0001	216	1051.72	0.2061	0.0001	None significant
HOXA4_2	1312	2674.97	0.4907	0.0001	830	2506.18	0.3314	0.0001	None significant
HOXA5_1	13493	13723.1	0.9832	0.3641	11311	12653.9	0.8939	0.0225	None significant
HOXA5_2	901	1200.49	0.7507	0.0015	484	1117.58	0.4336	0.0001	None significant
HOXA5_3	1709	3170.46	0.5392	0.0001	1226	2961.99	0.4141	0.0001	None significant
HOXA6_1	1636	2811.39	0.5821	0.0001	1166	2626.51	0.4441	0.0001	None significant
HOXA7_1	1316	1385.34	0.95	0.2413	921	1287.26	0.7157	0.0001	None significant
HOXA7_2	1564	2553.46	0.6127	0.0001	1030	2382.22	0.4326	0.0001	None significant
HOXA7_3	1456	2291.49	0.6356	0.0001	777	2146.39	0.3623	0.0001	None significant
HOXA9_1	2121	4074.75	0.5206	0.0001	1348	3815.52	0.3535	0.0001	None significant
HOXB13_1	2965	3926.97	0.7551	0.0001	1541	3700	0.4166	0.0001	None significant
HOXB13_2	1855	2594.54	0.7151	0.0001	867	2430.68	0.357	0.0001	None significant
HOXB13_3	1373	1867.58	0.7353	0.0001	979	1736.29	0.5641	0.0001	None significant
HOXB2_1	1322	2203.42	0.6002	0.0001	844	2043.4	0.4133	0.0001	None significant
HOXB3_1	3192	4857.26	0.6572	0.0001	1764	4539.45	0.3887	0.0001	None significant
HOXB3_2	1689	2919.37	0.5787	0.0001	1118	2723.77	0.4107	0.0001	None significant
HOXB4_1	1486	2593.28	0.5732	0.0001	854	2420.34	0.3531	0.0001	None significant
HOXB5_1	1371	2963.45	0.4628	0.0001	1004	2781.01	0.3612	0.0001	None significant
HOXB5_2	986	1984.54	0.4971	0.0001	776	1852.87	0.4191	0.0001	None significant
HOXB6_1	1642	2556.45	0.6424	0.0001	1093	2376.75	0.4601	0.0001	None significant
HOXB7_1	1181	2302.22	0.5132	0.0001	483	2157.77	0.2242	0.0001	None significant
HOXB8_1	1659	3385.19	0.4902	0.0001	1005	3164.95	0.3178	0.0001	None significant
HOXB9_1	2350	4565.59	0.5148	0.0001	1557	4269.39	0.3648	0.0001	None significant
HOXC10_1	1663	2106.01	0.7897	0.0045	1049	1977.15	0.5308	0.0001	None significant
HOXC10_2	1607	2966.15	0.5419	0.0001	1059	2767.44	0.3829	0.0001	None significant
HOXC10_3	1357	2655.22	0.5113	0.0001	826	2487.56	0.3323	0.0001	None significant
HOXC10_4	863	1425.97	0.6055	0.0001	628	1319.81	0.4762	0.0001	None significant
HOXC10_5	826	1565.34	0.528	0.0001	638	1467.44	0.4352	0.0001	None significant
HOXC10_6	1219	2593.83	0.4702	0.0001	695	2423.76	0.287	0.0001	None significant
HOXC11_1	1355	1960.55	0.6913	0.0001	935	1823.44	0.513	0.0001	None significant
HOXC11_2	937	1308.91	0.7161	0.0015	685	1235.56	0.5548	0.0001	None significant
HOXC11_3	1491	3220.17	0.4632	0.0001	970	3019.12	0.3215	0.0001	None significant
HOXC11_4	886	1045.34	0.8477	0.0752	710	971.741	0.7309	0.0001	None significant
HOXC11_5	1622	3175.39	0.511	0.0001	1212	2969.84	0.4083	0.0001	None significant
HOXC12_1	1525	1763.72	0.8647	0.0652	1060	1635.09	0.6485	0.0001	None significant
HOXC12_2	1143	2257.28	0.5066	0.0001	687	2117.77	0.3247	0.0001	None significant
HOXC12_3	965	1125.8	0.8573	0.0717	787	1047.2	0.7518	0.006	None significant
HOXC13_1	1572	2678.25	0.5871	0.0001	1041	2494.33	0.4176	0.0001	None significant
HOXC13_2	1820	2548.43	0.7143	0.0001	769	2398.78	0.3209	0.0001	None significant
HOXC13_3	1227	1871.94	0.6557	0.0001	1084	1747.96	0.6204	0.0001	None significant
HOXC4_1	1462	2361.28	0.6193	0.0001	703	2212.25	0.3181	0.0001	None significant
HOXC5_1	1592	2581.55	0.6168	0.0001	749	2429.83	0.3085	0.0001	None significant
HOXC6_1	1214	2378.87	0.5105	0.0001	663	2234.4	0.297	0.0001	None significant
HOXC8_1	1361	2539.06	0.5362	0.0001	1008	2382.81	0.4233	0.0001	None significant
HOXC9_1	1691	3873.94	0.4367	0.0001	1464	3603.68	0.4064	0.0001	None significant
HOXD10_1	2250	4245.12	0.5301	0.0001	1512	3972.72	0.3808	0.0001	None significant
HOXD11_1	1413	1886.04	0.7493	0.0015	1104	1762.86	0.6265	0.0001	None significant
HOXD11_2	677	977.931	0.6926	0.0001	562	912.683	0.6162	0.0001	None significant
HOXD11_3	1398	2951.65	0.4738	0.0001	895	2780.74	0.3221	0.0001	None significant
HOXD12_1	1481	1629.02	0.9092	0.153	1198	1528.73	0.7838	0.021	None significant
HOXD12_2	1184	1917.84	0.6176	0.0001	664	1803.75	0.3685	0.0001	None significant
HOXD12_3	925	1087.88	0.8504	0.0632	656	1014.29	0.6471	0.0001	None significant
HOXD13_1	2400	3959.98	0.6062	0.0001	1395	3703.3	0.3769	0.0001	None significant
HOXD13_2	1624	2599.94	0.6248	0.0001	834	2418.44	0.3451	0.0001	None significant
HOXD13_3	1205	1770.09	0.6809	0.0001	1096	1651.87	0.6637	0.0001	None significant
HOXD13_4	1656	2450.97	0.6758	0.0001	760	2300.24	0.3307	0.0001	None significant
HOXD13_5	1319	1990.2	0.6629	0.0001	969	1846.27	0.5251	0.0001	None significant
HOXD1_1	1732	2902.3	0.5969	0.0001	919	2710.06	0.3394	0.0001	None significant
HOXD3_1	1929	3655.08	0.5279	0.0001	1429	3416.45	0.4184	0.0001	None significant
HOXD3_2	1148	1822.39	0.6301	0.0001	684	1696.58	0.4035	0.0001	None significant
HOXD8_1	1349	3417.82	0.3949	0.0001	644	3208.11	0.201	0.0001	None significant
HOXD9_1	1627	2498.73	0.6513	0.0001	1297	2335.16	0.5556	0.0001	None significant
HOXD9_2	1272	2515.88	0.5058	0.0001	655	2359.5	0.2779	0.0001	None significant
HOXD9_3	979	968.288	1.0111	0.4421	625	901.583	0.6936	0.0015	None significant
HSF2_1	2272	1882.24	1.207	0.0001	1852	1736.3	1.0666	0.168	Only upstream significant
HSF2_2	4270	4724	0.9039	0.0255	3298	4380.95	0.7529	0.0001	None significant
HSF4_1	5411	5139.84	1.0527	0.1602	4656	4759.75	0.9782	0.3387	None significant
HSFY2_1	1109	744.697	1.4885	0.0014	720	704.582	1.0219	0.4474	Only upstream significant
HSFY2_2	976	473.777	2.0578	0.0001	788	431.283	1.8252	0.0001	Both significant
HSFY2_3	1236	688.36	1.7944	0.0001	700	631.864	1.1077	0.2407	Only upstream significant
HSF_known1	2845	2258.66	1.2595	0.0001	2530	2075.29	1.219	0.0001	Both significant
HSF_known2	15552	12198.4	1.2749	0.0001	15192	11189.7	1.3576	0.0001	Both significant
HSF_known3	17948	14301.8	1.2549	0.0001	17333	13129	1.3202	0.0001	Both significant
HSF_known4	4685	4468.78	1.0484	0.1801	3882	4104.8	0.9457	0.1804	None significant
HSF_known5	3884	4282.8	0.9069	0.036	3088	3959.74	0.7799	0.0001	None significant
ID4_1	17124	22257	0.7694	0.0001	18698	20387.4	0.9171	0.0001	None significant
IKZF1_1	12548	10418.1	1.2044	0.0001	11885	9562.82	1.2428	0.0001	Both significant
IKZF1_2	15469	14188.5	1.0902	0.0001	15541	12932.1	1.2017	0.0001	Both significant
IKZF2_1	15815	11930.1	1.3256	0.0001	15302	10904.5	1.4032	0.0001	Both significant
IKZF2_2	2657	3330.94	0.7977	0.0001	1764	3090.67	0.5709	0.0001	None significant
IKZF2_3	4386	6133.17	0.7152	0.0001	3140	5749.13	0.5462	0.0001	None significant
IKZF3_1	7308	7671.54	0.9526	0.1305	6455	7070.64	0.9129	0.0195	None significant
INSM1_1	47368	34630.3	1.3678	0.0001	48333	31409.8	1.5388	0.0001	Both significant
IRF4_1	3947	2423.54	1.6283	0.0001	3284	2227.36	1.4742	0.0001	Both significant
IRF4_2	5529	4553.57	1.2142	0.0001	4338	4234.31	1.0245	0.3351	Only upstream significant
IRF6_1	4494	2538.06	1.7703	0.0001	4256	2332.33	1.8244	0.0001	Both significant
IRF_known1	5762	6576.71	0.8761	0.0045	4427	6141.82	0.7208	0.0001	None significant
IRF_known10	8156	8713.28	0.936	0.081	6304	8141.2	0.7744	0.0001	None significant
IRF_known11	8924	7457.96	1.1965	0.0001	7696	6878.38	1.1189	0.0089	Only upstream significant
IRF_known12	4015	2552.16	1.5729	0.0001	3251	2339.9	1.3892	0.0001	Both significant
IRF_known13	3671	3922.1	0.936	0.1435	3194	3652.05	0.8746	0.0135	None significant
IRF_known14	18640	15700.2	1.1872	0.0001	15884	14557.6	1.0911	0.0104	Only upstream significant
IRF_known15	7533	5017.44	1.5013	0.0001	6764	4634.49	1.4594	0.0001	Both significant
IRF_known16	3574	2122.01	1.6839	0.0001	3109	1965.1	1.5818	0.0001	Both significant
IRF_known17	5788	5615.44	1.0307	0.2474	4479	5275.85	0.849	0.0001	None significant
IRF_known18	3335	2892.73	1.1528	0.0284	2358	2718.76	0.8674	0.036	None significant
IRF_known19	5458	5410.44	1.0088	0.4396	4368	5011.13	0.8717	0.006	None significant
IRF_known2	6269	6757.57	0.9277	0.06	6049	6286.1	0.9623	0.2025	None significant
IRF_known20	6068	4969.77	1.2209	0.0001	4687	4632.23	1.0118	0.3987	Only upstream significant
IRF_known21	6174	5356.39	1.1526	0.0001	4447	4993.39	0.8906	0.0195	Only upstream significant
IRF_known3	10208	11931.2	0.8556	0.0001	9027	11078.1	0.8149	0.0001	None significant
IRF_known4	8698	7980.17	1.0899	0.0209	7611	7417.27	1.0261	0.3061	None significant
IRF_known5	5328	7220.37	0.7379	0.0001	4346	6753.03	0.6436	0.0001	None significant
IRF_known6	1801	3124.8	0.5765	0.0001	1319	2907.79	0.4538	0.0001	None significant
IRF_known7	12076	14714.9	0.8207	0.0001	10274	13719.2	0.7489	0.0001	None significant
IRF_known8	7611	10302	0.7388	0.0001	6268	9631.17	0.6508	0.0001	None significant
IRF_known9	6207	7351.1	0.8444	0.0001	5067	6863.29	0.7383	0.0001	None significant
IRX2_1	1033	2803.66	0.3687	0.0001	703	2655.93	0.265	0.0001	None significant
IRX2_2	1402	2734.48	0.5129	0.0001	963	2569.62	0.375	0.0001	None significant
IRX3_1	956	2600.37	0.3679	0.0001	554	2425.57	0.2287	0.0001	None significant
IRX3_2	909	2508.43	0.3626	0.0001	652	2352.51	0.2775	0.0001	None significant
IRX3_3	1108	2749.34	0.4032	0.0001	890	2564.65	0.3473	0.0001	None significant
IRX4_1	976	2889.16	0.338	0.0001	945	2727.25	0.3467	0.0001	None significant
IRX5_1	938	2632.57	0.3565	0.0001	816	2482.74	0.3289	0.0001	None significant
IRX5_2	1271	2747.72	0.4628	0.0001	915	2561	0.3575	0.0001	None significant
IRX6_1	1014	2755.75	0.3682	0.0001	650	2606.26	0.2497	0.0001	None significant
ISL2_1	1562	3498.07	0.4467	0.0001	1284	3266.98	0.3932	0.0001	None significant
ISL2_2	1683	2610.48	0.6448	0.0001	1263	2432.63	0.5194	0.0001	None significant
ISX_1	2476	2037.22	1.2153	0.0089	886	1898.46	0.467	0.0001	None significant
ISX_2	657	1949.73	0.3373	0.0001	481	1848.62	0.2606	0.0001	None significant
ISX_3	1187	1342.48	0.8843	0.0495	447	1254.09	0.3569	0.0001	None significant
ISX_4	895	1045.36	0.8563	0.0465	375	970.456	0.387	0.0001	None significant
ITGB2_1	14713	14557.1	1.0107	0.3073	16092	13240.9	1.2153	0.0001	Only downstream significant
J4118	16289	12222.1	1.3327	0.0001	17746	11087.4	1.6005	0.0001	Both significant
J4123	10159	4766.14	2.1313	0.0001	4805	4329.92	1.1097	0.0029	Both significant
J4128	6444	3179.66	2.0263	0.0001	5440	2884.48	1.8856	0.0001	Both significant
J4133	4899	3624.74	1.3514	0.0001	3699	3358.92	1.1012	0.0449	Only upstream significant
J4138	10819	8273.47	1.3076	0.0001	5058	7595.71	0.6659	0.0001	Only upstream significant
J4143	14475	9354.32	1.5474	0.0001	15507	8495.89	1.8251	0.0001	Both significant
J4148	69277	30250.9	2.29	0.0001	48593	27282.9	1.7811	0.0001	Both significant
J4153	4583	7708.83	0.5946	0.0001	4153	7137.22	0.5819	0.0001	None significant
J4158	8349	10040.9	0.8315	0.0001	7142	9224.23	0.7743	0.0001	None significant
J4163	3103	5298.61	0.5857	0.0001	2833	4904.54	0.5777	0.0001	None significant
J4168	12734	16642.4	0.7652	0.0001	11321	15283.4	0.7408	0.0001	None significant
J4173	50051	30734	1.6285	0.0001	49678	27925.4	1.7789	0.0001	Both significant
J4178	64477	40163.2	1.6054	0.0001	66661	36320.2	1.8353	0.0001	Both significant
J4183	77843	47857.9	1.6265	0.0001	76836	43313.9	1.7739	0.0001	Both significant
J4188	14970	9574.91	1.5634	0.0001	13432	8688.36	1.5459	0.0001	Both significant
J4193	5880	7694.14	0.7642	0.0001	5832	7099.69	0.8215	0.0001	None significant
J4198	14153	15646.5	0.9046	0.0001	14872	14382.6	1.034	0.1724	None significant
J4203	19883	18841.7	1.0553	0.0374	19014	17212.5	1.1047	0.0001	Only downstream significant
J4208	8789	5996.45	1.4656	0.0001	6071	5450.77	1.1138	0.0001	Both significant
J4213	16935	11204.6	1.5114	0.0001	12994	10197.5	1.2742	0.0001	Both significant
J4218	19204	6517.8	2.9461	0.0001	7207	5880.33	1.2256	0.0001	Both significant
J4223	946	1041.55	0.9083	0.174	744	963.988	0.772	0.009	None significant
J4228	1007	1867.24	0.5395	0.0001	553	1760.89	0.3144	0.0001	None significant
JDP2_1	10105	5612.36	1.8003	0.0001	3473	5139.55	0.6758	0.0001	Only upstream significant
JDP2_2	1912	7024.96	0.2723	0.0001	1046	6554.97	0.1597	0.0001	None significant
JDP2_3	6289	3700.35	1.6994	0.0001	1713	3406.52	0.503	0.0001	Only upstream significant
JDP2_4	2059	7991.61	0.2577	0.0001	1172	7449.96	0.1574	0.0001	None significant
JDP2_5	6533	3865.98	1.6897	0.0001	1905	3531.37	0.5396	0.0001	Only upstream significant
JDP2_6	1901	7861.46	0.2419	0.0001	1128	7326.3	0.1541	0.0001	None significant
JDP2_7	6301	3922.4	1.6063	0.0001	1857	3586.8	0.5179	0.0001	Only upstream significant
KLF12_1	13435	10332.8	1.3002	0.0001	13718	9399.34	1.4594	0.0001	Both significant
KLF12_2	103981	47172.4	2.2043	0.0001	55085	42258.2	1.3035	0.0001	Both significant
KLF13_1	64325	28427.6	2.2627	0.0001	31324	25465.9	1.23	0.0001	Both significant
KLF14_1	142478	58522.5	2.4346	0.0001	78816	52378.6	1.5047	0.0001	Both significant
LBX2_1	1889	2314.59	0.8162	0.0045	694	2172.41	0.3198	0.0001	None significant
LBX2_2	2659	3117.26	0.853	0.0045	2120	2891.12	0.7334	0.0001	None significant
LBX2_3	1534	1873.78	0.8188	0.006	679	1747.27	0.389	0.0001	None significant
LHX1_1	1162	2571.98	0.452	0.0001	763	2409.55	0.3169	0.0001	None significant
LHX2_1	2027	2641.09	0.7676	0.0015	902	2454.76	0.3677	0.0001	None significant
LHX2_2	923	1569.26	0.5884	0.0001	528	1461.43	0.3617	0.0001	None significant
LHX2_3	953	2105.16	0.453	0.0001	623	1975.82	0.3157	0.0001	None significant
LHX3_1	726	1605.77	0.4525	0.0001	365	1501.12	0.2437	0.0001	None significant
LHX3_2	1032	2473.12	0.4175	0.0001	606	2328.87	0.2605	0.0001	None significant
LHX3_3	1154	2493.21	0.4631	0.0001	595	2352.88	0.2532	0.0001	None significant
LHX4_1	2766	3198.91	0.8647	0.0242	1280	2983.55	0.4292	0.0001	None significant
LHX4_2	503	980.164	0.5137	0.0001	275	919.506	0.2998	0.0001	None significant
LHX5_1	1008	2484.14	0.406	0.0001	684	2314.8	0.2958	0.0001	None significant
LHX6_1	2109	2496.13	0.845	0.0165	935	2326.11	0.4022	0.0001	None significant
LHX6_2	5232	3222.82	1.6232	0.0001	1420	2984.72	0.4759	0.0001	Only upstream significant
LHX6_3	488	1064.34	0.459	0.0001	316	994.838	0.3183	0.0001	None significant
LHX6_4	972	2232.6	0.4356	0.0001	531	2106.79	0.2524	0.0001	None significant
LHX6_5	1104	1944.94	0.5678	0.0001	716	1813.49	0.3952	0.0001	None significant
LHX8_1	8199	4563.2	1.7966	0.0001	2715	4176.31	0.6502	0.0001	Only upstream significant
LHX8_2	1341	2039.49	0.6577	0.0001	658	1890.83	0.3483	0.0001	None significant
LHX8_3	775	999.187	0.7759	0.006	283	935.528	0.3032	0.0001	None significant
LHX8_4	564	1466.01	0.3851	0.0001	384	1369.53	0.2809	0.0001	None significant
LHX9_1	1417	2578.95	0.5496	0.0001	924	2425.35	0.3812	0.0001	None significant
LHX9_2	1093	1429.37	0.7648	0.0001	502	1340.38	0.375	0.0001	None significant
LHX9_3	940	2294.81	0.4099	0.0001	478	2160.76	0.2216	0.0001	None significant
LMO2_1	28274	34113.2	0.8288	0.0001	29565	31174.7	0.9484	0.0045	None significant
LMO2_2	2481	2234.96	1.11	0.0254	1920	2055.35	0.9342	0.1608	None significant
LMX1A_1	1267	2590.28	0.4893	0.0001	909	2428.75	0.3745	0.0001	None significant
LMX1A_2	503	981.094	0.5132	0.0001	275	926.53	0.2976	0.0001	None significant
LMX1B_1	1072	2340.03	0.4583	0.0001	666	2186.91	0.3049	0.0001	None significant
LMX1B_2	628	1078.45	0.5827	0.0001	307	1008.85	0.305	0.0001	None significant
LMX1B_3	725	1136.65	0.6382	0.0001	424	1061.75	0.3999	0.0001	None significant
MA0007.2	9805	14607.3	0.6713	0.0001	9342	13497.2	0.6922	0.0001	None significant
MA0014.2	92003	57095	1.6114	0.0001	83447	51787	1.6113	0.0001	Both significant
MA0024.2	103596	47482.8	2.1817	0.0001	86793	42864.5	2.0248	0.0001	Both significant
MA0035.3	2542	4328.83	0.5873	0.0001	1839	4034.11	0.456	0.0001	None significant
MA0036.2	2680	4954.71	0.541	0.0001	2264	4630.52	0.489	0.0001	None significant
MA0037.2	994	1776.78	0.5597	0.0001	747	1662.23	0.4497	0.0001	None significant
MA0050.2	19660	23786.7	0.8265	0.0001	15123	22199.9	0.6812	0.0001	None significant
MA0052.2	2822	5757.61	0.4902	0.0001	2016	5416.64	0.3723	0.0001	None significant
MA0058.2	5646	8134.31	0.6941	0.0001	3612	7517.1	0.4806	0.0001	None significant
MA0060.2	35971	15700.2	2.291	0.0001	11074	14247.7	0.7773	0.0001	Only upstream significant
MA0076.2	36700	17000.7	2.1587	0.0001	20418	15417.9	1.3243	0.0001	Both significant
MA0080.3	43209	36536.7	1.1826	0.0001	37951	33538.2	1.1316	0.0001	Both significant
MA0083.2	6237	7443.38	0.8379	0.0001	4435	6919.91	0.641	0.0001	None significant
MA0093.2	11691	10582.3	1.1048	0.0001	6782	9713.17	0.6983	0.0001	Only upstream significant
MA0095.2	12600	10150.6	1.2413	0.0001	13360	9287.54	1.4384	0.0001	Both significant
MA0098.2	56435	43408	1.3001	0.0001	43902	39706.7	1.1057	0.0001	Both significant
MA0100.2	5540	8509.42	0.6511	0.0001	4767	7858.08	0.6067	0.0001	None significant
MA0102.3	2168	3540	0.6125	0.0001	1178	3311.78	0.3559	0.0001	None significant
MA0103.2	11064	13502.3	0.8194	0.0001	14856	12386.9	1.1993	0.0001	Only downstream significant
MA0104.3	6293	5869.19	1.0722	0.0254	3797	5361.05	0.7083	0.0001	None significant
MA0105.3	16024	13773.6	1.1634	0.0001	16045	12554.1	1.278	0.0001	Both significant
MA0106.2	9027	11099.3	0.8133	0.0001	7452	10228.9	0.7285	0.0001	None significant
MA0113.2	8194	11812.4	0.6937	0.0001	7886	10917.6	0.7223	0.0001	None significant
MA0114.2	23210	25118.6	0.924	0.0001	23582	23042.3	1.0234	0.1728	None significant
MA0137.3	8858	8570.97	1.0335	0.1676	5981	7902.46	0.7569	0.0001	None significant
MA0140.2	5216	7837.78	0.6655	0.0001	3892	7296.38	0.5335	0.0001	None significant
MA0141.2	11714	13872.3	0.8444	0.0001	12713	12754.8	0.9967	0.4547	None significant
MA0143.3	3175	4537.16	0.6998	0.0001	3072	4212.93	0.7292	0.0001	None significant
MA0144.2	11245	11590.9	0.9702	0.147	7891	10687.2	0.7384	0.0001	None significant
MA0145.2	51053	40885.9	1.2487	0.0001	52322	37211.5	1.4061	0.0001	Both significant
MA0147.2	7161	8692.26	0.8239	0.0001	5006	7987.35	0.6268	0.0001	None significant
MA0148.3	4135	11389.9	0.3631	0.0001	2777	10635.4	0.2612	0.0001	None significant
MA0150.2	10517	19586.8	0.537	0.0001	8993	18184	0.4946	0.0001	None significant
MA0154.2	31802	32331.7	0.9836	0.1668	35096	29414.3	1.1932	0.0001	Only downstream significant
MA0258.2	29417	29395.3	1.0007	0.5031	34159	26819.4	1.2737	0.0001	Only downstream significant
MA0461.1	10462	15252.1	0.686	0.0001	10718	14026.7	0.7641	0.0001	None significant
MA0462.1	3668	12467.5	0.2943	0.0001	2402	11628.7	0.2066	0.0001	None significant
MA0463.1	12622	14286.5	0.8835	0.0001	10724	13248.6	0.8095	0.0001	None significant
MA0464.1	11984	11779.6	1.0174	0.2815	8460	10771.1	0.7855	0.0001	None significant
MA0465.1	1588	3399.76	0.4672	0.0001	1128	3191.63	0.3536	0.0001	None significant
MA0466.1	2200	3320.59	0.6626	0.0001	1152	3107.01	0.371	0.0001	None significant
MA0468.1	1407	2653.05	0.5305	0.0001	794	2480.26	0.3204	0.0001	None significant
MA0470.1	107611	49585.7	2.1702	0.0001	91949	44725.3	2.0558	0.0001	Both significant
MA0471.1	88356	49029.2	1.8021	0.0001	76106	44381.8	1.7148	0.0001	Both significant
MA0473.1	38693	26014.4	1.4874	0.0001	24748	23737.5	1.0426	0.0284	Only upstream significant
MA0474.1	30023	26432.9	1.1358	0.0001	23520	24309.3	0.9675	0.0554	Only upstream significant
MA0475.1	34310	23562.5	1.4561	0.0001	21417	21544.7	0.9941	0.4029	Only upstream significant
MA0476.1	4139	14181.3	0.2919	0.0001	2775	13216.3	0.21	0.0001	None significant
MA0477.1	7158	16760.2	0.4271	0.0001	5900	15482.2	0.3811	0.0001	None significant
MA0478.1	7220	17306.9	0.4172	0.0001	5545	16030.6	0.3459	0.0001	None significant
MA0479.1	2796	4648.06	0.6016	0.0001	2773	4311.13	0.6433	0.0001	None significant
MA0480.1	5013	8231.47	0.6091	0.0001	4090	7633.92	0.5358	0.0001	None significant
MA0481.1	8710	13356.5	0.6521	0.0001	6042	12431.8	0.4861	0.0001	None significant
MA0482.1	2535	4373.63	0.5797	0.0001	2101	4057.26	0.518	0.0001	None significant
MA0483.1	6422	8664.95	0.7412	0.0001	4154	8047.32	0.5163	0.0001	None significant
MA0484.1	21856	23091.9	0.9465	0.0135	20945	21205.6	0.9877	0.3129	None significant
MA0485.1	2142	3591.44	0.5965	0.0001	1509	3370.62	0.4479	0.0001	None significant
MA0486.1	13788	13189.7	1.0454	0.0968	11750	12173.2	0.9652	0.1545	None significant
MA0488.1	7269	8214.75	0.8849	0.0001	2956	7608.47	0.3886	0.0001	None significant
MA0490.1	5418	16252.7	0.3334	0.0001	3952	15101.8	0.2617	0.0001	None significant
MA0491.1	4187	13957	0.3	0.0001	2807	12952	0.2168	0.0001	None significant
MA0492.1	5418	16247.6	0.3335	0.0001	3952	15079.3	0.2621	0.0001	None significant
MA0493.1	82590	43331	1.906	0.0001	47311	38987	1.2135	0.0001	Both significant
MA0494.1	20097	22050.1	0.9114	0.0015	21102	20203.6	1.0445	0.0675	None significant
MA0495.1	6325	15298	0.4135	0.0001	5643	14251.8	0.396	0.0001	None significant
MA0496.1	4506	11811.3	0.3816	0.0001	3827	11007.5	0.3477	0.0001	None significant
MA0497.1	3284	6720.75	0.4887	0.0001	2595	6288.8	0.4127	0.0001	None significant
MA0498.1	18955	24027.3	0.7889	0.0001	18456	22120.4	0.8344	0.0001	None significant
MA0500.1	23327	29053	0.8029	0.0001	24861	26591	0.9349	0.0001	None significant
MA0501.1	6394	16130	0.3964	0.0001	4989	15059.4	0.3313	0.0001	None significant
MA0502.1	30304	11559.8	2.6213	0.0001	6425	10478.9	0.6132	0.0001	Only upstream significant
MA0503.1	82590	43348.5	1.9052	0.0001	47311	39000	1.2131	0.0001	Both significant
MA0504.1	77363	50768.9	1.5238	0.0001	74436	46050.3	1.6164	0.0001	Both significant
MA0505.1	19243	22881.5	0.841	0.0001	21593	20917.6	1.0323	0.1036	None significant
MA0506.1	106233	45384.5	2.3407	0.0001	76356	40977.6	1.8633	0.0001	Both significant
MA0507.1	3291	4750.84	0.6928	0.0001	1241	4452.6	0.2789	0.0001	None significant
MA0508.1	17439	21152.1	0.8245	0.0001	17171	19618.2	0.8753	0.0001	None significant
MA0509.1	21402	17925.2	1.194	0.0001	15595	16448.8	0.9481	0.0255	Only upstream significant
MA0510.1	40175	37006.3	1.0856	0.0001	39768	33738.2	1.1787	0.0001	Both significant
MA0511.1	18481	22249	0.8307	0.0001	18465	20442.5	0.9033	0.0001	None significant
MA0512.1	13569	18237.6	0.744	0.0001	13221	16752.4	0.7892	0.0001	None significant
MA0513.1	20875	25213.5	0.8279	0.0001	20789	23138.6	0.8985	0.0001	None significant
MA0514.1	8147	10164.5	0.8015	0.0001	8009	9429.77	0.8493	0.0001	None significant
MA0515.1	4281	6519.77	0.6567	0.0001	3934	6037.71	0.6516	0.0001	None significant
MA0517.1	11886	13263.6	0.8961	0.0001	10190	12352.2	0.825	0.0001	None significant
MA0518.1	13674	13588.8	1.0063	0.4131	10211	12533.9	0.8147	0.0001	None significant
MA0519.1	9539	9546.72	0.9992	0.5063	7086	8818.16	0.8036	0.0001	None significant
MA0520.1	7234	9121.98	0.7931	0.0001	6219	8479.76	0.7334	0.0001	None significant
MA0521.1	21064	27106.1	0.7771	0.0001	21824	24835.6	0.8787	0.0001	None significant
MA0522.1	27615	34794.4	0.7937	0.0001	28682	31962	0.8974	0.0001	None significant
MA0523.1	4870	7867.01	0.6191	0.0001	4305	7362.25	0.5848	0.0001	None significant
MA0525.1	45128	38026	1.1868	0.0001	39333	34686.3	1.134	0.0001	Both significant
MA0526.1	11752	12284.5	0.9567	0.0733	7481	11295.3	0.6623	0.0001	None significant
MA0527.1	45009	19384.2	2.3219	0.0001	38817	17553.9	2.2112	0.0001	Both significant
MA0591.1	17291	25697.3	0.6729	0.0001	15591	23660.8	0.659	0.0001	None significant
MA0592.1	10911	13385.6	0.8151	0.0001	12077	12263.9	0.9848	0.3006	None significant
MA0593.1	3856	6847.2	0.5632	0.0001	2552	6393.56	0.3992	0.0001	None significant
MA0594.1	1709	3249.02	0.5262	0.0001	1166	3046.59	0.3829	0.0001	None significant
MA0595.1	11248	11340.5	0.9918	0.3909	11465	10396	1.1028	0.0001	Only downstream significant
MA0596.1	5939	7931.5	0.7488	0.0001	5488	7312.26	0.7506	0.0001	None significant
MA0597.1	30697	21777.1	1.4096	0.0001	28752	19798.5	1.4522	0.0001	Both significant
MA0598.1	14360	15608	0.92	0.0001	13825	14361.9	0.9626	0.0569	None significant
MA0600.1	39399	30727.9	1.2822	0.0001	30805	28106.6	1.096	0.0001	Both significant
MAFF_1	7820	11260.8	0.6945	0.0001	6900	10403.3	0.6633	0.0001	None significant
MAFG_1	6957	10623.7	0.6549	0.0001	5573	9865.1	0.565	0.0001	None significant
MAF_known1	27810	24959.1	1.1142	0.0001	26467	22832	1.1592	0.0001	Both significant
MAF_known10	4424	7936.08	0.5575	0.0001	3531	7402.26	0.4771	0.0001	None significant
MAF_known11	11430	13225.6	0.8642	0.0015	10290	12171.3	0.8454	0.0001	None significant
MAF_known12	9771	9703.47	1.007	0.4213	7744	8922.84	0.8679	0.0015	None significant
MAF_known2	13461	19270.7	0.6985	0.0001	10656	17747.2	0.6005	0.0001	None significant
MAF_known3	10139	9387.65	1.08	0.0074	8323	8614.2	0.9662	0.129	None significant
MAF_known4	5027	9950.07	0.5053	0.0001	4287	9279.22	0.4621	0.0001	None significant
MAF_known5	3479	7277.77	0.4781	0.0001	2420	6837.66	0.354	0.0001	None significant
MAF_known6	4369	8692.86	0.5027	0.0001	4043	8096.6	0.4994	0.0001	None significant
MAF_known7	9152	12584.5	0.7273	0.0001	8354	11613.6	0.7194	0.0001	None significant
MAF_known8	3904	7325.99	0.533	0.0001	3550	6823.89	0.5203	0.0001	None significant
MAF_known9	11516	13026.9	0.884	0.0001	10852	12046.6	0.9008	0.0003	None significant
MEF2B_1	1595	3078.47	0.5183	0.0001	771	2883.72	0.2676	0.0001	None significant
MEF2D_1	1619	3257.83	0.4971	0.0001	816	3046.93	0.2681	0.0001	None significant
MEF2_known1	3158	5409.43	0.5839	0.0001	2313	5063.43	0.4569	0.0001	None significant
MEF2_known10	2192	4021.32	0.5452	0.0001	1534	3763.19	0.4078	0.0001	None significant
MEF2_known12	1678	3596.93	0.4667	0.0001	805	3372.14	0.2389	0.0001	None significant
MEF2_known2	1741	4193.75	0.4153	0.0001	1018	3931.36	0.2591	0.0001	None significant
MEF2_known3	3526	7125.07	0.4949	0.0001	2526	6665.28	0.3791	0.0001	None significant
MEF2_known4	3356	6533.73	0.5137	0.0001	2035	6101.36	0.3336	0.0001	None significant
MEF2_known5	2723	7321.02	0.372	0.0001	2624	6890.92	0.3809	0.0001	None significant
MEF2_known6	3290	5370.21	0.6127	0.0001	2323	5046.92	0.4604	0.0001	None significant
MEF2_known7	3212	4403.17	0.7295	0.0001	1995	4124.31	0.4838	0.0001	None significant
MEF2_known8	2492	4791.94	0.5201	0.0001	1958	4486.83	0.4365	0.0001	None significant
MEF2_known9	2025	4675.92	0.4332	0.0001	1217	4374.27	0.2784	0.0001	None significant
MEIS1_1	9239	12295	0.7515	0.0001	8642	11312.3	0.764	0.0001	None significant
MEIS1_2	5437	9111.52	0.5968	0.0001	5165	8469.15	0.6099	0.0001	None significant
MEIS1_3	5656	9189.66	0.6155	0.0001	5400	8526.44	0.6334	0.0001	None significant
MEIS1_4	2601	3861.68	0.6736	0.0001	2799	3566.44	0.7849	0.0001	None significant
MEIS1__HOXA9_1	3350	4995.02	0.6707	0.0001	2428	4660.3	0.5211	0.0001	None significant
MEIS1__HOXA9_2	2609	4709.14	0.5541	0.0001	2311	4421.9	0.5227	0.0001	None significant
MEIS2_1	3681	6643.58	0.5541	0.0001	3459	6173.46	0.5604	0.0001	None significant
MEIS2_2	5683	7946.81	0.7152	0.0001	5593	7315.7	0.7646	0.0001	None significant
MEIS2_3	1457	2033.96	0.7165	0.0001	1139	1886.42	0.604	0.0001	None significant
MEIS3_1	6248	9666.15	0.6464	0.0001	5851	8966.61	0.6526	0.0001	None significant
MEIS3_2	3930	5457.42	0.7202	0.0001	3538	5036.61	0.7025	0.0001	None significant
MEIS3_3	5954	9742.3	0.6112	0.0001	6149	8998.51	0.6834	0.0001	None significant
MEIS3_4	1457	2019.64	0.7216	0.0001	1139	1881.32	0.6056	0.0001	None significant
MEIS3_5	5152	9015.87	0.5715	0.0001	5230	8336.09	0.6274	0.0001	None significant
MEOX1_1	2477	3570.67	0.6938	0.0001	1752	3347.8	0.5235	0.0001	None significant
MEOX1_2	785	1712.21	0.4588	0.0001	730	1604.22	0.4554	0.0001	None significant
MEOX2_1	820	1713.83	0.4788	0.0001	509	1596.37	0.3193	0.0001	None significant
MEOX2_2	788	2063.6	0.3822	0.0001	552	1932.02	0.2861	0.0001	None significant
MEOX2_3	1058	3272.21	0.3235	0.0001	960	3053.1	0.3147	0.0001	None significant
MEOX2_4	405	956.211	0.4241	0.0001	350	885.736	0.3958	0.0001	None significant
MESP1_1	22032	21385.5	1.0302	0.0644	21571	19549.5	1.1034	0.0001	Only downstream significant
MGA_1	3146	3832.18	0.821	0.0001	2722	3516.03	0.7742	0.0001	None significant
MGA_2	5056	5006.09	1.01	0.4302	4270	4603.77	0.9275	0.1142	None significant
MGA_3	6468	5600.04	1.155	0.0044	5413	5156.91	1.0496	0.1969	Only upstream significant
MIXL1_1	1421	1770.37	0.8028	0.003	661	1642.71	0.4027	0.0001	None significant
MLXIPL_1	5647	3027.24	1.8651	0.0001	2115	2754.25	0.768	0.0001	Only upstream significant
MLX_1	5641	2735.43	2.0618	0.0001	1951	2489.15	0.7839	0.0001	Only upstream significant
MLX_2	5441	2815.51	1.9322	0.0001	2000	2560.27	0.7813	0.0001	Only upstream significant
MNT_1	6821	4332.4	1.5743	0.0001	3541	3934.57	0.9	0.0211	Only upstream significant
MNX1_1	1757	2513.41	0.6992	0.0001	958	2337.4	0.4101	0.0001	None significant
MNX1_2	1220	2094.69	0.5826	0.0001	516	1960.46	0.2636	0.0001	None significant
MSC_1	6377	10467	0.6093	0.0001	6315	9659.97	0.6538	0.0001	None significant
MSX1_1	1641	1747.91	0.9389	0.1872	1340	1633.41	0.8205	0.003	None significant
MSX1_2	1175	2545.56	0.4618	0.0001	671	2381.66	0.282	0.0001	None significant
MSX1_3	1387	3336.32	0.4159	0.0001	740	3144.25	0.2356	0.0001	None significant
MSX1_4	1322	1744.42	0.758	0.0001	565	1622.82	0.3486	0.0001	None significant
MSX1_5	1329	1526.5	0.8707	0.0375	525	1430.44	0.3675	0.0001	None significant
MSX2_1	2630	3390.6	0.7757	0.0001	1135	3131.72	0.3626	0.0001	None significant
MSX2_2	1808	3301.45	0.5478	0.0001	983	3097.41	0.3176	0.0001	None significant
MSX2_3	1503	3486.85	0.4312	0.0001	766	3278.94	0.2338	0.0001	None significant
MSX2_4	1329	1538.41	0.864	0.0225	525	1427.55	0.3682	0.0001	None significant
MSX2_6	1329	1528.8	0.8694	0.03	525	1425.45	0.3687	0.0001	None significant
MTF1_1	71987	44319.3	1.6243	0.0001	61199	40117.8	1.5255	0.0001	Both significant
MTF1_2	22849	13710.7	1.6665	0.0001	17038	12478.6	1.3653	0.0001	Both significant
MTF1_3	15907	11649	1.3655	0.0001	13107	10612.8	1.235	0.0001	Both significant
MXI1_known1	20568	19037.8	1.0804	0.0001	17037	17333.7	0.9829	0.232	Only upstream significant
MYBL1_1	2680	1350.76	1.9833	0.0001	1743	1223.53	1.4242	0.0001	Both significant
MYBL1_2	2129	1377.06	1.5456	0.0001	1613	1271.08	1.2688	0.0059	Only upstream significant
MYBL1_3	1452	965.353	1.5036	0.0001	1231	887.368	1.3868	0.0001	Both significant
MYBL1_4	1506	807.514	1.8639	0.0001	966	728.087	1.3263	0.0089	Only upstream significant
MYBL1_5	5631	3175.36	1.7731	0.0001	5152	2888.49	1.7834	0.0001	Both significant
MYBL2_1	1976	1342.32	1.4717	0.0001	1801	1225.26	1.4695	0.0001	Both significant
MYBL2_2	3245	2141.27	1.5152	0.0001	2775	1952.1	1.4213	0.0001	Both significant
MYBL2_3	1759	894.301	1.9658	0.0001	1213	817.283	1.4836	0.0001	Both significant
MYBL2_4	2403	1504.18	1.5972	0.0001	1857	1391.69	1.3341	0.0001	Both significant
MYB_1	39120	23120.5	1.692	0.0001	37475	20942.1	1.7894	0.0001	Both significant
MYB_2	8536	6759.49	1.2628	0.0001	7803	6190.86	1.2604	0.0001	Both significant
MYB_3	9772	7518.35	1.2997	0.0001	8488	6911.53	1.2281	0.0001	Both significant
MYB_4	6837	5024.24	1.3607	0.0001	5942	4591.81	1.294	0.0001	Both significant
MYB_5	5537	3676.64	1.5059	0.0001	4728	3370.43	1.4027	0.0001	Both significant
MYB_6	2780	1396.91	1.9894	0.0001	1678	1275.98	1.3148	0.0059	Only upstream significant
MYCN_1	14849	8596.67	1.7272	0.0001	10534	7793.83	1.3515	0.0001	Both significant
MYCN_2	24299	13052.5	1.8616	0.0001	16279	11818.1	1.3774	0.0001	Both significant
MYC_known1	9368	6619.19	1.4152	0.0001	6015	6021.44	0.9989	0.4747	Only upstream significant
MYC_known11	26298	20844.3	1.2616	0.0001	23363	18988.4	1.2304	0.0001	Both significant
MYC_known12	4490	2937.19	1.5285	0.0001	2406	2663.07	0.9035	0.0339	Only upstream significant
MYC_known13	8946	7426.27	1.2046	0.0001	7181	6790.62	1.0575	0.0735	Only upstream significant
MYC_known14	16736	13111.3	1.2764	0.0001	13134	11898.1	1.1039	0.0001	Both significant
MYC_known15	9440	6051.26	1.5599	0.0001	5346	5504.05	0.9713	0.2483	Only upstream significant
MYC_known16	9703	7581.63	1.2798	0.0001	6590	6917.5	0.9527	0.1215	Only upstream significant
MYC_known17	5398	2865.15	1.8837	0.0001	2277	2594.06	0.8778	0.0045	Only upstream significant
MYC_known18	18912	10900.7	1.7349	0.0001	13180	9911	1.3298	0.0001	Both significant
MYC_known19	22633	15352.9	1.4742	0.0001	15858	13941.8	1.1374	0.0001	Both significant
MYC_known2	8908	4829.69	1.8443	0.0001	3775	4383.1	0.8613	0.0075	Only upstream significant
MYC_known20	16839	11218.2	1.501	0.0001	12707	10254.3	1.2392	0.0001	Both significant
MYC_known21	6681	4293.2	1.5561	0.0001	3478	3884.07	0.8955	0.012	Only upstream significant
MYC_known22	6433	4619.1	1.3926	0.0001	2506	4244.34	0.5905	0.0001	Only upstream significant
MYC_known3	11639	6913.36	1.6835	0.0001	6044	6256.37	0.9661	0.2396	Only upstream significant
MYC_known4	9054	7403.95	1.2228	0.0001	4162	6778.01	0.6141	0.0001	Only upstream significant
MYC_known5	7405	6883.61	1.0757	0.0314	4162	6339.73	0.6565	0.0001	None significant
MYC_known6	16813	11726	1.4338	0.0001	12223	10663.7	1.1462	0.0001	Both significant
MYC_known7	7925	5248.41	1.5099	0.0001	4459	4759.12	0.937	0.048	Only upstream significant
MYC_known8	43175	18649.4	2.315	0.0001	27301	16835.8	1.6216	0.0001	Both significant
MYC_known9	15150	8370.88	1.8097	0.0001	7127	7617.95	0.9356	0.1095	Only upstream significant
MYF6_1	26704	31177.9	0.8565	0.0001	26398	28524	0.9255	0.0001	None significant
MYF6_2	2917	4876.96	0.5982	0.0001	2325	4547	0.5114	0.0001	None significant
MYF_1	31284	38110.1	0.8209	0.0001	35708	34972.5	1.021	0.144	None significant
MYOD1_1	17716	20400	0.8684	0.0001	16925	18764.5	0.902	0.0001	None significant
MYOD1_2	15965	22362.7	0.7139	0.0001	16147	20511.7	0.7872	0.0001	None significant
MYOD1_3	92907	81847.2	1.1351	0.0001	93216	74582.8	1.2498	0.0001	Both significant
MYOG_1	14198	19431.9	0.7307	0.0001	15012	17813.6	0.8427	0.0001	None significant
MZF1_1	34025	22801.8	1.4922	0.0001	33373	20693.9	1.6127	0.0001	Both significant
MZF1_2	67599	44876.2	1.5063	0.0001	64138	40583.7	1.5804	0.0001	Both significant
MZF1_4	40197	24482.3	1.6419	0.0001	33678	22185.4	1.518	0.0001	Both significant
NANOG_known1	10357	10325.9	1.003	0.4562	8982	9465.03	0.949	0.0585	None significant
NEUROD2_1	943	2587.77	0.3647	0.0001	1144	2411.27	0.4747	0.0001	None significant
NEUROG2_1	751	2329.41	0.3227	0.0001	711	2180.92	0.3263	0.0001	None significant
NEUROG2_2	1591	4278.28	0.372	0.0001	1455	3986.07	0.3652	0.0001	None significant
NFAT5_1	4908	6752.78	0.7269	0.0001	3797	6303.23	0.6025	0.0001	None significant
NFATC1_1	8466	8697.54	0.9734	0.3038	5905	8110.2	0.7281	0.0001	None significant
NFATC1_2	3725	3981.69	0.9355	0.1425	3324	3695.17	0.8996	0.0516	None significant
NFATC1_3	3156	4329.13	0.7291	0.0001	2351	4040.27	0.582	0.0001	None significant
NFATC2_1	3204	4746.91	0.675	0.0001	2673	4430.04	0.6035	0.0001	None significant
NFAT_1	7454	9204.55	0.8098	0.0001	6352	8596.59	0.7389	0.0001	None significant
NFAT_2	5747	6887.95	0.8344	0.0001	4961	6399.88	0.7752	0.0001	None significant
NFE2L1_1	5272	7426.66	0.7099	0.0001	4769	6852.08	0.696	0.0001	None significant
NFE2L1__MAFG_1	8124	15720.6	0.5168	0.0001	6048	14596	0.4144	0.0001	None significant
NFE2L2_1	27948	16145.3	1.731	0.0001	17498	14748.7	1.1864	0.0001	Both significant
NFE2L2_2	7932	14835.5	0.5347	0.0001	6202	13788.5	0.4498	0.0001	None significant
NFE2L2_3	6399	10609.1	0.6032	0.0001	5113	9840.53	0.5196	0.0001	None significant
NFE2_known1	7587	13695.7	0.554	0.0001	5870	12712	0.4618	0.0001	None significant
NFE2_known2	2817	8921.43	0.3158	0.0001	1859	8277.25	0.2247	0.0001	None significant
NFIA_1	13506	16939.2	0.7973	0.0001	11362	15551.2	0.7306	0.0001	None significant
NFIB_1	13771	17461.4	0.7887	0.0001	11625	15990.3	0.727	0.0001	None significant
NFIC_1	62301	50408.6	1.2359	0.0001	56088	46202.4	1.214	0.0001	Both significant
NFIC_2	47299	40419	1.1702	0.0001	41152	36861.4	1.1164	0.0001	Both significant
NFIC_3	30303	27936.6	1.0847	0.0001	25243	25564.9	0.9874	0.3175	Only upstream significant
NFIL3_1	1398	1643.58	0.8507	0.0382	590	1530.1	0.386	0.0001	None significant
NFIL3_2	1275	1726.38	0.7387	0.0001	610	1625.56	0.3756	0.0001	None significant
NFIL3_3	3221	2483.13	1.297	0.0001	1004	2291.94	0.4383	0.0001	Only upstream significant
NFIX_1	22698	23584.7	0.9624	0.0555	19950	21557.7	0.9254	0.0045	None significant
NFKB_known1	27786	19624.3	1.4159	0.0001	31502	17752.8	1.7744	0.0001	Both significant
NFKB_known10	14750	11508.6	1.2816	0.0001	16916	10447.1	1.6191	0.0001	Both significant
NFKB_known11	18672	13818	1.3513	0.0001	20462	12526.5	1.6335	0.0001	Both significant
NFKB_known2	11626	8935.87	1.301	0.0001	10762	8144.41	1.3214	0.0001	Both significant
NFKB_known3	16872	13400.8	1.259	0.0001	17515	12198.7	1.4358	0.0001	Both significant
NFKB_known4	16208	14211.2	1.1405	0.0001	15695	12990.8	1.2081	0.0001	Both significant
NFKB_known5	16592	14063.3	1.1798	0.0001	16883	12859.3	1.3129	0.0001	Both significant
NFKB_known6	38403	29520.5	1.3009	0.0001	39901	26899.2	1.4833	0.0001	Both significant
NFKB_known7	17705	13822.5	1.2809	0.0001	18253	12572.4	1.4518	0.0001	Both significant
NFKB_known9	11334	9176.48	1.2351	0.0001	9726	8401.71	1.1576	0.0001	Both significant
NFY_known1	17743	6748.9	2.6288	0.0001	3187	6147.7	0.5185	0.0001	Only upstream significant
NFY_known2	12991	7373.64	1.7617	0.0001	3112	6761.14	0.4604	0.0001	Only upstream significant
NFY_known3	37686	11661.6	3.2315	0.0001	6145	10518.5	0.5842	0.0001	Only upstream significant
NFY_known4	11322	6974.64	1.6232	0.0001	3575	6381.82	0.5603	0.0001	Only upstream significant
NFY_known5	25286	9259.89	2.7305	0.0001	5847	8398.49	0.6962	0.0001	Only upstream significant
NFY_known6	37614	11627.3	3.2348	0.0001	6396	10489.6	0.6098	0.0001	Only upstream significant
NHLH1_1	100686	83272.6	1.2091	0.0001	108391	75718.7	1.4315	0.0001	Both significant
NHLH1_2	77554	68501.2	1.1322	0.0001	86940	62321.7	1.395	0.0001	Both significant
NHLH1_3	33036	28567.3	1.1564	0.0001	33489	26128.6	1.2817	0.0001	Both significant
NHLH1_4	35514	28679.8	1.2383	0.0001	34696	26167.4	1.3259	0.0001	Both significant
NHLH1_5	19502	20253.5	0.9629	0.054	20170	18489.2	1.0909	0.0001	Only downstream significant
NKX1-1_1	9096	5117.42	1.7773	0.0001	3335	4684.2	0.712	0.0001	Only upstream significant
NKX1-2_1	2245	2841.74	0.7901	0.006	736	2662.98	0.2767	0.0001	None significant
NKX2-1_1	2126	3603.56	0.5901	0.0001	1746	3358.99	0.5199	0.0001	None significant
NKX2-1_2	22840	19636.8	1.1631	0.0001	21777	17963.3	1.2123	0.0001	Both significant
NKX2-1_3	5830	8108.84	0.719	0.0001	5162	7554.5	0.6833	0.0001	None significant
NKX2-2_1	1385	2728	0.5079	0.0001	1209	2561.41	0.4722	0.0001	None significant
NKX2-2_2	5216	7458.96	0.6993	0.0001	4953	6893.91	0.7185	0.0001	None significant
NKX2-3_1	2972	4524.4	0.657	0.0001	3030	4223.72	0.7174	0.0001	None significant
NKX2-3_2	3376	5087.4	0.6637	0.0001	3299	4741.85	0.6958	0.0001	None significant
NKX2-3_3	4306	5947.71	0.724	0.0001	4312	5500.05	0.784	0.0001	None significant
NKX2-4_1	4722	7194.08	0.6564	0.0001	3990	6691.8	0.5963	0.0001	None significant
NKX2-5_1	1136	1940.87	0.5855	0.0001	891	1807.2	0.4933	0.0001	None significant
NKX2-5_2	579	1247.82	0.4644	0.0001	461	1167.91	0.3952	0.0001	None significant
NKX2-5_3	9342	8942.25	1.0447	0.0866	7029	8241.47	0.8529	0.0001	None significant
NKX2-5_4	1230	1989.43	0.6185	0.0001	912	1858.29	0.491	0.0001	None significant
NKX2-5_5	5020	7039.98	0.7131	0.0001	4145	6530.53	0.6348	0.0001	None significant
NKX2-6_1	4173	6740.66	0.6191	0.0001	3619	6257.36	0.5784	0.0001	None significant
NKX2-8_1	1894	3703.12	0.5116	0.0001	1453	3491	0.4164	0.0001	None significant
NKX2-8_2	4398	5623.3	0.7821	0.0001	4216	5207.57	0.8096	0.0001	None significant
NKX2-8_3	4285	5509.67	0.7778	0.0001	4043	5094.11	0.7937	0.0001	None significant
NKX3-1_1	757	1618.17	0.4681	0.0001	352	1510.95	0.2335	0.0001	None significant
NKX3-1_3	4313	6214.5	0.6941	0.0001	3976	5771.9	0.6889	0.0001	None significant
NKX3-1_4	1910	4327.07	0.4415	0.0001	1705	4039.72	0.4222	0.0001	None significant
NKX3-1_5	2304	3572.01	0.6451	0.0001	2400	3318.52	0.7233	0.0001	None significant
NKX3-1_6	2184	3523.74	0.6199	0.0001	2246	3287.29	0.6833	0.0001	None significant
NKX3-2_1	5516	6467.58	0.8529	0.0001	5172	5967.52	0.8667	0.0001	None significant
NKX3-2_2	3927	6330.34	0.6204	0.0001	3498	5896.76	0.5933	0.0001	None significant
NKX3-2_3	2107	3333.91	0.6321	0.0001	1961	3104.69	0.6317	0.0001	None significant
NKX6-1_1	1647	3492.26	0.4718	0.0001	943	3273.46	0.2883	0.0001	None significant
NKX6-1_2	1498	3156.25	0.4748	0.0001	960	2975.54	0.3229	0.0001	None significant
NKX6-1_3	1462	3084.6	0.4741	0.0001	781	2876.73	0.2717	0.0001	None significant
NKX6-1_4	535	1131.33	0.4734	0.0001	357	1061.84	0.3368	0.0001	None significant
NKX6-1_5	628	1076.91	0.5835	0.0001	307	1008	0.3053	0.0001	None significant
NKX6-1_6	628	1075.54	0.5843	0.0001	307	1004.56	0.3063	0.0001	None significant
NKX6-2_1	1258	2386.21	0.5274	0.0001	689	2238.2	0.3081	0.0001	None significant
NKX6-2_2	821	1759.19	0.467	0.0001	574	1648.22	0.3486	0.0001	None significant
NKX6-2_3	883	1451.73	0.6085	0.0001	547	1357.04	0.4035	0.0001	None significant
NKX6-3_1	1509	3281.95	0.46	0.0001	1038	3071.34	0.3382	0.0001	None significant
NOBOX_1	1076	1835.27	0.5865	0.0001	491	1719.86	0.2859	0.0001	None significant
NOBOX_2	5040	3213.02	1.5684	0.0001	1597	2954.19	0.5407	0.0001	Only upstream significant
NOTO_1	1101	2003.61	0.5497	0.0001	794	1872.67	0.4243	0.0001	None significant
NR1H4_1	4179	5849.02	0.7145	0.0001	3922	5425.72	0.7229	0.0001	None significant
NR1H4_2	4376	5856.7	0.7472	0.0001	4102	5435.83	0.7547	0.0001	None significant
NR1H4_3	7307	8437.94	0.866	0.0001	7982	7749.06	1.0301	0.2145	None significant
NR1H_1	39242	27022.9	1.4522	0.0001	40857	24520.5	1.6662	0.0001	Both significant
NR1H_2	22582	15646.8	1.4432	0.0001	22006	14203.3	1.5493	0.0001	Both significant
NR1H_3	42565	29787.4	1.4289	0.0001	41638	27065	1.5384	0.0001	Both significant
NR2C2_known1	16976	14850.5	1.1431	0.0001	17143	13551.9	1.265	0.0001	Both significant
NR2E1_1	1815	3109.27	0.5839	0.0001	1208	2902.01	0.4165	0.0001	None significant
NR2E1_2	3356	5999.77	0.5594	0.0001	2885	5573.06	0.5178	0.0001	None significant
NR2E1_3	1735	3065.1	0.5662	0.0001	1205	2868.84	0.4202	0.0001	None significant
NR2E1_4	4743	6981.74	0.6794	0.0001	3875	6466.99	0.5993	0.0001	None significant
NR2E1__NFIC_1	16071	18856.7	0.8523	0.0001	14822	17302.6	0.8566	0.0001	None significant
NR2E3_1	1350	1705.26	0.7918	0.0001	1064	1582.24	0.6727	0.0001	None significant
NR2F2_1	18031	18353.2	0.9824	0.2591	18674	16747.2	1.115	0.0001	Only downstream significant
NR2F2_2	12059	13025.2	0.9258	0.009	11683	11952.5	0.9775	0.2577	None significant
NR2F6_1	9616	10939.3	0.879	0.0001	10565	10033.6	1.053	0.0794	None significant
NR2F6_2	11940	11724.3	1.0184	0.2921	11767	10733.8	1.0963	0.0042	Only downstream significant
NR2F6_3	14091	13617.5	1.0348	0.1154	13970	12525.2	1.1153	0.0001	Only downstream significant
NR2F6_4	8145	9938.16	0.8196	0.0001	7876	9147.57	0.861	0.0001	None significant
NR2F6_5	7749	8516.4	0.9099	0.012	7208	7841.03	0.9193	0.0224	None significant
NR3C1_known1	14679	22429.8	0.6545	0.0001	16536	20640.5	0.8012	0.0001	None significant
NR3C1_known10	17428	21606.6	0.8066	0.0001	16963	19952.7	0.8502	0.0001	None significant
NR3C1_known11	5683	8733.66	0.6507	0.0001	5769	8075.15	0.7144	0.0001	None significant
NR3C1_known12	8107	11250.7	0.7206	0.0001	7818	10376	0.7535	0.0001	None significant
NR3C1_known13	17720	14289.7	1.24	0.0001	17380	13136.5	1.323	0.0001	Both significant
NR3C1_known14	6939	8069.21	0.86	0.0015	6617	7449.5	0.8883	0.0066	None significant
NR3C1_known15	7504	6708.7	1.1185	0.0074	7320	6158.71	1.1885	0.0001	Only downstream significant
NR3C1_known16	7411	8007.72	0.9255	0.0452	7953	7357.51	1.0809	0.0449	None significant
NR3C1_known17	6495	6549.92	0.9916	0.4325	6437	6006.73	1.0716	0.0839	None significant
NR3C1_known18	3741	5632.9	0.6642	0.0001	4334	5186.77	0.8356	0.0015	None significant
NR3C1_known2	8499	12796.7	0.6642	0.0001	7825	11863.5	0.6596	0.0001	None significant
NR3C1_known3	3734	6105.67	0.6116	0.0001	3081	5685.35	0.542	0.0001	None significant
NR3C1_known4	9349	8487.69	1.1015	0.0089	9670	7779.62	1.243	0.0001	Only downstream significant
NR3C1_known5	3931	7312.8	0.5376	0.0001	3901	6791.55	0.5745	0.0001	None significant
NR3C1_known6	15120	18229.7	0.8294	0.0001	15289	16851.2	0.9073	0.0075	None significant
NR3C1_known7	19913	23008.4	0.8655	0.0001	19641	21209	0.9261	0.0135	None significant
NR3C1_known8	15161	20374.4	0.7441	0.0001	15738	18839	0.8354	0.0001	None significant
NR3C1_known9	19039	22444.4	0.8483	0.0001	19616	20712.4	0.9471	0.0634	None significant
NR3C2_1	4441	6204.88	0.7158	0.0001	4852	5750.25	0.8438	0.0015	None significant
NR4A_known1	4585	6089.88	0.7529	0.0001	4217	5606.91	0.7522	0.0001	None significant
NR4A_known2	4985	6328.94	0.7877	0.0001	5105	5866.54	0.8702	0.0045	None significant
NR4A_known3	2648	3754.02	0.7055	0.0001	1817	3524.91	0.5156	0.0001	None significant
NR4A_known4	3505	5203.52	0.6736	0.0001	2684	4836.44	0.555	0.0001	None significant
NR5A1_1	4536	6077.34	0.7464	0.0001	4580	5601.72	0.8176	0.0001	None significant
NR5A1_2	5329	7482.6	0.7122	0.0001	5459	6911.99	0.7898	0.0001	None significant
NR5A2_1	19929	18761.4	1.0622	0.0089	20531	17114.5	1.1996	0.0001	Only downstream significant
NR6A1_1	8277	10642.5	0.7777	0.0001	8790	9814.9	0.8956	0.012	None significant
NRF1_known1	29796	10211.3	2.9177	0.0001	12636	9195.06	1.3742	0.0001	Both significant
NRF1_known2	36769	12480.3	2.946	0.0001	14809	11243.8	1.3171	0.0001	Both significant
NRL_1	5046	8690.12	0.5807	0.0001	4528	8079.91	0.5605	0.0001	None significant
OBOX2_1	4623	5082.53	0.9096	0.039	3397	4729.82	0.7183	0.0001	None significant
OBOX3_1	4810	5057.8	0.951	0.1728	3721	4669.35	0.7969	0.0001	None significant
OBOX5_1	3401	4108.4	0.8279	0.0001	2085	3851.75	0.5414	0.0001	None significant
OBOX5_2	3068	4249.21	0.7221	0.0001	2012	3975.97	0.5062	0.0001	None significant
OBOX6_1	1799	2131.5	0.8441	0.023	1517	1981.36	0.7658	0.0015	None significant
OLIG1_1	506	1530.99	0.3309	0.0001	400	1439.96	0.2783	0.0001	None significant
OLIG2_1	484	1344.97	0.3603	0.0001	410	1265.69	0.3245	0.0001	None significant
OLIG2_2	484	1452.63	0.3336	0.0001	500	1362.02	0.3676	0.0001	None significant
OLIG3_1	634	1887.79	0.3362	0.0001	586	1784.41	0.3288	0.0001	None significant
ONECUT1_1	1094	2507.97	0.4364	0.0001	717	2364.66	0.3035	0.0001	None significant
ONECUT1_2	982	1698.72	0.5783	0.0001	797	1598.9	0.4988	0.0001	None significant
ONECUT1_3	815	1473.24	0.5535	0.0001	684	1371.16	0.4992	0.0001	None significant
ONECUT2_1	864	1636.92	0.5281	0.0001	769	1536.41	0.5008	0.0001	None significant
ONECUT3_1	1620	2432.62	0.6661	0.0001	952	2292.51	0.4155	0.0001	None significant
OSR1_1	8767	9235.91	0.9492	0.111	8057	8540.97	0.9433	0.1051	None significant
OSR2_1	9278	9601.56	0.9663	0.2091	8569	8839.96	0.9694	0.2236	None significant
OTP_1	1036	1925.85	0.5382	0.0001	558	1799.11	0.3105	0.0001	None significant
OTX1_1	3505	4344.72	0.8068	0.0001	2914	4034.97	0.7223	0.0001	None significant
OTX1_2	1325	1514.78	0.8748	0.0909	976	1413.55	0.6907	0.0001	None significant
OTX1_3	1295	1069.84	1.2103	0.0059	952	983.543	0.968	0.3668	None significant
OTX1_4	1282	1473.97	0.8698	0.1048	786	1381.78	0.5691	0.0001	None significant
OTX1_5	1160	1005.33	1.1537	0.0419	847	924.083	0.9167	0.1826	None significant
OTX2_1	3842	4354.71	0.8823	0.012	2756	4059.8	0.6789	0.0001	None significant
OTX2_2	1040	1607.64	0.6471	0.0001	644	1495.05	0.4311	0.0001	None significant
OTX2_3	1385	1527.34	0.9069	0.0765	1032	1427.54	0.7231	0.0001	None significant
OTX_1	721	1264.44	0.5706	0.0001	353	1174.62	0.3011	0.0001	None significant
OVOL2_1	44248	25029	1.7678	0.0001	41136	22516.8	1.8269	0.0001	Both significant
PAX1_2	13851	9865.8	1.4039	0.0001	12386	8974.97	1.38	0.0001	Both significant
PAX2_1	17494	10902.9	1.6045	0.0001	14200	9942.58	1.4282	0.0001	Both significant
PAX2_2	7425	6356.9	1.168	0.0001	7053	5832.88	1.2091	0.0001	Both significant
PAX2_3	6308	2856.32	2.208	0.0001	3444	2588.1	1.3306	0.0001	Both significant
PAX2_4	22989	13683.2	1.68	0.0001	18139	12472.9	1.4542	0.0001	Both significant
PAX3_1	15200	8117.74	1.8723	0.0001	12584	7364.45	1.7087	0.0001	Both significant
PAX3_2	5439	3274.07	1.661	0.0001	4466	2979.96	1.4985	0.0001	Both significant
PAX3_3	247	593.86	0.4169	0.0001	198	553.582	0.3588	0.0001	None significant
PAX4_2	1440	2366.02	0.6088	0.0001	993	2218.3	0.4479	0.0001	None significant
PAX4_3	53291	37691.6	1.4139	0.0001	57119	34070.6	1.6765	0.0001	Both significant
PAX4_4	41010	33435.9	1.2265	0.0001	37423	30808.9	1.2147	0.0001	Both significant
PAX4_5	48508	36617.1	1.3247	0.0001	44170	33562.1	1.3161	0.0001	Both significant
PAX4_6	1255	2140.01	0.5866	0.0001	753	2021.36	0.3728	0.0001	None significant
PAX4_7	480	814.83	0.5896	0.0001	337	759.116	0.4447	0.0001	None significant
PAX4_8	185	279.956	0.662	0.0165	182	259.355	0.7029	0.039	None significant
PAX5_known1	194228	130174	1.4921	0.0001	193128	118134	1.6348	0.0001	Both significant
PAX5_known2	49924	29489.3	1.6929	0.0001	46357	26802.2	1.7296	0.0001	Both significant
PAX5_known3	9402	10745.4	0.875	0.0001	8094	9880.03	0.8192	0.0001	None significant
PAX5_known4	128759	69212.7	1.8603	0.0001	109807	62556.6	1.7553	0.0001	Both significant
PAX5_known5	26022	15043.8	1.7297	0.0001	20322	13675.3	1.486	0.0001	Both significant
PAX6_1	5683	6780.18	0.8382	0.0015	4995	6308.37	0.7918	0.0015	None significant
PAX6_2	20323	21072.8	0.9644	0.084	18914	19285.7	0.9807	0.2189	None significant
PAX6_3	3521	3973.52	0.8861	0.0165	2989	3714.33	0.8048	0.0001	None significant
PAX6_5	8752	8455.69	1.035	0.2141	6758	7785.43	0.868	0.0015	None significant
PAX7_1	1989	2314.24	0.8595	0.033	673	2158.53	0.3121	0.0001	None significant
PAX7_2	287	650.671	0.4419	0.0001	218	611.481	0.3576	0.0001	None significant
PAX7_3	219	531.94	0.4128	0.0001	218	502.417	0.435	0.0001	None significant
PAX8_1	12077	11907.4	1.0142	0.3599	10849	10925.9	0.993	0.4292	None significant
PAX8_2	14096	10676.9	1.3202	0.0001	12527	9747.75	1.2851	0.0001	Both significant
PAX9_1	13329	10116.5	1.3175	0.0001	11580	9254.77	1.2512	0.0001	Both significant
PBX1_1	1047	1589.35	0.659	0.0001	420	1487.91	0.2828	0.0001	None significant
PBX1_2	2377	3316.71	0.7168	0.0001	1338	3104.47	0.4312	0.0001	None significant
PBX1_3	2383	3421.55	0.6966	0.0001	1766	3166.74	0.5578	0.0001	None significant
PBX1_4	1833	2569.85	0.7134	0.0001	926	2397.01	0.3866	0.0001	None significant
PBX1_5	2749	4823.74	0.57	0.0001	2069	4488.73	0.4611	0.0001	None significant
PBX3_known1	5100	5833.05	0.8743	0.003	5130	5365.87	0.9561	0.1681	None significant
PDX1_1	1126	2620.04	0.43	0.0001	955	2452.14	0.3897	0.0001	None significant
PDX1_2	2827	5018.09	0.5634	0.0001	2569	4666.14	0.5507	0.0001	None significant
PDX1_4	1727	3469.66	0.4979	0.0001	1178	3227.56	0.3652	0.0001	None significant
PDX1_5	1078	2950	0.3656	0.0001	648	2748.91	0.236	0.0001	None significant
PDX1_6	870	1338.08	0.6504	0.0001	486	1251.49	0.3888	0.0001	None significant
PHOX2A_1	1530	2064.69	0.7412	0.0015	673	1930.3	0.349	0.0001	None significant
PHOX2A_2	670	1704.56	0.3934	0.0001	435	1610.96	0.2705	0.0001	None significant
PHOX2B_1	1336	2183.88	0.6119	0.0001	548	2053.96	0.2672	0.0001	None significant
PHOX2B_2	724	1610.62	0.4499	0.0001	420	1524.89	0.2759	0.0001	None significant
PHOX2B_3	724	1570.64	0.4613	0.0001	409	1478.65	0.2771	0.0001	None significant
PITX1_1	5458	5601.29	0.9744	0.2978	4190	5214.56	0.8036	0.0001	None significant
PITX1_2	2371	2507.82	0.9455	0.1739	2035	2322.93	0.8761	0.0192	None significant
PITX1_3	1924	2313.19	0.8318	0.003	1487	2142.77	0.6941	0.0001	None significant
PITX1_4	1215	1552.02	0.783	0.0015	906	1442.49	0.6283	0.0001	None significant
PITX2_1	3033	3741.27	0.8107	0.0001	2121	3465.68	0.6121	0.0001	None significant
PITX2_2	3629	4389.1	0.8269	0.0001	2644	4080.26	0.6481	0.0001	None significant
PITX3_1	10652	8164.32	1.3047	0.0001	9656	7510.95	1.2856	0.0001	Both significant
PITX3_2	2470	2538.93	0.9729	0.3186	2174	2351.14	0.9247	0.0885	None significant
PKNOX1_1	7910	10961.2	0.7217	0.0001	7112	10097.2	0.7044	0.0001	None significant
PKNOX1_2	3458	7020.1	0.4927	0.0001	3698	6489.25	0.5699	0.0001	None significant
PKNOX2_1	12130	14367.4	0.8443	0.0001	11270	13255.3	0.8502	0.0001	None significant
PKNOX2_2	4091	8437.03	0.4849	0.0001	4760	7803.24	0.6101	0.0001	None significant
PKNOX2_3	3407	7186.05	0.4742	0.0001	3467	6671.5	0.5197	0.0001	None significant
POU1F1_1	1128	2497.25	0.4519	0.0001	681	2355.46	0.2894	0.0001	None significant
POU1F1_2	2096	5551.41	0.3777	0.0001	1479	5212.18	0.2839	0.0001	None significant
POU1F1_3	1145	2515.27	0.4554	0.0001	627	2354.85	0.2666	0.0001	None significant
POU1F1_4	1809	4327.89	0.4181	0.0001	666	4035.8	0.1652	0.0001	None significant
POU1F1_5	2642	3863.98	0.6838	0.0001	1036	3618.39	0.2865	0.0001	None significant
POU2F2_1	3610	4541.56	0.7949	0.0001	1107	4229.26	0.2619	0.0001	None significant
POU2F2_2	2331	2948.22	0.7907	0.0001	804	2765.65	0.291	0.0001	None significant
POU2F2_3	1467	3024.74	0.4852	0.0001	708	2847.3	0.2489	0.0001	None significant
POU2F2_4	1262	2534	0.4982	0.0001	718	2374.82	0.3026	0.0001	None significant
POU2F2_5	1604	2219.15	0.7229	0.0001	482	2063	0.234	0.0001	None significant
POU2F2_known1	3572	4911.9	0.7273	0.0001	1432	4610.02	0.3108	0.0001	None significant
POU2F2_known10	2553	3720.1	0.6864	0.0001	1110	3462.6	0.3208	0.0001	None significant
POU2F2_known11	2720	3809.22	0.7141	0.0001	957	3557.76	0.2692	0.0001	None significant
POU2F2_known12	2934	4211.07	0.6968	0.0001	1177	3947.14	0.2984	0.0001	None significant
POU2F2_known13	2880	5004.79	0.5755	0.0001	1643	4662.18	0.3525	0.0001	None significant
POU2F2_known14	966	2716.3	0.3559	0.0001	434	2557	0.1701	0.0001	None significant
POU2F2_known15	2342	3080.61	0.7603	0.0001	781	2889.41	0.2705	0.0001	None significant
POU2F2_known16	1417	2843.19	0.4986	0.0001	703	2660.04	0.2646	0.0001	None significant
POU2F2_known2	1569	3212.64	0.4885	0.0001	961	3001.93	0.3204	0.0001	None significant
POU2F2_known3	1670	2572.57	0.6493	0.0001	1431	2405.46	0.5951	0.0001	None significant
POU2F2_known4	3611	6269.15	0.5761	0.0001	1596	5905.46	0.2704	0.0001	None significant
POU2F2_known5	2860	4353.9	0.657	0.0001	1766	4092.7	0.4316	0.0001	None significant
POU2F2_known6	1776	4003.32	0.4438	0.0001	1175	3756.39	0.313	0.0001	None significant
POU2F2_known7	4580	6490.03	0.7057	0.0001	3067	6024.93	0.5091	0.0001	None significant
POU2F2_known8	3057	4380.78	0.6979	0.0001	1562	4101.26	0.381	0.0001	None significant
POU2F2_known9	1423	2531.32	0.5623	0.0001	745	2380.75	0.3132	0.0001	None significant
POU2F3_1	3551	4516.12	0.7863	0.0001	1123	4212.45	0.2668	0.0001	None significant
POU2F3_2	2010	2499.15	0.8044	0.0001	560	2333.99	0.2403	0.0001	None significant
POU2F3_3	1127	2506.52	0.4498	0.0001	656	2346.75	0.2798	0.0001	None significant
POU3F1_1	1120	2416.19	0.4638	0.0001	476	2285.28	0.2086	0.0001	None significant
POU3F1_2	2137	3172.69	0.6737	0.0001	754	2962.92	0.2547	0.0001	None significant
POU3F1_3	1313	3162.59	0.4154	0.0001	848	2972.26	0.2855	0.0001	None significant
POU3F2_1	2221	3713.1	0.5983	0.0001	1403	3488	0.4024	0.0001	None significant
POU3F2_2	1616	3438.41	0.4701	0.0001	773	3230.25	0.2395	0.0001	None significant
POU3F2_3	945	1685.22	0.561	0.0001	440	1569.64	0.2808	0.0001	None significant
POU3F2_4	1323	2465.1	0.5369	0.0001	619	2302.57	0.2691	0.0001	None significant
POU3F2_5	1359	3003.56	0.4526	0.0001	662	2806.51	0.2362	0.0001	None significant
POU3F2_6	2158	3186.75	0.6773	0.0001	764	2989.16	0.2558	0.0001	None significant
POU3F3_1	1469	3479.35	0.4224	0.0001	839	3266.13	0.2571	0.0001	None significant
POU3F3_2	2029	3142.73	0.6457	0.0001	752	2959.57	0.2543	0.0001	None significant
POU3F3_3	1217	2955.93	0.4119	0.0001	710	2795.12	0.2543	0.0001	None significant
POU3F3_4	993	2445.85	0.4062	0.0001	647	2288.38	0.283	0.0001	None significant
POU3F4_1	1111	2462.86	0.4513	0.0001	567	2313.06	0.2455	0.0001	None significant
POU3F4_2	1770	2242.44	0.7894	0.0001	537	2084.6	0.258	0.0001	None significant
POU3F4_3	1065	2588.27	0.4117	0.0001	627	2430.53	0.2583	0.0001	None significant
POU4F1_1	1170	3500.73	0.3344	0.0001	638	3296.17	0.1938	0.0001	None significant
POU4F2_1	1640	4237.51	0.3872	0.0001	822	4009.4	0.2052	0.0001	None significant
POU4F2_2	1450	4310.72	0.3365	0.0001	780	4050.71	0.1928	0.0001	None significant
POU4F3_1	1255	3149.25	0.3987	0.0001	800	2928.55	0.2734	0.0001	None significant
POU4F3_2	1568	4164.04	0.3767	0.0001	844	3895.53	0.2169	0.0001	None significant
POU5F1_known1	2507	5600.85	0.4477	0.0001	2098	5270.2	0.3982	0.0001	None significant
POU5F1_known2	2474	5376.87	0.4602	0.0001	1260	5028.62	0.2507	0.0001	None significant
POU5F1_known3	2907	6053.05	0.4803	0.0001	1860	5717.28	0.3254	0.0001	None significant
POU5F1_known4	1997	2506.63	0.7968	0.0001	602	2327.67	0.2589	0.0001	None significant
POU5F1_known5	973	2271.68	0.4286	0.0001	606	2148.86	0.2823	0.0001	None significant
POU6F1_1	840	1993.22	0.4217	0.0001	549	1876.31	0.293	0.0001	None significant
POU6F1_2	2169	4937.66	0.4394	0.0001	1786	4650.55	0.3842	0.0001	None significant
POU6F1_3	2190	5132.87	0.4268	0.0001	1825	4802.31	0.3802	0.0001	None significant
POU6F2_1	1102	2759.05	0.3996	0.0001	923	2575.42	0.3586	0.0001	None significant
POU6F2_2	898	2206.57	0.4072	0.0001	322	2061.32	0.1566	0.0001	None significant
POU6F2_3	1127	2453.86	0.4595	0.0001	860	2289	0.376	0.0001	None significant
PPARA_1	10548	14504.9	0.7272	0.0001	10495	13427.5	0.7816	0.0001	None significant
PPARA_2	53458	38956.9	1.3722	0.0001	59529	35262	1.6882	0.0001	Both significant
PPARA_3	15471	16140.1	0.9585	0.0852	15871	14799.9	1.0724	0.0179	None significant
PPARA_4	18984	21447	0.8852	0.0001	21599	19595.7	1.1022	0.0001	Only downstream significant
PRDM1_known2	12105	13293.7	0.9106	0.003	10626	12356.7	0.86	0.0001	None significant
PRDM4_1	13124	11977.4	1.0957	0.0001	13875	10997.5	1.2616	0.0001	Both significant
PROP1_1	1262	2129.74	0.5928	0.0001	715	1999.82	0.3579	0.0001	None significant
PROP1_2	514	1369.13	0.3759	0.0001	303	1290.12	0.2355	0.0001	None significant
PROP1_3	664	1443.5	0.4604	0.0001	409	1365.64	0.3	0.0001	None significant
PROX1_1	3920	2827.25	1.3864	0.0001	3104	2594.34	1.1964	0.0001	Both significant
PRRX1_1	1498	2431.11	0.6163	0.0001	643	2287.59	0.2814	0.0001	None significant
PRRX1_2	1130	1368.89	0.8256	0.012	481	1279.98	0.3763	0.0001	None significant
PRRX1_3	1187	1347.23	0.8812	0.0518	447	1255.07	0.3567	0.0001	None significant
PRRX1_4	602	1515.57	0.3976	0.0001	405	1422.19	0.2853	0.0001	None significant
PRRX2_1	1548	2699.75	0.5735	0.0001	747	2536.88	0.2947	0.0001	None significant
PRRX2_3	1481	2348.61	0.6307	0.0001	701	2191.63	0.3202	0.0001	None significant
PRRX2_4	1187	1342.94	0.884	0.0661	447	1259.75	0.3553	0.0001	None significant
PRRX2_5	862	1111.72	0.7756	0.003	342	1035.79	0.3308	0.0001	None significant
PTEN_1	15487	15379.7	1.007	0.4116	13601	14068.5	0.9668	0.132	None significant
PTF1A_1	22939	18207.9	1.2598	0.0001	22865	16676.2	1.3711	0.0001	Both significant
RARA_1	10822	12818.9	0.8442	0.0001	10188	11827.2	0.8614	0.0001	None significant
RARA_10	6862	9135.59	0.7512	0.0001	6676	8441.78	0.7909	0.0001	None significant
RARA_2	13514	15378.7	0.8788	0.0001	14000	14074.3	0.9947	0.44	None significant
RARA_3	6948	9437.76	0.7362	0.0001	6171	8716.22	0.708	0.0001	None significant
RARA_4	15419	17458.9	0.8832	0.0001	17728	15968.1	1.1102	0.0001	Only downstream significant
RARA_5	6089	7815.11	0.7792	0.0001	5712	7244.99	0.7884	0.0001	None significant
RARA_6	22669	22606.3	1.0028	0.449	23776	20678.5	1.1498	0.0001	Only downstream significant
RARA_7	13445	16231	0.8284	0.0001	15498	14939.5	1.0374	0.1424	None significant
RARA_8	16458	19057.2	0.8636	0.0001	17023	17493.6	0.9731	0.1938	None significant
RARA_9	8330	10946.7	0.761	0.0001	8782	10104.7	0.8691	0.0001	None significant
RARB_1	6407	9049.28	0.708	0.0001	6156	8360.88	0.7363	0.0001	None significant
RARB_2	14118	17843.8	0.7912	0.0001	14356	16403.6	0.8752	0.0001	None significant
RARB_3	9278	12028	0.7714	0.0001	10005	11068.8	0.9039	0.0075	None significant
RARB_4	4668	7390.96	0.6316	0.0001	4411	6869.96	0.6421	0.0001	None significant
RARG_1	9353	10761.9	0.8691	0.0001	9193	9931.45	0.9257	0.0361	None significant
RARG_2	13292	15692.9	0.847	0.0001	15307	14374.5	1.0649	0.0255	None significant
RARG_3	16461	18179.5	0.9055	0.0015	16355	16604.4	0.985	0.3032	None significant
RARG_4	9185	10764	0.8533	0.0001	8749	9932.91	0.8808	0.0001	None significant
RARG_5	13243	15200.6	0.8712	0.0001	13913	13953.7	0.9971	0.4716	None significant
RARG_6	19235	18938.1	1.0157	0.3043	19705	17301.7	1.1389	0.0001	Only downstream significant
RARG_7	6885	8646.95	0.7963	0.0001	6217	7986.23	0.7785	0.0001	None significant
RARG_8	8191	11823	0.6928	0.0001	9076	10889.8	0.8335	0.0001	None significant
RARG_9	12658	15590.4	0.8119	0.0001	12723	14313.3	0.8889	0.0015	None significant
RAR_1	10361	13773.3	0.7523	0.0001	12238	12647.7	0.9676	0.096	None significant
RAX_1	2940	2804.45	1.0483	0.2564	1007	2600.34	0.3875	0.0001	None significant
RAX_2	1344	1879.98	0.7151	0.0001	530	1745.86	0.304	0.0001	None significant
RBPJ_1	5981	6808.71	0.8785	0.0015	5541	6286.61	0.8814	0.0001	None significant
RBPJ_2	8010	7912.54	1.0123	0.3663	7319	7282.12	1.0051	0.456	None significant
REL_1	12816	9282.46	1.3806	0.0001	10683	8475.74	1.2604	0.0001	Both significant
REL_2	13389	9288.11	1.4415	0.0001	11042	8495.21	1.2998	0.0001	Both significant
REST_known3	86080	74526.2	1.155	0.0001	98585	67920.8	1.4515	0.0001	Both significant
REST_known4	68319	61155.8	1.1171	0.0001	78925	55755.5	1.4155	0.0001	Both significant
RFX2_1	8097	6124.62	1.322	0.0001	3329	5641.92	0.5901	0.0001	Only upstream significant
RFX2_2	11560	9992.81	1.1568	0.0001	7999	9173.47	0.872	0.0015	Only upstream significant
RFX2_3	8989	6809.47	1.32	0.0001	4065	6241.41	0.6514	0.0001	Only upstream significant
RFX2_4	12837	10561.9	1.2154	0.0001	8837	9696.77	0.9113	0.003	Only upstream significant
RFX3_1	19860	16183.4	1.2272	0.0001	10921	14840.9	0.7359	0.0001	Only upstream significant
RFX3_2	9681	7574.59	1.2781	0.0001	4665	6944.52	0.6718	0.0001	Only upstream significant
RFX3_3	9708	8582.12	1.1312	0.0001	6004	7916.15	0.7585	0.0001	Only upstream significant
RFX3_4	8468	6636.9	1.2759	0.0001	3933	6069.12	0.6481	0.0001	Only upstream significant
RFX5_known1	12824	11394.8	1.1254	0.0001	10318	10466.1	0.9859	0.3612	Only upstream significant
RFX5_known2	17181	12872.9	1.3346	0.0001	12174	11827.2	1.0293	0.2217	Only upstream significant
RFX5_known3	6169	5725.52	1.0774	0.0254	4727	5278.23	0.8956	0.0135	None significant
RFX5_known4	6370	5128.63	1.242	0.0001	5030	4715.68	1.0666	0.0644	Only upstream significant
RFX5_known5	16353	11875	1.3771	0.0001	9646	10901.7	0.8848	0.0001	Only upstream significant
RFX5_known6	10379	7766.45	1.3363	0.0001	5268	7119.25	0.74	0.0001	Only upstream significant
RFX5_known7	11926	10227.6	1.166	0.0001	10197	9388.58	1.0861	0.0164	Only upstream significant
RFX5_known8	9474	7345.3	1.2898	0.0001	4353	6711.48	0.6486	0.0001	Only upstream significant
RFX5_known9	10558	8235.5	1.282	0.0001	5021	7573.77	0.663	0.0001	Only upstream significant
RFX7_1	17072	11359	1.5029	0.0001	10631	10406.8	1.0215	0.2804	Only upstream significant
RHOXF1_1	4459	5117.8	0.8713	0.009	3735	4743.71	0.7874	0.0001	None significant
RHOXF1_2	4701	5336.91	0.8809	0.0075	3854	4963.92	0.7764	0.0001	None significant
RHOXF1_3	2487	2650.58	0.9383	0.1276	2230	2445.04	0.9121	0.0647	None significant
RHOXF1_4	4853	5125.21	0.9469	0.0825	4960	4695.27	1.0564	0.0767	None significant
RHOXF1_5	2982	2679.14	1.113	0.0223	2732	2446.34	1.1167	0.027	None significant
RHOXF1_6	5244	5355.88	0.9791	0.2826	5154	4910.36	1.0496	0.0989	None significant
RHOXF1_7	2618	2953.33	0.8865	0.015	2205	2730.2	0.8077	0.0001	None significant
RHOXF2_1	1685	2676.36	0.6297	0.0001	1018	2495.4	0.4082	0.0001	None significant
RORA_1	3215	5922.33	0.5429	0.0001	2707	5501.68	0.4921	0.0001	None significant
RORA_2	2290	4391.52	0.5216	0.0001	2060	4107.96	0.5016	0.0001	None significant
RORA_3	2493	4772.34	0.5225	0.0001	2274	4442.09	0.512	0.0001	None significant
RORA_4	2789	5073.26	0.5498	0.0001	2596	4691.81	0.5534	0.0001	None significant
RORA_5	2579	5003.19	0.5156	0.0001	2319	4631.5	0.5008	0.0001	None significant
RORA_6	15495	18768.8	0.8256	0.0001	17031	17205.1	0.9899	0.3771	None significant
RORA_7	5163	8005.65	0.645	0.0001	5018	7400.96	0.6781	0.0001	None significant
RUNX1_1	850	1575.5	0.5398	0.0001	575	1463.45	0.3933	0.0001	None significant
RUNX1_2	1998	4479.04	0.4462	0.0001	1823	4174.67	0.4368	0.0001	None significant
RUNX1_3	1511	2952.69	0.5119	0.0001	1180	2754.55	0.4286	0.0001	None significant
RUNX1_4	1045	2271.88	0.4602	0.0001	810	2131.48	0.3803	0.0001	None significant
RUNX1_5	2564	4657.01	0.5507	0.0001	1764	4403.64	0.4007	0.0001	None significant
RUNX1_6	1092	2199.99	0.4966	0.0001	727	2072.97	0.351	0.0001	None significant
RUNX1_8	1897	3697.25	0.5132	0.0001	1469	3465.55	0.4241	0.0001	None significant
RUNX1_9	10931	15088.5	0.7245	0.0001	10607	13917.8	0.7621	0.0001	None significant
RUNX2_2	1858	3949.9	0.4705	0.0001	1807	3674.33	0.4919	0.0001	None significant
RUNX2_3	2354	3881.71	0.6065	0.0001	2341	3594.46	0.6514	0.0001	None significant
RUNX2_4	30831	17763.5	1.7356	0.0001	30472	16188.3	1.8823	0.0001	Both significant
RUNX2_5	40662	23841.4	1.7055	0.0001	40602	21644	1.8759	0.0001	Both significant
RUNX2_6	3300	2798.65	1.1791	0.0015	2930	2585.55	1.1332	0.0044	Both significant
RUNX3_1	35409	20711	1.7096	0.0001	35536	18775	1.8927	0.0001	Both significant
RUNX3_2	4168	3708.15	1.124	0.0133	3601	3415.79	1.0542	0.1481	None significant
RUNX3_3	60469	34052.7	1.7757	0.0001	59277	30862.5	1.9207	0.0001	Both significant
RUNX3_4	4198	4064.78	1.0328	0.2846	3689	3748.78	0.9841	0.3674	None significant
RUNX_1	14331	15688	0.9135	0.0015	14403	14418.9	0.9989	0.4855	None significant
RUNX_2	12153	13216.2	0.9196	0.006	11759	12148	0.968	0.1823	None significant
RXRA_known1	15958	16069.3	0.9931	0.4419	15300	14758.1	1.0367	0.1662	None significant
RXRA_known10	11939	11223	1.0638	0.0314	11349	10305.9	1.1012	0.0029	Only downstream significant
RXRA_known11	15057	10730.4	1.4032	0.0001	15431	9686.88	1.5929	0.0001	Both significant
RXRA_known12	10997	10715.8	1.0262	0.2242	10543	9811.39	1.0746	0.0134	None significant
RXRA_known14	12928	12292.9	1.0517	0.0404	12940	11235.7	1.1517	0.0001	Only downstream significant
RXRA_known15	9436	6835.35	1.3804	0.0001	8809	6216.06	1.4171	0.0001	Both significant
RXRA_known2	7219	10159.6	0.7106	0.0001	7613	9401.24	0.8098	0.0001	None significant
RXRA_known3	2598	3724.37	0.6976	0.0001	2389	3445.31	0.6935	0.0001	None significant
RXRA_known4	2999	3980.05	0.7536	0.0001	2925	3679.52	0.795	0.0001	None significant
RXRA_known5	16043	18279.4	0.8777	0.0015	17824	16763.8	1.0632	0.0299	None significant
RXRA_known6	8485	10115.8	0.8388	0.0001	7274	9339.14	0.7789	0.0001	None significant
RXRA_known7	55533	48883.4	1.136	0.0001	57849	44475.8	1.3007	0.0001	Both significant
RXRA_known8	29385	25719.5	1.1425	0.0001	30621	23432.6	1.3068	0.0001	Both significant
RXRA_known9	22771	19109.2	1.1916	0.0001	24540	17414.1	1.4092	0.0001	Both significant
RXRB_1	10812	10742.2	1.0065	0.4422	10332	9862.23	1.0476	0.1068	None significant
RXRB_2	11723	11361.3	1.0318	0.1689	11475	10416.1	1.1017	0.0014	Only downstream significant
RXRG_1	10031	9853.68	1.018	0.2978	9397	9043.84	1.039	0.153	None significant
RXRG_2	9816	7429.56	1.3212	0.0001	9859	6771.12	1.456	0.0001	Both significant
RXRG_3	9942	10479.2	0.9487	0.0719	8891	9627.71	0.9235	0.0195	None significant
SCRT1_1	7858	10838.1	0.7251	0.0001	8156	10028.3	0.8133	0.0001	None significant
SCRT2_1	6708	8888.53	0.7547	0.0001	6387	8200.67	0.7789	0.0001	None significant
SEF1_1	26809	21079.3	1.2718	0.0001	28088	19249.7	1.4591	0.0001	Both significant
SHOX2_1	1449	2148.51	0.6746	0.0001	645	2006.77	0.3218	0.0001	None significant
SHOX2_2	895	1043.22	0.8581	0.0423	375	972.255	0.3863	0.0001	None significant
SHOX2_3	895	1040.35	0.8604	0.0475	375	979.668	0.3834	0.0001	None significant
SHOX_1	895	1031.87	0.8675	0.048	375	974.171	0.3856	0.0001	None significant
SIX5_known1	1870	3541.09	0.5282	0.0001	2094	3272.12	0.6401	0.0001	None significant
SIX5_known2	2449	3867.86	0.6333	0.0001	2505	3584.69	0.6989	0.0001	None significant
SIX5_known3	2572	3897.9	0.6599	0.0001	2726	3618.25	0.7535	0.0001	None significant
SIX5_known4	2213	3485.63	0.635	0.0001	2067	3249.21	0.6363	0.0001	None significant
SIX5_known5	7459	9099.14	0.8198	0.0001	7773	8361.7	0.9296	0.0435	None significant
SIX5_known6	1776	3089.21	0.575	0.0001	1740	2851.35	0.6104	0.0001	None significant
SIX5_known7	1535	3108.62	0.494	0.0001	1612	2902.88	0.5555	0.0001	None significant
SMAD3_1	8825	10057.5	0.8775	0.0001	8344	9224.94	0.9045	0.0015	None significant
SMAD3_2	16775	16815	0.9976	0.4538	17139	15449.8	1.1093	0.0014	Only downstream significant
SMAD3_3	1830	1903.06	0.9616	0.307	1591	1750.3	0.909	0.099	None significant
SMAD4_1	37509	30360	1.2355	0.0001	36006	27657.6	1.3018	0.0001	Both significant
SMAD_1	9601	8301.79	1.1565	0.0001	9106	7597.54	1.1985	0.0001	Both significant
SMAD_2	9808	14140.9	0.6936	0.0001	9983	12998.8	0.768	0.0001	None significant
SNAI2_1	10659	14056.4	0.7583	0.0001	11468	12927.3	0.8871	0.0001	None significant
SOX10_1	1995	2767.79	0.7209	0.0001	1921	2543.98	0.7552	0.0001	None significant
SOX10_10	1958	4762.07	0.4113	0.0001	1309	4446.59	0.2945	0.0001	None significant
SOX10_3	2244	5131.87	0.4374	0.0001	1685	4795.43	0.3515	0.0001	None significant
SOX10_5	1575	4139.84	0.3806	0.0001	1250	3857.89	0.3242	0.0001	None significant
SOX10_7	2989	6315.01	0.4734	0.0001	2130	5927.39	0.3595	0.0001	None significant
SOX10_8	2402	5043.86	0.4763	0.0001	1651	4736.54	0.3487	0.0001	None significant
SOX11_1	7215	10834.4	0.666	0.0001	6403	10098.4	0.6341	0.0001	None significant
SOX11_2	2152	4775.99	0.4507	0.0001	1404	4463.59	0.3147	0.0001	None significant
SOX12_1	1942	3678.29	0.5281	0.0001	1019	3443.85	0.2961	0.0001	None significant
SOX13_1	1505	3377.11	0.4458	0.0001	1004	3158.7	0.3181	0.0001	None significant
SOX14_1	800	1774.83	0.4511	0.0001	516	1683.59	0.3069	0.0001	None significant
SOX14_2	1645	3032.51	0.5426	0.0001	928	2840.8	0.3269	0.0001	None significant
SOX14_3	1947	4183.75	0.4655	0.0001	1282	3920.05	0.3272	0.0001	None significant
SOX14_4	1818	3799.6	0.4786	0.0001	1205	3535.18	0.341	0.0001	None significant
SOX15_1	2031	3674.75	0.5528	0.0001	1499	3453.84	0.4342	0.0001	None significant
SOX15_2	1544	3626.21	0.4259	0.0001	1126	3410.26	0.3304	0.0001	None significant
SOX15_3	1495	2820.66	0.5302	0.0001	906	2635.3	0.344	0.0001	None significant
SOX15_4	1511	3628.42	0.4166	0.0001	795	3419.09	0.2327	0.0001	None significant
SOX17_2	1674	3466.88	0.483	0.0001	1660	3225.87	0.5147	0.0001	None significant
SOX17_3	1320	2929.21	0.4508	0.0001	651	2757.42	0.2364	0.0001	None significant
SOX17_4	1293	3264.72	0.3962	0.0001	1017	3079.11	0.3305	0.0001	None significant
SOX17_5	1358	3594.9	0.3779	0.0001	795	3398.09	0.2342	0.0001	None significant
SOX18_1	1884	3833.15	0.4916	0.0001	1083	3585.07	0.3023	0.0001	None significant
SOX18_2	1443	3388.99	0.426	0.0001	1081	3172.61	0.3409	0.0001	None significant
SOX18_3	1363	3019.02	0.4517	0.0001	803	2813.81	0.2856	0.0001	None significant
SOX18_4	1278	3426.62	0.3731	0.0001	768	3204.95	0.2399	0.0001	None significant
SOX1_1	1243	2968.8	0.4189	0.0001	854	2797.21	0.3056	0.0001	None significant
SOX1_2	2125	3768.57	0.564	0.0001	1151	3547.93	0.3246	0.0001	None significant
SOX1_3	1715	4071.48	0.4214	0.0001	1254	3813.45	0.329	0.0001	None significant
SOX1_4	1564	2981.38	0.5247	0.0001	1007	2787.8	0.3614	0.0001	None significant
SOX1_5	1248	2603.65	0.4795	0.0001	785	2445.61	0.3213	0.0001	None significant
SOX21_1	896	1919.63	0.467	0.0001	466	1795.55	0.2599	0.0001	None significant
SOX21_2	2077	4365.44	0.4759	0.0001	1562	4087.88	0.3823	0.0001	None significant
SOX21_3	1698	4280.78	0.3968	0.0001	1312	4024.2	0.3262	0.0001	None significant
SOX21_4	1406	2930.84	0.4799	0.0001	924	2737.51	0.3378	0.0001	None significant
SOX21_5	2034	3418.27	0.5952	0.0001	1178	3187.14	0.3698	0.0001	None significant
SOX2_1	3866	7238.58	0.5341	0.0001	3202	6781.51	0.4722	0.0001	None significant
SOX2_2	1751	3735.08	0.4689	0.0001	1102	3506.56	0.3145	0.0001	None significant
SOX2_3	1797	3793.72	0.4738	0.0001	1071	3565.85	0.3005	0.0001	None significant
SOX2_4	1702	3464.17	0.4915	0.0001	988	3249.12	0.3043	0.0001	None significant
SOX2_5	1861	4352.22	0.4277	0.0001	1411	4065.64	0.3472	0.0001	None significant
SOX2_6	1519	3278.26	0.4635	0.0001	1056	3063.46	0.3449	0.0001	None significant
SOX2_7	1933	4208.69	0.4594	0.0001	1299	3960.06	0.3282	0.0001	None significant
SOX30_1	2489	4366.07	0.5702	0.0001	1760	4067.76	0.4328	0.0001	None significant
SOX3_1	1313	3180.37	0.413	0.0001	827	2990.02	0.2768	0.0001	None significant
SOX3_2	1724	3658.37	0.4714	0.0001	1217	3444.87	0.3535	0.0001	None significant
SOX3_3	1786	4358.73	0.4099	0.0001	1226	4121.29	0.2976	0.0001	None significant
SOX4_1	8048	11483	0.7009	0.0001	7645	10706.7	0.7141	0.0001	None significant
SOX4_2	2684	5664.68	0.4739	0.0001	2018	5343.29	0.3778	0.0001	None significant
SOX5_1	792	1897.29	0.4177	0.0001	799	1777.89	0.4497	0.0001	None significant
SOX5_3	1607	3487.63	0.4609	0.0001	1058	3280.34	0.3227	0.0001	None significant
SOX7_1	2444	5324.68	0.4591	0.0001	1559	4987.02	0.3127	0.0001	None significant
SOX7_2	1379	3490.64	0.3952	0.0001	1035	3285.8	0.3152	0.0001	None significant
SOX7_3	2198	4550.01	0.4832	0.0001	1484	4258.08	0.3487	0.0001	None significant
SOX7_4	1832	4527.56	0.4048	0.0001	1077	4258.63	0.2531	0.0001	None significant
SOX8_1	1517	3429.06	0.4426	0.0001	806	3207.59	0.2515	0.0001	None significant
SOX8_3	2868	4767.03	0.6017	0.0001	2099	4447.54	0.4721	0.0001	None significant
SOX8_4	2768	6117.13	0.4526	0.0001	2193	5721.42	0.3834	0.0001	None significant
SOX8_5	1772	4645.42	0.3816	0.0001	1388	4362.94	0.3183	0.0001	None significant
SOX8_6	3392	6568.94	0.5164	0.0001	2261	6121.89	0.3694	0.0001	None significant
SOX8_7	2515	5469.76	0.4599	0.0001	1871	5137.05	0.3643	0.0001	None significant
SOX8_8	2712	4372.53	0.6203	0.0001	1795	4078.55	0.4402	0.0001	None significant
SOX8_9	1863	4740.74	0.3931	0.0001	1214	4423.2	0.2746	0.0001	None significant
SOX9_1	3458	4732.36	0.7308	0.0001	2302	4406.17	0.5226	0.0001	None significant
SOX9_2	1901	2495.96	0.7617	0.0001	1138	2326.26	0.4894	0.0001	None significant
SOX9_3	1548	2611.98	0.5928	0.0001	1183	2447.2	0.4836	0.0001	None significant
SOX9_6	2078	5345.87	0.3888	0.0001	1173	5012.29	0.2342	0.0001	None significant
SOX9_7	2560	5696.53	0.4495	0.0001	1772	5359.08	0.3308	0.0001	None significant
SOX9_8	1910	4729.21	0.404	0.0001	1447	4444.49	0.3257	0.0001	None significant
SOX9_9	2162	5386.76	0.4015	0.0001	1477	5078.9	0.291	0.0001	None significant
SOX_1	3764	5220.6	0.721	0.0001	2940	4867.92	0.604	0.0001	None significant
SP100_1	1875	1059.7	1.7686	0.0001	1382	969.25	1.4254	0.0001	Both significant
SP1_known3	79198	47512.1	1.6669	0.0001	68027	42959.6	1.5835	0.0001	Both significant
SPDEF_1	19755	9544	2.0698	0.0001	13210	8633.13	1.5301	0.0001	Both significant
SPDEF_2	9033	3935.89	2.2947	0.0001	4360	3562.59	1.2238	0.0001	Both significant
SPDEF_3	8411	5751.27	1.4624	0.0001	9487	5222.33	1.8165	0.0001	Both significant
SPDEF_4	5286	7411.64	0.7132	0.0001	4460	6901.07	0.6463	0.0001	None significant
SPDEF_5	10725	5117.22	2.0957	0.0001	5748	4640.72	1.2385	0.0001	Both significant
SPDEF_6	15786	10308.4	1.5313	0.0001	18967	9293.25	2.0408	0.0001	Both significant
SPDEF_7	6533	7229.88	0.9036	0.015	5608	6711.66	0.8356	0.0001	None significant
SPI1_known1	13321	12831.3	1.0382	0.0653	12391	11762.7	1.0534	0.0164	None significant
SPI1_known2	3533	4198.51	0.8415	0.0001	2602	3878.52	0.671	0.0001	None significant
SPI1_known3	21349	14945.5	1.4284	0.0001	14683	13724.2	1.0699	0.0119	Only upstream significant
SPI1_known4	10335	9637.84	1.0723	0.0254	6870	8925.41	0.7697	0.0001	None significant
SPIB_1	4932	5910.21	0.8345	0.0001	4342	5487.03	0.7914	0.0001	None significant
SPIB_2	12858	11003.2	1.1686	0.0001	8227	10162.7	0.8095	0.0001	Only upstream significant
SPIC_1	10724	10405.9	1.0306	0.2137	8036	9646.56	0.8331	0.0001	None significant
SPIC_2	10997	9865.14	1.1147	0.0014	6962	9154.77	0.7605	0.0001	Only upstream significant
SPZ1_2	10899	10268	1.0614	0.0239	11054	9430.61	1.1721	0.0001	Only downstream significant
SREBP_known1	7787	6442.75	1.2086	0.0001	3953	5945.59	0.6649	0.0001	Only upstream significant
SREBP_known2	10814	10486.9	1.0312	0.1455	11865	9600.04	1.2359	0.0001	Only downstream significant
SREBP_known3	6589	6100.26	1.0801	0.0044	7193	5543.99	1.2974	0.0001	Both significant
SREBP_known4	15988	15537.6	1.029	0.1406	16663	14153	1.1773	0.0001	Only downstream significant
SREBP_known5	5460	2930.93	1.8626	0.0001	1807	2688.8	0.6722	0.0001	Only upstream significant
SREBP_known6	5575	3229.12	1.7263	0.0001	1959	2961.44	0.6616	0.0001	Only upstream significant
SRF_known1	3278	4449.44	0.7368	0.0001	1753	4139.52	0.4236	0.0001	None significant
SRF_known10	2359	2875.27	0.8205	0.006	1404	2654.29	0.5291	0.0001	None significant
SRF_known2	7538	6983.53	1.0794	0.0339	5644	6408.89	0.8807	0.0045	None significant
SRF_known3	5375	6119.47	0.8784	0.006	3779	5657.63	0.668	0.0001	None significant
SRF_known4	12828	11619.6	1.104	0.0119	10253	10660.1	0.9618	0.1621	None significant
SRF_known5	9468	8820.32	1.0734	0.0238	8058	8066.38	0.999	0.4945	None significant
SRF_known6	11064	10125.1	1.0927	0.0119	8938	9310.03	0.96	0.1772	None significant
SRF_known7	2676	2668.56	1.0028	0.4734	1378	2473.93	0.5572	0.0001	None significant
SRF_known8	2427	2553.43	0.9505	0.2324	1065	2357.58	0.452	0.0001	None significant
SRF_known9	1895	1856.45	1.0208	0.3798	897	1727.54	0.5195	0.0001	None significant
SRY_2	2568	3924.91	0.6544	0.0001	2092	3686.02	0.5677	0.0001	None significant
SRY_3	1077	2100.81	0.5129	0.0001	658	1968.38	0.3346	0.0001	None significant
SRY_4	732	1594.06	0.4595	0.0001	438	1498.95	0.2927	0.0001	None significant
SRY_5	1180	3131.36	0.377	0.0001	869	2934.66	0.2964	0.0001	None significant
SRY_6	887	2489.52	0.3566	0.0001	638	2349.53	0.2719	0.0001	None significant
SRY_7	1366	2673.12	0.5112	0.0001	949	2500.76	0.3797	0.0001	None significant
SRY_8	1313	3243.61	0.405	0.0001	861	3032.46	0.2842	0.0001	None significant
STAT_known1	4317	3861.71	1.1179	0.0044	2897	3570.42	0.8114	0.0001	Only upstream significant
STAT_known10	5759	4004.81	1.4379	0.0001	3893	3674.3	1.0595	0.0868	Only upstream significant
STAT_known11	19999	11986.5	1.6684	0.0001	18052	10871.9	1.6604	0.0001	Both significant
STAT_known12	2574	2554.69	1.0076	0.4401	1972	2377.65	0.8295	0.0001	None significant
STAT_known13	3623	5281.6	0.686	0.0001	3670	4903.31	0.7485	0.0001	None significant
STAT_known14	21279	16957.2	1.2548	0.0001	20123	15508.3	1.2975	0.0001	Both significant
STAT_known15	19368	15854.6	1.2216	0.0001	15687	14536.6	1.0791	0.0029	Both significant
STAT_known16	15036	14353.6	1.0475	0.0269	11947	13201	0.905	0.0001	None significant
STAT_known17	17199	14548.2	1.1822	0.0001	11733	13384.5	0.8766	0.0001	Only upstream significant
STAT_known2	30241	15189.4	1.9909	0.0001	21006	13802.9	1.5218	0.0001	Both significant
STAT_known3	20476	11625.2	1.7613	0.0001	13832	10597.6	1.3052	0.0001	Both significant
STAT_known4	8130	7092.98	1.1462	0.0001	5528	6539.61	0.8453	0.0001	Only upstream significant
STAT_known5	5723	5488.14	1.0428	0.2069	3696	5089.76	0.7262	0.0001	None significant
STAT_known6	19100	14184.8	1.3465	0.0001	16514	12992.6	1.271	0.0001	Both significant
STAT_known7	11256	6160.85	1.8269	0.0001	5811	5634.49	1.0313	0.2004	Only upstream significant
STAT_known8	5155	5898.16	0.874	0.0001	3520	5472.28	0.6433	0.0001	None significant
STAT_known9	2067	3034.27	0.6813	0.0001	1409	2837.57	0.4967	0.0001	None significant
TAL1_known1	13072	20416.7	0.6403	0.0001	12431	18833.6	0.6601	0.0001	None significant
TAL1_known2	15871	24383.8	0.6509	0.0001	16179	22390.1	0.7226	0.0001	None significant
TAL1_known3	10741	18165.4	0.5913	0.0001	10372	16772.7	0.6184	0.0001	None significant
TAL1_known4	20258	24794.5	0.817	0.0001	20193	22757.2	0.8873	0.0001	None significant
TAL1_known5	4807	9406.17	0.5111	0.0001	4707	8693.6	0.5415	0.0001	None significant
TATA_known1	2252	3044.4	0.7398	0.0001	1403	2848.79	0.4927	0.0001	None significant
TATA_known2	3884	3094.26	1.2551	0.0001	1481	2866.48	0.5168	0.0001	Only upstream significant
TATA_known3	434	985.365	0.441	0.0001	207	926.23	0.2243	0.0001	None significant
TATA_known5	3929	3118.84	1.2597	0.0001	1496	2871.64	0.5211	0.0001	Only upstream significant
TATA_known6	1112	2408.37	0.4619	0.0001	599	2269.25	0.2643	0.0001	None significant
TBR1_1	3361	4695.29	0.7159	0.0001	3080	4362.2	0.7061	0.0001	None significant
TBR1_2	4001	5507.28	0.7265	0.0001	3411	5100.86	0.6688	0.0001	None significant
TBX15_2	6176	7277.97	0.8486	0.0001	6182	6682.3	0.9251	0.018	None significant
TBX19_1	3260	4163.72	0.783	0.0001	2682	3849.84	0.6967	0.0001	None significant
TBX1_1	9247	12474.8	0.7413	0.0001	8549	11516.1	0.7424	0.0001	None significant
TBX1_3	3228	4235.65	0.7622	0.0001	3061	3904.75	0.784	0.0001	None significant
TBX1_4	8396	10496.9	0.7999	0.0001	8133	9674.48	0.8407	0.0001	None significant
TBX20_1	11491	11503.9	0.9989	0.5155	11031	10538.3	1.0468	0.1326	None significant
TBX20_2	5307	6386.73	0.831	0.0001	4916	5879	0.8362	0.003	None significant
TBX20_3	7373	8693.16	0.8482	0.0001	7128	8045.57	0.886	0.0015	None significant
TBX20_4	4465	5931.45	0.7528	0.0001	4257	5497.96	0.7743	0.0001	None significant
TBX20_5	8760	11063.6	0.7918	0.0001	8986	10182.1	0.8825	0.0001	None significant
TBX21_1	5388	4911.25	1.0971	0.0508	3692	4548.19	0.8118	0.0001	None significant
TBX21_2	3740	4892.63	0.7645	0.0001	3419	4514.01	0.7575	0.0001	None significant
TBX21_3	8968	8449.09	1.0614	0.0884	8363	7754.23	1.0785	0.0464	None significant
TBX21_4	4291	6061.31	0.708	0.0001	3715	5609.46	0.6623	0.0001	None significant
TBX21_5	3790	5390.03	0.7032	0.0001	3777	4989.37	0.7571	0.0001	None significant
TBX21_6	6271	8947.95	0.7009	0.0001	5625	8259.21	0.6811	0.0001	None significant
TBX2_1	11922	9575.02	1.2451	0.0001	9895	8805.73	1.1237	0.0059	Only upstream significant
TBX2_2	4424	5996.78	0.7378	0.0001	4124	5541.51	0.7442	0.0001	None significant
TBX4_1	4569	5210.74	0.8769	0.0001	4156	4781.04	0.8693	0.0001	None significant
TBX4_2	9603	8266.29	1.1617	0.0001	6881	7594.95	0.906	0.021	Only upstream significant
TBX5_1	7427	9704.24	0.7654	0.0001	8444	8902.76	0.9485	0.0706	None significant
TBX5_2	7634	8838.16	0.8638	0.0001	8606	8092.67	1.0634	0.0344	None significant
TBX5_3	6332	8890.66	0.7122	0.0001	7119	8179.06	0.8704	0.0001	None significant
TBX5_4	5870	7185.9	0.8169	0.0001	5891	6626.37	0.889	0.0015	None significant
TBX5_5	6829	6853.65	0.9964	0.4878	5146	6334.99	0.8123	0.0001	None significant
TCF12_known1	23628	24710.3	0.9562	0.006	24366	22590.2	1.0786	0.0001	Only downstream significant
TCF21_1	6569	10123.1	0.6489	0.0001	5982	9359.87	0.6392	0.0001	None significant
TCF3_1	64421	57660.1	1.1173	0.0001	66878	52564.1	1.2723	0.0001	Both significant
TCF3_2	21010	27802.5	0.7557	0.0001	22401	25434.3	0.8807	0.0001	None significant
TCF3_3	21395	28117.2	0.7609	0.0001	23158	25710.1	0.9007	0.0001	None significant
TCF3_4	43105	44429.9	0.9702	0.0463	43904	40614.3	1.081	0.0001	Only downstream significant
TCF3_5	13240	17035.6	0.7772	0.0001	14275	15634.9	0.913	0.0001	None significant
TCF3_6	34205	37800.9	0.9049	0.0001	35496	34509.1	1.0286	0.0856	None significant
TCF3_7	18409	23848.6	0.7719	0.0001	19950	21858.1	0.9127	0.0001	None significant
TCF4_1	19828	24779	0.8002	0.0001	22328	22721.5	0.9827	0.207	None significant
TCF4_2	19706	21527.1	0.9154	0.0001	20811	19672.6	1.0579	0.0044	Only downstream significant
TCF7L1_1	3636	6524.53	0.5573	0.0001	3215	6094.86	0.5276	0.0001	None significant
TCF7L1_2	4599	6585.69	0.6984	0.0001	3793	6117.58	0.6201	0.0001	None significant
TCF7L2_known1	2375	3596.87	0.6604	0.0001	2100	3331.7	0.6304	0.0001	None significant
TCF7L2_known3	3083	5042.56	0.6115	0.0001	3076	4693.45	0.6555	0.0001	None significant
TCF7L2_known4	3993	5472.04	0.7298	0.0001	3590	5067.77	0.7085	0.0001	None significant
TCF7L2_known5	4771	7331.23	0.6508	0.0001	4103	6819.85	0.6017	0.0001	None significant
TCF7L2_known6	4612	7384.7	0.6246	0.0001	4115	6873.69	0.5987	0.0001	None significant
TCF7L2_known7	4434	7264.25	0.6104	0.0001	3668	6748.31	0.5436	0.0001	None significant
TCF7_1	4240	7133.19	0.5945	0.0001	3455	6692.33	0.5163	0.0001	None significant
TCF7_2	3857	6027.71	0.6399	0.0001	3105	5628.38	0.5517	0.0001	None significant
TEAD1_2	7089	8477.01	0.8363	0.0001	6811	7856.49	0.8669	0.0001	None significant
TEAD1_3	3189	4609.78	0.6919	0.0001	2843	4278.39	0.6646	0.0001	None significant
TEAD1_4	3962	6096.34	0.65	0.0001	2779	5689.63	0.4885	0.0001	None significant
TEAD3_1	3885	5885.84	0.6601	0.0001	3026	5458.99	0.5544	0.0001	None significant
TEAD3_2	2336	3115.82	0.7498	0.0001	1778	2887.41	0.6159	0.0001	None significant
TEAD4_1	3364	4689.74	0.7174	0.0001	2746	4336.33	0.6333	0.0001	None significant
TEF_1	1032	2540.92	0.4064	0.0001	744	2390.44	0.3115	0.0001	None significant
TEF_2	1008	1195.48	0.8433	0.045	487	1122.49	0.4344	0.0001	None significant
TEF_3	810	1649.51	0.4914	0.0001	607	1544.63	0.3934	0.0001	None significant
TFAP2B_1	63575	41677	1.5254	0.0001	67172	37703.8	1.7815	0.0001	Both significant
TFAP2B_2	68624	43225.6	1.5876	0.0001	71692	39063.5	1.8352	0.0001	Both significant
TFAP2B_3	55191	33659.9	1.6396	0.0001	55807	30472.3	1.8314	0.0001	Both significant
TFAP2B_4	68371	42905.6	1.5935	0.0001	67069	38807.9	1.7282	0.0001	Both significant
TFAP2E_1	82343	49396.9	1.667	0.0001	86557	44638.8	1.939	0.0001	Both significant
TFAP2_known10	64302	40857.2	1.5738	0.0001	68256	37037.7	1.8429	0.0001	Both significant
TFAP2_known12	73637	43125.6	1.7075	0.0001	73128	38963.9	1.8768	0.0001	Both significant
TFAP2_known13	81807	49275.5	1.6602	0.0001	80057	44493.7	1.7993	0.0001	Both significant
TFAP2_known14	64968	41065	1.5821	0.0001	67377	37132.3	1.8145	0.0001	Both significant
TFAP2_known15	46420	28865	1.6082	0.0001	46035	26150.3	1.7604	0.0001	Both significant
TFAP2_known16	71890	43767.7	1.6425	0.0001	70752	39569.3	1.788	0.0001	Both significant
TFAP2_known18	70296	42402.1	1.6578	0.0001	69997	38337.4	1.8258	0.0001	Both significant
TFAP2_known19	68374	42548.6	1.6069	0.0001	67570	38460.8	1.7568	0.0001	Both significant
TFAP2_known21	88902	49982.9	1.7786	0.0001	84768	45238.5	1.8738	0.0001	Both significant
TFAP2_known22	73465	45930.2	1.5995	0.0001	72708	41454.6	1.7539	0.0001	Both significant
TFAP2_known6	104169	63058.9	1.6519	0.0001	106855	57080.5	1.872	0.0001	Both significant
TFAP2_known7	50150	29121.1	1.7221	0.0001	46994	26362	1.7826	0.0001	Both significant
TFAP2_known9	73634	44874.6	1.6409	0.0001	75941	40685.3	1.8665	0.0001	Both significant
TFAP4_1	56907	51060.1	1.1145	0.0001	58794	46682.5	1.2594	0.0001	Both significant
TFAP4_2	20666	21970.9	0.9406	0.003	21472	20114.1	1.0675	0.0001	Only downstream significant
TFAP4_3	25495	23307.2	1.0939	0.0001	25734	21277.3	1.2094	0.0001	Both significant
TFAP4_4	22993	25194.5	0.9126	0.0001	24694	23093.9	1.0693	0.0001	Only downstream significant
TFAP4_5	5166	9083.14	0.5688	0.0001	4833	8384.57	0.5765	0.0001	None significant
TFAP4_6	5890	9733.51	0.6052	0.0001	5454	8987.1	0.6069	0.0001	None significant
TFCP2L1_1	50344	40740.7	1.2357	0.0001	52410	37069.6	1.4138	0.0001	Both significant
TFCP2_1	23629	20320.1	1.1628	0.0001	24581	18494.7	1.3291	0.0001	Both significant
TFCP2_2	8975	11943.7	0.7515	0.0001	9227	10972.6	0.8409	0.0001	None significant
TFCP2_3	66054	52816.1	1.2506	0.0001	66532	47993.7	1.3863	0.0001	Both significant
TFCP2_4	2031	1654.01	1.2278	0.0029	1606	1518.77	1.0574	0.2363	Only upstream significant
TFCP2_5	8387	5993.01	1.3994	0.0001	7284	5477.76	1.3297	0.0001	Both significant
TFE3_1	9344	5547.36	1.6843	0.0001	4594	5041.11	0.9113	0.012	Only upstream significant
TFEB_1	7589	5833.31	1.3009	0.0001	3346	5344.95	0.6261	0.0001	Only upstream significant
TFEC_1	6824	5421.83	1.2586	0.0001	2787	4975.02	0.5603	0.0001	Only upstream significant
TFE_1	4129	4093.83	1.0086	0.4242	1598	3798.23	0.4209	0.0001	None significant
TGIF1_1	4079	7573.92	0.5386	0.0001	3853	7058.4	0.5459	0.0001	None significant
TGIF1_2	10901	14571	0.7481	0.0001	9919	13482.8	0.7357	0.0001	None significant
TGIF1_3	2960	6341.74	0.4668	0.0001	3085	5876.78	0.525	0.0001	None significant
TGIF2LX_1	3384	6660.63	0.5081	0.0001	3524	6177.02	0.5706	0.0001	None significant
TGIF2_1	6273	9904.79	0.6334	0.0001	5739	9190.26	0.6245	0.0001	None significant
TGIF2_2	3794	6778.75	0.5598	0.0001	3987	6285.27	0.6344	0.0001	None significant
THRA_1	8657	9619.71	0.8999	0.0105	8499	8823.88	0.9632	0.1978	None significant
THRB_1	10013	10988.8	0.9112	0.0075	10411	10020.5	1.039	0.1761	None significant
THRB_2	9305	11301.9	0.8233	0.0001	11632	10337.2	1.1252	0.0029	Only downstream significant
THRB_3	10690	11951.3	0.8945	0.0015	12114	10918.5	1.1095	0.0029	Only downstream significant
TLX2_1	5316	3999.85	1.329	0.0001	5463	3661.11	1.492	0.0001	Both significant
TLX2_2	1428	3533.14	0.4043	0.0001	600	3321.61	0.1809	0.0001	None significant
TP53_2	6774	7694.34	0.8804	0.0015	6230	7068.28	0.8814	0.0001	None significant
TP53_3	9181	9452.44	0.9713	0.1635	8523	8671.53	0.9829	0.3069	None significant
TP53_4	19430	18945.9	1.0255	0.2382	18581	17376.3	1.0693	0.0254	None significant
TP53_5	6790	11431.8	0.594	0.0001	6956	10563.7	0.6585	0.0001	None significant
TP53_6	4101	7652.81	0.5359	0.0001	4090	7134.66	0.5733	0.0001	None significant
TP53_7	6518	7692.7	0.8473	0.0001	5751	7051.57	0.8156	0.0001	None significant
TP63_1	4157	4182.38	0.9939	0.4747	2928	3879.76	0.7547	0.0001	None significant
TP73_1	8009	7392.69	1.0834	0.048	6107	6800.76	0.898	0.0195	None significant
T_1	6486	8707.89	0.7449	0.0001	6216	8045.23	0.7727	0.0001	None significant
T_2	3011	4580.51	0.6574	0.0001	2576	4243.52	0.6071	0.0001	None significant
T_3	2932	3837.78	0.764	0.0001	2674	3557.09	0.7518	0.0001	None significant
UNCX_1	1267	2132.5	0.5943	0.0001	731	2007.09	0.3645	0.0001	None significant
UNCX_2	943	2022.71	0.4665	0.0001	532	1893.65	0.2813	0.0001	None significant
UNCX_3	895	1043.61	0.8577	0.0495	375	973.522	0.3858	0.0001	None significant
UNCX_4	848	1900.87	0.4464	0.0001	454	1775.38	0.2561	0.0001	None significant
UNCX_5	456	1105.83	0.4129	0.0001	368	1034.32	0.3564	0.0001	None significant
VAX1_1	1877	3138.68	0.5982	0.0001	1226	2944.52	0.4166	0.0001	None significant
VAX1_2	639	1403.88	0.4556	0.0001	468	1325.45	0.3536	0.0001	None significant
VAX2_1	1683	2545.42	0.6613	0.0001	1072	2367.14	0.4531	0.0001	None significant
VAX2_2	639	1407.86	0.4543	0.0001	468	1317.92	0.3556	0.0001	None significant
VDR_2	17728	14521.3	1.2208	0.0001	19789	13220.7	1.4968	0.0001	Both significant
VDR_3	53488	42823.6	1.249	0.0001	58695	39001.7	1.5049	0.0001	Both significant
VDR_4	7941	7129.85	1.1138	0.0059	8415	6555.35	1.2836	0.0001	Only downstream significant
VDR_5	10109	9779.85	1.0337	0.1974	10656	8988.41	1.1855	0.0001	Only downstream significant
VDR_6	12251	10868.1	1.1272	0.0001	13180	10005.8	1.3172	0.0001	Both significant
VENTX_1	779	1224.98	0.6362	0.0001	543	1144.89	0.4747	0.0001	None significant
VENTX_2	1738	2603.44	0.6677	0.0001	1003	2441.26	0.4111	0.0001	None significant
VSX1_1	1449	2448.74	0.5919	0.0001	720	2297.38	0.3137	0.0001	None significant
VSX1_2	298	1056.23	0.2828	0.0001	285	989.487	0.2887	0.0001	None significant
VSX1_3	5696	3196.66	1.7816	0.0001	1277	2937.89	0.4349	0.0001	Only upstream significant
VSX1_4	1187	1342.58	0.8842	0.0522	447	1250.18	0.3581	0.0001	None significant
VSX2_1	1308	2176.37	0.6012	0.0001	802	2039.58	0.3935	0.0001	None significant
VSX2_2	298	1055.96	0.2829	0.0001	285	983.997	0.2904	0.0001	None significant
XBP1_1	6675	4423.13	1.509	0.0001	4325	4030.9	1.0729	0.129	Only upstream significant
XBP1_2	6156	4492.24	1.3703	0.0001	4906	4143.07	1.1841	0.0044	Both significant
XBP1_3	8073	3628.53	2.2245	0.0001	2717	3314.71	0.8197	0.0001	Only upstream significant
XBP1_4	8821	5540.68	1.5919	0.0001	5523	5069.73	1.0894	0.0389	Only upstream significant
YY1_known1	9765	9384.8	1.0405	0.156	9436	8628.91	1.0935	0.0089	None significant
YY1_known2	30890	29253.6	1.0559	0.0149	34088	26729.3	1.2753	0.0001	Only downstream significant
YY1_known3	13402	8240.62	1.6263	0.0001	13013	7493.79	1.7364	0.0001	Both significant
YY1_known4	6819	7888.56	0.8644	0.0001	7494	7265.01	1.0315	0.1574	None significant
YY1_known5	9979	8199.86	1.2169	0.0001	10408	7489.54	1.3896	0.0001	Both significant
YY1_known7	9513	5848.03	1.6266	0.0001	11262	5295.36	2.1266	0.0001	Both significant
YY2_1	8241	4505.72	1.8288	0.0001	9656	4082.06	2.3651	0.0001	Both significant
YY2_2	12838	9270.52	1.3848	0.0001	15686	8446.84	1.8569	0.0001	Both significant
ZBED1_1	1750	857.034	2.0407	0.0001	1434	788.218	1.8183	0.0001	Both significant
ZBTB12_1	6580	6412.64	1.0261	0.2869	6471	5900.31	1.0967	0.0359	None significant
ZBTB14_1	66616	28883.1	2.3064	0.0001	49607	26028.8	1.9058	0.0001	Both significant
ZBTB14_2	91664	38835.8	2.3603	0.0001	68993	34943.3	1.9744	0.0001	Both significant
ZBTB14_3	83058	33337.3	2.4914	0.0001	57189	30122.3	1.8985	0.0001	Both significant
ZBTB16_1	5036	7648.82	0.6584	0.0001	3210	7182.22	0.447	0.0001	None significant
ZBTB18_1	6816	10819.7	0.63	0.0001	6434	10010.7	0.6427	0.0001	None significant
ZBTB18_2	6867	12191.2	0.5633	0.0001	6624	11286.1	0.587	0.0001	None significant
ZBTB18_3	7906	14020.5	0.5639	0.0001	7788	12955.1	0.6012	0.0001	None significant
ZBTB33_known1	11490	13312.6	0.8631	0.0001	10688	12247.9	0.8727	0.0001	None significant
ZBTB3_1	40672	36511	1.114	0.0001	37334	33539.4	1.1131	0.0001	Both significant
ZBTB49_1	24437	16180.7	1.5102	0.0001	21643	14806.4	1.4617	0.0001	Both significant
ZBTB6_1	25182	19657.2	1.281	0.0001	26100	17900.2	1.4581	0.0001	Both significant
ZBTB7A_known1	41029	28211.4	1.4543	0.0001	52312	25365.2	2.0623	0.0001	Both significant
ZBTB7A_known2	25403	18199	1.3958	0.0001	30159	16451.5	1.8332	0.0001	Both significant
ZBTB7A_known3	41608	22923.3	1.8151	0.0001	43911	20659.9	2.1254	0.0001	Both significant
ZBTB7A_known4	28724	18024.1	1.5936	0.0001	33647	16291.9	2.0652	0.0001	Both significant
ZBTB7C_1	38864	24457.6	1.589	0.0001	44442	22111.3	2.0099	0.0001	Both significant
ZEB1_known1	10471	13349.5	0.7844	0.0001	14669	12250.2	1.1974	0.0001	Only downstream significant
ZEB1_known2	9408	13185.5	0.7135	0.0001	12022	12132.6	0.9909	0.3882	None significant
ZEB1_known3	19029	20502.4	0.9281	0.0001	19644	18737.3	1.0484	0.0285	None significant
ZEB1_known4	4559	4580.13	0.9954	0.4599	4040	4237.76	0.9533	0.1497	None significant
ZIC1_1	22728	14637.8	1.5527	0.0001	22937	13247.2	1.7314	0.0001	Both significant
ZIC1_3	87309	56511.7	1.545	0.0001	85121	51225	1.6617	0.0001	Both significant
ZIC2_1	30311	19969.1	1.5179	0.0001	27188	18035	1.5075	0.0001	Both significant
ZIC3_1	24158	18255.7	1.3233	0.0001	27803	16515.1	1.6834	0.0001	Both significant
ZIC3_3	113804	67266.9	1.6918	0.0001	103941	60838.1	1.7085	0.0001	Both significant
ZIC3_4	105728	66785.3	1.5831	0.0001	100654	60477.6	1.6643	0.0001	Both significant
ZIC4_1	112633	69845.1	1.6126	0.0001	110227	63148.3	1.7455	0.0001	Both significant
ZKSCAN3_1	12487	10538	1.1849	0.0001	12942	9618.71	1.3455	0.0001	Both significant
ZNF143_known1	83117	59124	1.4058	0.0001	72430	53774.4	1.3469	0.0001	Both significant
ZNF143_known2	15256	12229.9	1.2474	0.0001	8948	11165.5	0.8014	0.0001	Only upstream significant
ZNF232_1	2414	4137.22	0.5836	0.0001	1645	3890.63	0.423	0.0001	None significant
ZNF282_1	16903	15337.2	1.1021	0.0001	19576	14060.1	1.3923	0.0001	Both significant
ZNF350_1	31682	25711.4	1.2322	0.0001	29855	23548	1.2678	0.0001	Both significant
ZNF35_1	6788	8672.95	0.7827	0.0001	4145	8088.53	0.5125	0.0001	None significant
ZNF384_1	3389	3663.37	0.9251	0.0543	3017	3409.7	0.8849	0.0105	None significant
ZNF410_1	12613	14421.1	0.8746	0.0001	13124	13212.1	0.9933	0.4084	None significant
ZNF410_2	2883	4110.91	0.7014	0.0001	2253	3832.72	0.5879	0.0001	None significant
ZNF423_1	13861	13231.7	1.0476	0.0621	14225	12096.3	1.176	0.0001	Only downstream significant
ZNF423_2	30906	26460.9	1.168	0.0001	35220	24038.3	1.4651	0.0001	Both significant
ZNF524_1	24737	17258.8	1.4333	0.0001	29134	15631.9	1.8637	0.0001	Both significant
ZNF524_2	27453	16188.4	1.6958	0.0001	31917	14651	2.1784	0.0001	Both significant
ZNF589_1	40578	30351.1	1.3369	0.0001	42014	27616.9	1.5213	0.0001	Both significant
ZNF628_1	5784	6594.21	0.8772	0.0015	4733	6078.53	0.7787	0.0001	None significant
ZNF652_1	3522	3729.77	0.9443	0.1668	2606	3472.87	0.7505	0.0001	None significant
ZNF691_1	18367	21297.4	0.8624	0.0001	17712	19608.4	0.9033	0.0001	None significant
ZNF713_1	5866	7619.34	0.7699	0.0001	5448	7086.33	0.7688	0.0001	None significant
ZNF75A_1	14480	13766.7	1.0518	0.0344	13057	12688.8	1.029	0.1478	None significant
ZNF784_1	5138	5330.76	0.9638	0.1919	7143	4877.66	1.4643	0.0001	Only downstream significant
ZNF8_1	6466	3361.09	1.9235	0.0001	5036	3067.5	1.6415	0.0001	Both significant
ZSCAN16_1	5333	8863.88	0.6017	0.0001	4165	8225.53	0.5064	0.0001	None significant
ZSCAN26_1	972	2340.16	0.4156	0.0001	484	2184.38	0.2219	0.0001	None significant
ZSCAN4_1	6849	9802.03	0.6988	0.0001	5315	9081.09	0.5853	0.0001	None significant
ZSCAN4_2	6237	9690.07	0.6437	0.0001	5247	9017.88	0.5819	0.0001	None significant
ZSCAN4_3	12040	15724.1	0.7657	0.0001	10705	14490	0.7388	0.0001	None significant

## Sheet: Info
Column	Name of the TF footprint motif
observed_tc_flanking_upstream_500	Observed footprint motif occurrences in regions 500bp upstream of TC
expected_tc_flanking_upstream_500	Expected footprint motif occurrences in regions 500bp upstream of TC
fold_tc_flanking_upstream_500	Fold enrichment (Observed/Expected) footprint motif occurrences in regions 500bp upstream of TC
pvalue_tc_flanking_upstream_500	P value
observed_tc_flanking_downstream_500	Observed footprint motif occurrences in regions 500bp downstream of TC
expected_tc_flanking_downstream_500	Expected footprint motif occurrences in regions 500bp downstream of TC
fold_tc_flanking_downstream_500	Fold enrichment (Observed/Expected) footprint motif occurrences in regions 500bp downstream of TC
pvalue_tc_flanking_downstream_500	P value
significance	Significance after Benjamini-Yekutieli FDR correction
